# Supplementary material for: Targeted and Untargeted Metabolomic Analyses Reveal Organ Specificity of Specialized Metabolites in the Model Grass Brachypodium distachyon
Source: MDPI journal article supplement (doi:10.3390/molecules27185956), 2022-09-13
Supplement: s1 [file s1]

**A**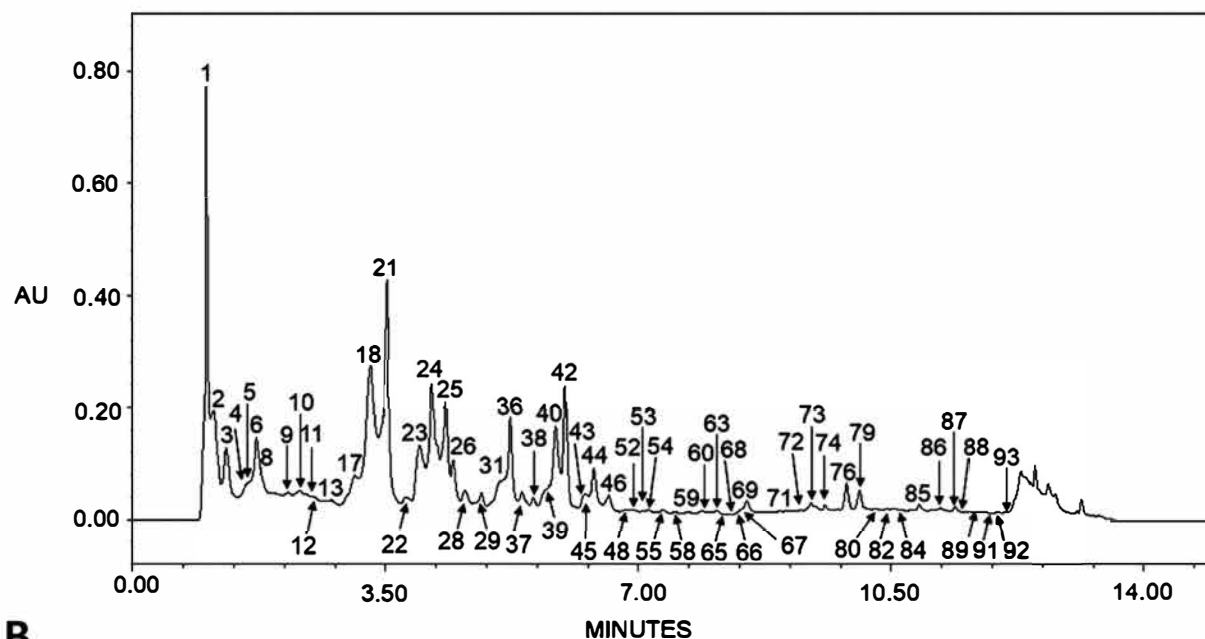**B**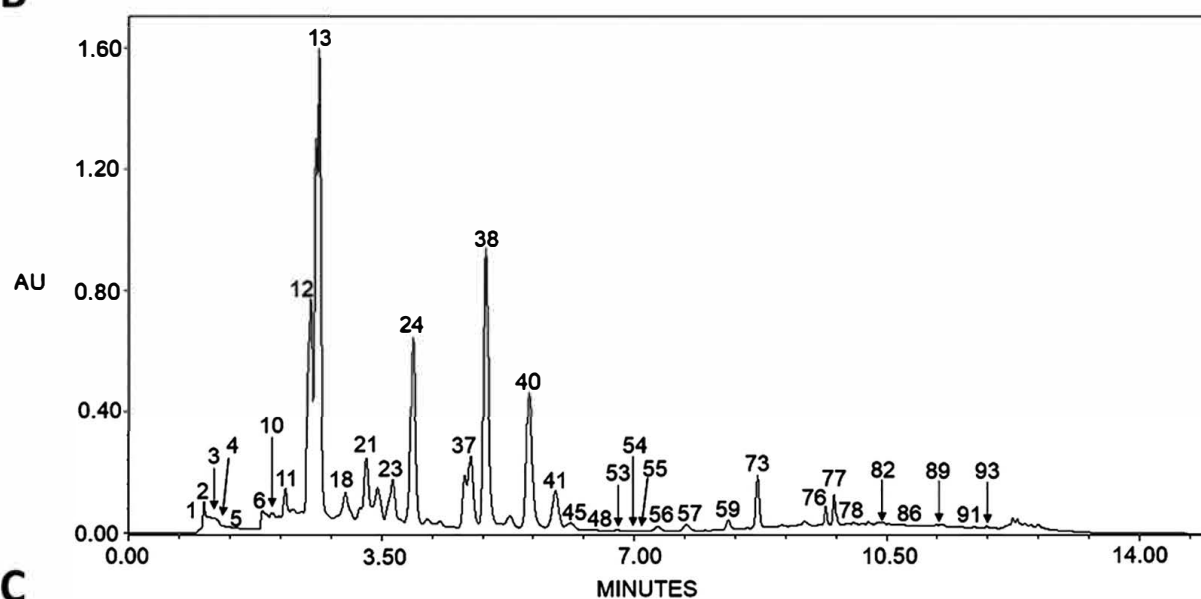**C**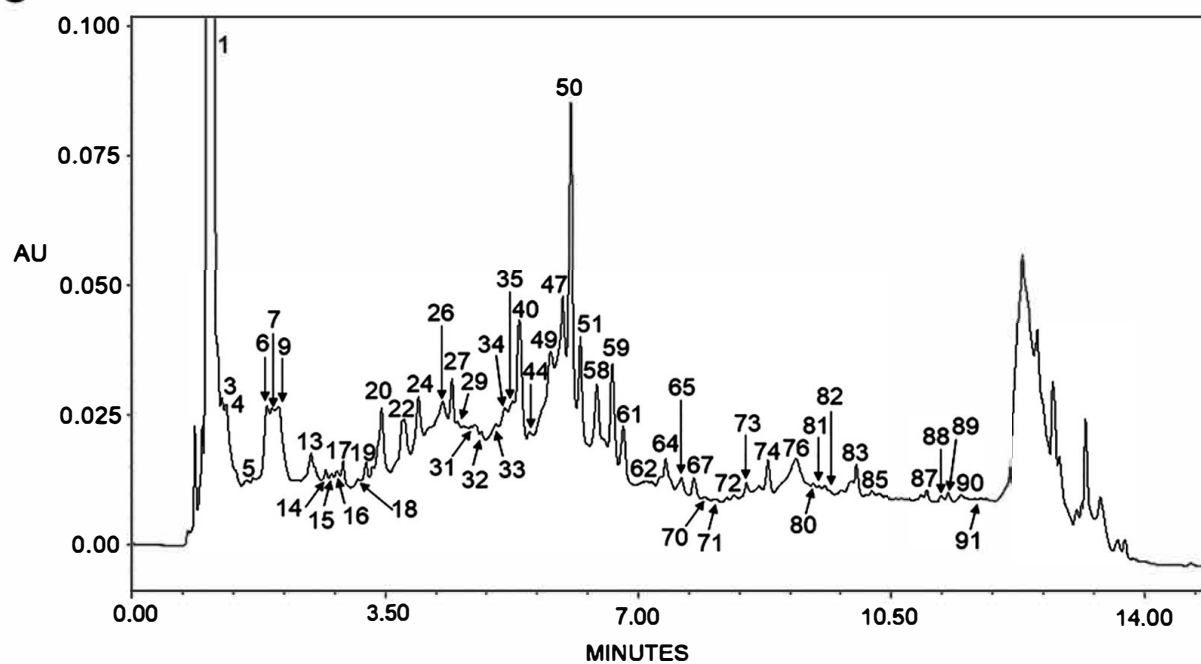

**Supplementary Figure S2.** Representative UV chromatograms recorded at 270 nm during analysis of samples prepared from (A) leaves, (B) roots, (C) spikes. Numbers indicate peaks of identified metabolites accordingly with Table 3.
