# Supplementary material for: Targeted and Untargeted Metabolomic Analyses Reveal Organ Specificity of Specialized Metabolites in the Model Grass Brachypodium distachyon
Source: Molecules. 2022 Sep 13;27(18):5956. doi: 10.3390/molecules27185956 (PMC9506550; doi:10.3390/molecules27185956)
Supplement: Supplementary file 1 [file molecules-27-05956-s001.zip]

Archive with 7 entries (7 files):
- Supplementary Figure S1.pdf
- Supplementary Figure S2.pdf
- Supplementary File S1.txt
- Supplementary Table S1.xlsx
- Supplementary Table S2.xlsx
- Supplementary Table S3.xlsx
- Supplementary Table S4.xlsx
