# Supplementary material for: Targeted and Untargeted Metabolomic Analyses Reveal Organ Specificity of Specialized Metabolites in the Model Grass Brachypodium distachyon
Source: Molecules. 2022 Sep 13;27(18):5956. doi: 10.3390/molecules27185956 (PMC9506550; doi:10.3390/molecules27185956)
Supplement: Supplementary file 1 [file molecules-27-05956-s001.zip › Supplementary File S1.txt]

Supplementary File 1. Parameters of raw MS/MS data processing by MZmine software including peak detection, peak deconvolution, alignment and gap filling parameters.


<?xml version="1.0" encoding="UTF-8"?><configuration>
    <preferences>
        <parameter name="Color palettes (color blindness mode)">DEUTERANOPIA</parameter>
        <parameter name="m/z value format">#0.0000</parameter>
        <parameter name="Retention time value format">#0.00</parameter>
        <parameter name="Intensity format">0.0E0</parameter>
        <parameter isautomatic="true" name="Number of concurrently running tasks">16</parameter>
        <parameter name="Use proxy">
            <parameter name="Proxy adress"/>
            <parameter name="Proxy port"/>
        </parameter>
        <parameter name="R executable path"/>
        <parameter name="Send anonymous statistics">true</parameter>
        <parameter name="Window state">
            <position>460:170</position>
            <size>1000:700</size>
            <maximized>false</maximized>
        </parameter>
        <parameter name="Send error e-Mail notifications"/>
    </preferences>
    <lastprojects/>
    <modules>
        <module class="io.github.mzmine.modules.dataprocessing.align_hierarchical.HierarAlignerGcModule">
            <parameters>
                <parameter name="Feature lists"/>
                <parameter name="Clustering strategy">Average</parameter>
                <parameter name="Feature list name">Aligned feature list</parameter>
                <parameter name="m/z tolerance"/>
                <parameter name="Weight for m/z"/>
                <parameter name="Retention time tolerance"/>
                <parameter name="Weight for RT"/>
                <parameter name="Minimum score">0.0</parameter>
                <parameter name="Export dendrogram as TXT/CDT">false</parameter>
                <parameter name="Dendrogram output text filename"/>
            </parameters>
        </module>
        <module class="io.github.mzmine.modules.dataprocessing.featdet_adap3decompositionV2.ADAP3DecompositionV2Module">
            <parameters>
                <parameter name="Chromatograms"/>
                <parameter name="Peaks"/>
                <parameter name="Deconvolution window width (min)">0.2</parameter>
                <parameter name="Retention time tolerance (min)">0.05</parameter>
                <parameter name="Minimum Number of Peaks">1</parameter>
                <parameter name="Adjust Apex Ret Times">false</parameter>
                <parameter name="Suffix">Spectral Deconvolution</parameter>
                <parameter name="Remove original feature lists"/>
            </parameters>
        </module>
        <module class="io.github.mzmine.modules.dataprocessing.align_join.JoinAlignerModule">
            <parameters>
                <parameter name="Feature lists" type="GUI_SELECTED_PEAKLISTS"/>
                <parameter name="Feature list name">Aligned feature list</parameter>
                <parameter name="m/z tolerance">
                    <absolutetolerance>0.01</absolutetolerance>
                    <ppmtolerance>5.0</ppmtolerance>
                </parameter>
                <parameter name="Weight for m/z">1.0</parameter>
                <parameter name="Retention time tolerance" type="absolute">0.1</parameter>
                <parameter name="Weight for RT">1.0</parameter>
                <parameter name="Require same charge state">false</parameter>
                <parameter name="Require same ID">false</parameter>
                <parameter name="Compare isotope pattern" selected="false">
                    <parameter name="Isotope m/z tolerance"/>
                    <parameter name="Minimum absolute intensity"/>
                    <parameter name="Minimum score"/>
                </parameter>
                <parameter name="Compare spectra similarity" selected="false">
                    <parameter name="Mass list"/>
                    <parameter name="Spectral m/z tolerance">
                        <absolutetolerance>0.001</absolutetolerance>
                        <ppmtolerance>10.0</ppmtolerance>
                    </parameter>
                    <parameter name="MS level">2</parameter>
                    <parameter name="Compare spectra similarity">
                        <module name="Weighted dot-product cosine">
                            <parameter name="Weights">MassBank (mz^2 * I^0.5)</parameter>
                            <parameter name="Minimum  cos similarity">0.7</parameter>
                            <parameter name="Remove unmatched signals">false</parameter>
                        </module>
                        <module name="Composite dot -product identity (similar to NIST search)">
                            <parameter name="Weights">MassBank (mz^2 * I^0.5)</parameter>
                            <parameter name="Minimum  cos similarity">0.7</parameter>
                            <parameter name="Remove unmatched signals">false</parameter>
                        </module>
                    </parameter>
                </parameter>
            </parameters>
        </module>
        <module class="io.github.mzmine.modules.dataprocessing.norm_linear.LinearNormalizerModule">
            <parameters>
                <parameter name="Feature lists"/>
                <parameter name="Name suffix">normalized</parameter>
                <parameter name="Normalization type"/>
                <parameter name="Peak measurement type"/>
                <parameter name="Remove original feature list"/>
            </parameters>
        </module>
        <module class="io.github.mzmine.modules.io.rawdataimport.RawDataImportModule">
            <parameters>
                <parameter name="Raw data file names">
                    <file>D:\brach tkanki orbitrap\negative\KA4_20200820201441.raw</file>
                    <file>D:\brach tkanki orbitrap\negative\KA5_20200821004853.raw</file>
                    <file>D:\brach tkanki orbitrap\negative\KA7_20200821113417.raw</file>
                    <file>D:\brach tkanki orbitrap\negative\KA8_20200821154732.raw</file>
                    <file>D:\brach tkanki orbitrap\negative\KB4_20200820203549.raw</file>
                    <file>D:\brach tkanki orbitrap\negative\KB5_20200821010957.raw</file>
                    <file>D:\brach tkanki orbitrap\negative\KB7_20200821115528.raw</file>
                    <file>D:\brach tkanki orbitrap\negative\KB8_20200821160839.raw</file>
                </parameter>
            </parameters>
        </module>
        <module class="io.github.mzmine.modules.io.projectload.ProjectLoadModule">
            <parameters>
                <parameter name="Project file"/>
            </parameters>
        </module>
        <module class="io.github.mzmine.modules.visualization.productionfilter.ProductIonFilterVisualizerModule">
            <parameters>
                <parameter name="Raw data files"/>
                <parameter name="X axis"/>
                <parameter name="Retention time"/>
                <parameter name="Precursor m/z"/>
                <parameter name="Window state">
                    <maximized>false</maximized>
                </parameter>
                <parameter name="m/z tolerance"/>
                <parameter name="Diagnostic product ions (m/z)"/>
                <parameter name="Diagnostic neutral loss values (Da)"/>
                <parameter name="Minimum diagnostic ion intensity (% base peak)">5.0</parameter>
                <parameter name="Peaklist output file"/>
            </parameters>
        </module>
        <module class="io.github.mzmine.modules.io.sqlexport.SQLExportModule">
            <parameters>
                <parameter name="Feature lists"/>
                <parameter name="JDBC connection string"/>
                <parameter name="Database table"/>
                <parameter name="Export columns"/>
                <parameter name="Export empty feature list"/>
            </parameters>
        </module>
        <module class="io.github.mzmine.modules.io.rawdataexport.RawDataExportModule">
            <parameters>
                <parameter name="Raw data files"/>
                <parameter name="Folder"/>
                <parameter name="File type">MZML</parameter>
            </parameters>
        </module>
        <module class="io.github.mzmine.modules.dataprocessing.filter_duplicatefilter.DuplicateFilterModule">
            <parameters>
                <parameter name="Feature lists"/>
                <parameter name="Name suffix">filtered</parameter>
                <parameter name="Filter mode">NEW AVERAGE</parameter>
                <parameter name="m/z tolerance"/>
                <parameter name="RT tolerance"/>
                <parameter name="Require same identification"/>
                <parameter name="Remove original peaklist"/>
            </parameters>
        </module>
        <module class="io.github.mzmine.modules.visualization.kendrickmassplot.KendrickMassPlotModule">
            <parameters>
                <parameter name="Feature lists"/>
                <parameter name="Peaks"/>
                <parameter name="Kendrick mass base for y-Axis"/>
                <parameter name="X-Axis"/>
                <parameter name="Kendrick mass base for x-Axis" selected="false"/>
                <parameter name="Z-Axis"/>
                <parameter name="Kendrick mass base for z-Axis" selected="false"/>
                <parameter name="Z-Axis scale"/>
                <parameter name="Range for z-Axis scale"/>
                <parameter name="Heatmap style"/>
                <parameter name="Window state">
                    <maximized>false</maximized>
                </parameter>
            </parameters>
        </module>
        <module class="io.github.mzmine.modules.io.siriusexport.SiriusExportModule">
            <parameters>
                <parameter name="Feature lists"/>
                <parameter name="Mass list"/>
                <parameter name="Filename"/>
                <parameter name="Merge MS/MS" selected="true">
                    <parameter name="Select spectra to merge">across samples</parameter>
                    <parameter name="m/z merge mode">weighted average (remove outliers)</parameter>
                    <parameter name="intensity merge mode">sum intensities</parameter>
                    <parameter name="Expected mass deviation"/>
                    <parameter name="Cosine threshold (%)">0.7</parameter>
                    <parameter name="Peak count threshold (%)">0.2</parameter>
                    <parameter name="Isolation window offset (m/z)">0.0</parameter>
                    <parameter name="Isolation window width (m/z)">3.0</parameter>
                </parameter>
            </parameters>
        </module>
        <module class="io.github.mzmine.modules.dataanalysis.clustering.ClusteringModule">
            <parameters>
                <parameter name="Feature lists"/>
                <parameter name="Peak measurement type"/>
                <parameter name="Raw data files" type="ALL_FILES"/>
                <parameter name="Feature list rows">
                    <selection/>
                </parameter>
                <parameter name="Clustering algorithm">
                    <module name="Density-based clusterer">
                        <parameter name="Number of iterantions">3</parameter>
                        <parameter name="Visualization type"/>
                    </module>
                    <module name="Farthest first clusterer">
                        <parameter name="Visualization type"/>
                        <parameter name="Number of clusters to generate">3</parameter>
                    </module>
                    <module name="Simple KMeans">
                        <parameter name="Visualization type"/>
                        <parameter name="Number of clusters to generate">3</parameter>
                    </module>
                    <module name="Hierarchical clusterer">
                        <parameter name="Type of link"/>
                        <parameter name="Distances"/>
                    </module>
                </parameter>
                <parameter name="Type of data"/>
            </parameters>
        </module>
        <module class="io.github.mzmine.modules.dataprocessing.featdet_chromatogrambuilder.ChromatogramBuilderModule">
            <parameters>
                <parameter name="Raw data files"/>
                <parameter name="Scans">
                    <ms_level>1</ms_level>
                </parameter>
                <parameter name="Mass list"/>
                <parameter name="Min time span (min)"/>
                <parameter name="Min height"/>
                <parameter name="m/z tolerance"/>
                <parameter name="Suffix">chromatograms</parameter>
            </parameters>
        </module>
        <module class="io.github.mzmine.modules.visualization.spectra.simplespectra.spectraidentification.sumformula.SumFormulaSpectraSearchModule">
            <parameters>
                <parameter name="Charge"/>
                <parameter name="Ionization type"/>
                <parameter name="m/z tolerance"/>
                <parameter name="Noise level">0.0</parameter>
                <parameter name="Elements">N[0-50]P[0-30]S[0-30]C[0-100]H[0-100]O[0-50]</parameter>
                <parameter name="Element count heuristics">
                    <parameter name="H/C ratio">true</parameter>
                    <parameter name="NOPS/C ratios">true</parameter>
                    <parameter name="Multiple element counts">true</parameter>
                </parameter>
                <parameter name="RDBE restrictions">
                    <parameter name="RDBE range">
                        <min>-1.0</min>
                        <max>40.0</max>
                    </parameter>
                    <parameter name="RDBE must be an integer">true</parameter>
                </parameter>
            </parameters>
        </module>
        <module class="io.github.mzmine.modules.dataprocessing.id_fragmentsearch.FragmentSearchModule">
            <parameters>
                <parameter name="Feature lists"/>
                <parameter name="Retention time tolerance"/>
                <parameter name="m/z tolerance of MS2 data"/>
                <parameter name="Max fragment peak height">0.5</parameter>
                <parameter name="Min MS2 peak height"/>
            </parameters>
        </module>
        <module class="io.github.mzmine.modules.dataanalysis.significance.SignificanceModule">
            <parameters>
                <parameter name="Feature lists"/>
                <parameter name="Sample parameter"/>
            </parameters>
        </module>
        <module class="io.github.mzmine.modules.dataanalysis.rtmzplots.logratioplot.LogratioPlotModule">
            <parameters>
                <parameter name="Feature lists"/>
                <parameter name="Group one"/>
                <parameter name="Group two"/>
                <parameter name="Peak measurement type"/>
            </parameters>
        </module>
        <module class="io.github.mzmine.modules.dataprocessing.filter_peakfilter.PeakFilterModule">
            <parameters>
                <parameter name="Feature lists"/>
                <parameter name="Name suffix">filtered</parameter>
                <parameter name="Duration" selected="false">
                    <min>0.0</min>
                    <max>10.0</max>
                </parameter>
                <parameter name="Area" selected="false">
                    <min>0.0</min>
                    <max>1.0E7</max>
                </parameter>
                <parameter name="Height" selected="false">
                    <min>0.0</min>
                    <max>1.0E7</max>
                </parameter>
                <parameter name="# data points" selected="false">
                    <min>8</min>
                    <max>30</max>
                </parameter>
                <parameter name="FWHM" selected="false">
                    <min>0.0</min>
                    <max>2.0</max>
                </parameter>
                <parameter name="Tailing factor" selected="false">
                    <min>0.5</min>
                    <max>2.0</max>
                </parameter>
                <parameter name="Asymmetry factor" selected="false">
                    <min>0.5</min>
                    <max>2.0</max>
                </parameter>
                <parameter name="Keep only features with MS/MS scan"/>
                <parameter name="Remove source feature list after filtering"/>
            </parameters>
        </module>
        <module class="io.github.mzmine.modules.io.projectsave.ProjectSaveAsModule">
            <parameters>
                <parameter name="Project file"/>
            </parameters>
        </module>
        <module class="io.github.mzmine.modules.dataprocessing.filter_baselinecorrection.BaselineCorrectionModule">
            <parameters>
                <parameter name="Raw data files"/>
                <parameter name="Filename suffix">baseline-corrected</parameter>
                <parameter name="Chromatogram type">TIC</parameter>
                <parameter name="MS level">1</parameter>
                <parameter name="Use m/z bins">true</parameter>
                <parameter name="m/z bin width">1.0</parameter>
                <parameter name="Correction method">
                    <module name="Asymmetric baseline corrector">
                        <parameter name="Smoothing"/>
                        <parameter name="Asymmetry">0.001</parameter>
                    </module>
                    <module name="RollingBall baseline corrector">
                        <parameter name="wm (number of scans)"/>
                        <parameter name="ws (number of scans)"/>
                    </module>
                    <module name="PeakDetection baseline corrector">
                        <parameter name="left (number of scans)">1</parameter>
                        <parameter name="right (number of scans)">1</parameter>
                        <parameter name="lwin (number of scans)">1</parameter>
                        <parameter name="rwin (number of scans)">1</parameter>
                        <parameter name="snminimum">0.0</parameter>
                        <parameter name="mono">0.0</parameter>
                        <parameter name="multiplier">1.0</parameter>
                    </module>
                    <module name="RubberBand baseline corrector">
                        <parameter name="noise">0.0</parameter>
                        <parameter name="auto noise">false</parameter>
                        <parameter name="df">0.0</parameter>
                        <parameter name="spline">true</parameter>
                        <parameter name="bend factor">0.0</parameter>
                    </module>
                    <module name="Local minima + LOESS baseline corrector">
                        <parameter name="method">loess</parameter>
                        <parameter name="bw">0.0</parameter>
                        <parameter name="breaks"/>
                        <parameter name="break width (number of scans)">-1</parameter>
                        <parameter name="qntl">0.0</parameter>
                    </module>
                </parameter>
                <parameter name="R engine">RCaller</parameter>
                <parameter name="Remove source file after baseline correction">true</parameter>
            </parameters>
        </module>
        <module class="io.github.mzmine.modules.visualization.spectra.simplespectra.spectraidentification.onlinedatabase.OnlineDBSpectraSearchModule">
            <parameters>
                <parameter name="Database">
                    <module name="KEGG"/>
                    <module name="PubChem"/>
                    <module name="Human Metabolome (HMDB)"/>
                    <module name="Yeast Metabolome (YMDB)"/>
                    <module name="LipidMaps"/>
                    <module name="MassBank.eu"/>
                    <module name="ChemSpider">
                        <parameter name="ChemSpider API key"/>
                    </module>
                    <module name="MetaCyc"/>
                </parameter>
                <parameter name="Ionization type"/>
                <parameter name="m/z tolerance"/>
                <parameter name="Noise level"/>
            </parameters>
        </module>
        <module class="io.github.mzmine.modules.visualization.tic.TICVisualizerModule">
            <parameters>
                <parameter name="Raw data files"/>
                <parameter name="Scans">
                    <ms_level>1</ms_level>
                </parameter>
                <parameter name="Plot type"/>
                <parameter name="m/z"/>
                <parameter name="Peaks"/>
                <parameter name="Window state">
                    <maximized>false</maximized>
                </parameter>
            </parameters>
        </module>
        <module class="io.github.mzmine.modules.dataprocessing.gapfill_peakfinder.PeakFinderModule">
            <parameters>
                <parameter name="Feature lists" type="GUI_SELECTED_PEAKLISTS"/>
                <parameter name="Name suffix">gap-filled</parameter>
                <parameter name="Intensity tolerance">0.5</parameter>
                <parameter name="m/z tolerance">
                    <absolutetolerance>0.02</absolutetolerance>
                    <ppmtolerance>10.0</ppmtolerance>
                </parameter>
                <parameter name="Retention time tolerance" type="absolute">0.5</parameter>
                <parameter name="RT correction">false</parameter>
                <parameter name="Parallel (never combined with RT correction)">false</parameter>
                <parameter name="Remove original feature list">false</parameter>
            </parameters>
        </module>
        <module class="io.github.mzmine.modules.dataanalysis.projectionplots.CDAPlotModule">
            <parameters>
                <parameter name="Feature lists"/>
                <parameter name="Raw data files" type="ALL_FILES"/>
                <parameter name="Coloring type"/>
                <parameter name="Peak measurement type"/>
                <parameter name="X-axis component"/>
                <parameter name="Y-axis component">2</parameter>
            </parameters>
        </module>
        <module class="io.github.mzmine.modules.dataprocessing.filter_peakcomparisonrowfilter.PeakComparisonRowFilterModule">
            <parameters>
                <parameter name="Feature lists"/>
                <parameter name="Name suffix">filtered</parameter>
                <parameter name="1st peak column to compare (zero indexed)">0</parameter>
                <parameter name="2nd peak column to compare (zero indexed)">1</parameter>
                <parameter name="Fold change range : log2(peak1/peak2)" selected="false">
                    <min>-5.0</min>
                    <max>5.0</max>
                </parameter>
                <parameter name="m/z difference range : peak1 to peak2 (ppm)" selected="false">
                    <min>-5.0</min>
                    <max>5.0</max>
                </parameter>
                <parameter name="RT difference range : peak1 to peak2 (min)" selected="false">
                    <min>-0.2</min>
                    <max>0.2</max>
                </parameter>
                <parameter name="Remove source feature list after filtering"/>
            </parameters>
        </module>
        <module class="io.github.mzmine.modules.tools.isotopeprediction.IsotopePatternCalculator">
            <parameters>
                <parameter name="Formula"/>
                <parameter name="Charge">1</parameter>
                <parameter name="Polarity"/>
                <parameter name="Minimum abundance">0.001</parameter>
            </parameters>
        </module>
        <module class="io.github.mzmine.modules.dataprocessing.filter_groupms2.GroupMS2Module">
            <parameters>
                <parameter name="Feature lists"/>
                <parameter name="Retention time tolerance"/>
                <parameter name="m/z tolerance"/>
                <parameter name="Limit by RT edges">false</parameter>
            </parameters>
        </module>
        <module class="io.github.mzmine.modules.visualization.infovisualizer.InfoVisualizerModule">
            <parameters>
                <parameter name="Window state">
                    <maximized>false</maximized>
                </parameter>
            </parameters>
        </module>
        <module class="io.github.mzmine.modules.io.xmlexport.XMLExportModule">
            <parameters>
                <parameter name="Feature lists"/>
                <parameter name="Filename"/>
                <parameter name="Compressed file"/>
            </parameters>
        </module>
        <module class="io.github.mzmine.modules.dataprocessing.filter_rowsfilter.RowsFilterModule">
            <parameters>
                <parameter name="Feature lists"/>
                <parameter name="Name suffix">filtered</parameter>
                <parameter name="Minimum peaks in a row" selected="false"/>
                <parameter name="Minimum peaks in an isotope pattern" selected="false"/>
                <parameter name="m/z" selected="false"/>
                <parameter name="Retention time" selected="false"/>
                <parameter name="Peak duration range" selected="false">
                    <min>0.0</min>
                    <max>10.0</max>
                </parameter>
                <parameter name="Chromatographic FWHM" selected="false">
                    <min>0.0</min>
                    <max>1.0</max>
                </parameter>
                <parameter name="Charge" selected="false"/>
                <parameter name="Kendrick mass defect">
                    <parameter name="Kendrick mass defect">
                        <min>0.0</min>
                        <max>1.0</max>
                    </parameter>
                    <parameter name="Kendrick mass base"/>
                    <parameter name="Shift">0.0</parameter>
                    <parameter name="Charge">1</parameter>
                    <parameter name="Divisor">1</parameter>
                    <parameter name="Use Remainder of Kendrick mass">false</parameter>
                </parameter>
                <parameter name="Parameter"/>
                <parameter name="Only identified?"/>
                <parameter name="Text in identity" selected="false"/>
                <parameter name="Text in comment" selected="false"/>
                <parameter name="Keep or remove rows"/>
                <parameter name="Keep only peaks with MS2 scan (GNPS)"/>
                <parameter name="Reset the peak number ID"/>
                <parameter name="Remove source feature list after filtering"/>
            </parameters>
        </module>
        <module class="io.github.mzmine.modules.io.exportscans.ExportScansFromRawFilesModule">
            <parameters>
                <parameter name="Raw data files"/>
                <parameter name="Scans"/>
                <parameter name="Mass list" selected="false"/>
                <parameter name="File"/>
                <parameter name="Format">mgf</parameter>
            </parameters>
        </module>
        <module class="io.github.mzmine.modules.dataprocessing.filter_cropfilter.CropFilterModule">
            <parameters>
                <parameter name="Raw data files"/>
                <parameter name="Scans"/>
                <parameter name="m/z"/>
                <parameter name="Suffix">filtered</parameter>
                <parameter name="Remove source file after filtering"/>
            </parameters>
        </module>
        <module class="io.github.mzmine.modules.dataprocessing.gapfill_peakfinder.multithreaded.MultiThreadPeakFinderModule">
            <parameters>
                <parameter name="Feature lists"/>
                <parameter name="Name suffix">gap-filled</parameter>
                <parameter name="Intensity tolerance"/>
                <parameter name="m/z tolerance"/>
                <parameter name="Retention time tolerance"/>
                <parameter name="Remove original feature list"/>
            </parameters>
        </module>
        <module class="io.github.mzmine.modules.dataprocessing.filter_scanfilters.ScanFiltersModule">
            <parameters>
                <parameter name="Raw data files"/>
                <parameter name="Scans">
                    <ms_level>1</ms_level>
                </parameter>
                <parameter name="Suffix">filtered</parameter>
                <parameter name="Filter">
                    <module name="Savitzky-Golay filter">
                        <parameter name="Number of datapoints"/>
                    </module>
                    <module name="Mean filter">
                        <parameter name="Window length"/>
                    </module>
                    <module name="Resampling filter">
                        <parameter name="m/z bin length"/>
                    </module>
                    <module name="Round resampling filter">
                        <parameter name="Sum duplicate intensities">false</parameter>
                        <parameter name="Remove zero intensity m/z peaks">true</parameter>
                    </module>
                </parameter>
                <parameter name="Remove source file after filtering"/>
            </parameters>
        </module>
        <module class="io.github.mzmine.modules.dataprocessing.featdet_massdetection.MassDetectionModule">
            <parameters>
                <parameter name="Raw data files" type="GUI_SELECTED_FILES"/>
                <parameter name="Scans">
                    <retention_time>
                        <min>2.0</min>
                        <max>15.0</max>
                    </retention_time>
                    <ms_level>1</ms_level>
                    <scan_definition/>
                </parameter>
                <parameter name="Mass detector" selected="Exact mass">
                    <module name="Centroid">
                        <parameter name="Noise level"/>
                    </module>
                    <module name="Exact mass">
                        <parameter name="Noise level">5000.0</parameter>
                    </module>
                    <module name="Local maxima">
                        <parameter name="Noise level"/>
                    </module>
                    <module name="Recursive threshold">
                        <parameter name="Noise level"/>
                        <parameter name="Min m/z peak width"/>
                        <parameter name="Max m/z peak width"/>
                    </module>
                    <module name="Wavelet transform">
                        <parameter name="Noise level"/>
                        <parameter name="Scale level"/>
                        <parameter name="Wavelet window size (%)"/>
                    </module>
                </parameter>
                <parameter name="Mass list name">masses</parameter>
                <parameter name="Output netCDF filename (optional)" selected="false"/>
            </parameters>
        </module>
        <module class="io.github.mzmine.modules.visualization.spectra.simplespectra.datapointprocessing.isotopes.deisotoper.DPPIsotopeGrouperModule">
            <parameters>
                <parameter name="m/z tolerance"/>
                <parameter name="Monotonic shape">false</parameter>
                <parameter name="Maximum charge">1</parameter>
                <parameter name="Representative isotope">Most intense</parameter>
                <parameter name="Remove non-isotopes">false</parameter>
                <parameter name="Display results">false</parameter>
                <parameter name="Dataset color">0,255,0,255</parameter>
            </parameters>
        </module>
        <module class="io.github.mzmine.modules.dataprocessing.featdet_smoothing.SmoothingModule">
            <parameters>
                <parameter name="Feature lists" type="GUI_SELECTED_PEAKLISTS"/>
                <parameter name="Filename suffix">smoothed</parameter>
                <parameter name="Filter width">13</parameter>
                <parameter name="Remove original feature list">false</parameter>
            </parameters>
        </module>
        <module class="io.github.mzmine.modules.io.spectraldbsubmit.LibrarySubmitModule">
            <parameters>
                <parameter name="Mass list"/>
                <parameter name="Noise level">0.0</parameter>
                <parameter name="Min signals">3</parameter>
                <parameter name="Sorting">MAX TIC</parameter>
                <parameter name="Local file" selected="false"/>
                <parameter name="Export GNPS json file">true</parameter>
                <parameter name="Export NIST msp file">true</parameter>
                <parameter name="Submit to GNPS (MS2)" selected="true"/>
            </parameters>
        </module>
        <module class="io.github.mzmine.modules.visualization.featurelisttable.export.MSMSExportModule">
            <parameters>
                <parameter name="Output file"/>
                <parameter name="Mass list"/>
            </parameters>
        </module>
        <module class="io.github.mzmine.modules.dataprocessing.id_onlinecompounddb.OnlineDBSearchModule">
            <parameters>
                <parameter name="Feature lists"/>
                <parameter name="Database">
                    <module name="KEGG"/>
                    <module name="PubChem"/>
                    <module name="Human Metabolome (HMDB)"/>
                    <module name="Yeast Metabolome (YMDB)"/>
                    <module name="LipidMaps"/>
                    <module name="MassBank.eu"/>
                    <module name="ChemSpider">
                        <parameter name="ChemSpider API key"/>
                    </module>
                    <module name="MetaCyc"/>
                </parameter>
                <parameter name="Ionization type"/>
                <parameter name="Number of results">20</parameter>
                <parameter name="m/z tolerance"/>
                <parameter name="Isotope pattern filter">
                    <parameter name="Isotope m/z tolerance"/>
                    <parameter name="Minimum absolute intensity"/>
                    <parameter name="Minimum score"/>
                </parameter>
            </parameters>
        </module>
        <module class="io.github.mzmine.modules.dataprocessing.id_ms2search.Ms2SearchModule">
            <parameters>
                <parameter name="Feature List 1"/>
                <parameter name="Feature List 2"/>
                <parameter name="Mass list"/>
                <parameter name="m/z tolerance"/>
                <parameter name="Minimum MS2 ion intensity"/>
                <parameter name="Minimum ion(s) matched per MS2 comparison"/>
                <parameter name="Minimum spectral match score to report"/>
            </parameters>
        </module>
        <module class="io.github.mzmine.modules.tools.sortpeaklists.SortPeakListsModule">
            <parameters>
                <parameter name="Feature lists"/>
            </parameters>
        </module>
        <module class="io.github.mzmine.modules.dataprocessing.id_formulapredictionpeaklist.FormulaPredictionPeakListModule">
            <parameters>
                <parameter name="Charge"/>
                <parameter name="Ionization type"/>
                <parameter name="Feature lists"/>
                <parameter name="m/z tolerance"/>
                <parameter name="Max best formulas per peak"/>
                <parameter name="Elements">N[0-50]P[0-30]S[0-30]C[0-100]H[0-100]O[0-50]</parameter>
                <parameter name="Element count heuristics">
                    <parameter name="H/C ratio">true</parameter>
                    <parameter name="NOPS/C ratios">true</parameter>
                    <parameter name="Multiple element counts">true</parameter>
                </parameter>
                <parameter name="RDBE restrictions">
                    <parameter name="RDBE range">
                        <min>-1.0</min>
                        <max>40.0</max>
                    </parameter>
                    <parameter name="RDBE must be an integer">true</parameter>
                </parameter>
                <parameter name="Isotope pattern filter">
                    <parameter name="Isotope m/z tolerance"/>
                    <parameter name="Minimum absolute intensity"/>
                    <parameter name="Minimum score"/>
                </parameter>
                <parameter name="MS/MS filter">
                    <parameter name="Mass list"/>
                    <parameter name="MS/MS m/z tolerance"/>
                    <parameter name="MS/MS score threshold"/>
                </parameter>
            </parameters>
        </module>
        <module class="io.github.mzmine.modules.visualization.spectra.simplespectra.SpectraVisualizerModule">
            <parameters>
                <parameter name="Raw data files"/>
                <parameter name="Scan number"/>
                <parameter name="Window state">
                    <maximized>false</maximized>
                </parameter>
            </parameters>
        </module>
        <module class="io.github.mzmine.modules.dataprocessing.align_ransac.RansacAlignerModule">
            <parameters>
                <parameter name="Feature lists"/>
                <parameter name="Feature list name">Aligned feature list</parameter>
                <parameter name="m/z tolerance"/>
                <parameter name="RT tolerance"/>
                <parameter name="RT tolerance after correction"/>
                <parameter name="RANSAC iterations"/>
                <parameter name="Minimum number of points"/>
                <parameter name="Threshold value"/>
                <parameter name="Linear model"/>
                <parameter name="Require same charge state"/>
            </parameters>
        </module>
        <module class="io.github.mzmine.modules.dataprocessing.filter_merge.RawFileMergeModule">
            <parameters>
                <parameter name="Raw data files"/>
                <parameter name="Mode">MERGE PATTERN</parameter>
                <parameter name="Grouping identifier position">AFTER LAST</parameter>
                <parameter name="Position marker">_</parameter>
                <parameter name="MS2 marker" selected="false"/>
                <parameter name="Suffix to new name">_merged</parameter>
            </parameters>
        </module>
        <module class="io.github.mzmine.modules.dataprocessing.align_adap3.ADAP3AlignerModule">
            <parameters>
                <parameter name="Feature lists"/>
                <parameter name="Min confidence (between 0 and 1)">0.7</parameter>
                <parameter name="Retention time tolerance"/>
                <parameter name="m/z tolerance"/>
                <parameter name="Score threshold (between 0 and 1)">0.75</parameter>
                <parameter name="Score weight (between 0 and 1)">0.1</parameter>
                <parameter name="Retention time similarity">Retention Time Difference (fast)</parameter>
                <parameter name="Aligned Feature List Name">Aligned feature list</parameter>
            </parameters>
        </module>
        <module class="io.github.mzmine.modules.dataprocessing.featdet_ADAPchromatogrambuilder.ADAPChromatogramBuilderModule">
            <parameters>
                <parameter name="Raw data files" type="GUI_SELECTED_FILES"/>
                <parameter name="Scans">
                    <retention_time>
                        <min>2.0</min>
                        <max>15.0</max>
                    </retention_time>
                    <ms_level>1</ms_level>
                    <scan_definition/>
                </parameter>
                <parameter name="Mass list">masses</parameter>
                <parameter name="Min group size in # of scans">5</parameter>
                <parameter name="Group intensity threshold">5000.0</parameter>
                <parameter name="Min highest intensity">6000.0</parameter>
                <parameter name="m/z tolerance">
                    <absolutetolerance>0.001</absolutetolerance>
                    <ppmtolerance>5.0</ppmtolerance>
                </parameter>
                <parameter name="Suffix">chromatograms</parameter>
            </parameters>
        </module>
        <module class="io.github.mzmine.modules.visualization.spectra.simplespectra.spectraidentification.spectraldatabase.SpectraIdentificationSpectralDatabaseModule">
            <parameters>
                <parameter name="Mass list"/>
                <parameter name="Database file"/>
                <parameter name="Use precursor m/z" selected="false">0.0</parameter>
                <parameter name="Precursor m/z tolerance">
                    <absolutetolerance>0.001</absolutetolerance>
                    <ppmtolerance>5.0</ppmtolerance>
                </parameter>
                <parameter name="Minimum ion intensity">0.0</parameter>
                <parameter name="13C deisotoping" selected="true">
                    <parameter name="m/z tolerance"/>
                    <parameter name="Monotonic shape"/>
                    <parameter name="Maximum charge"/>
                </parameter>
                <parameter name="Min matched isotope signals" selected="false">3</parameter>
                <parameter name="Crop spectra to m/z overlap">true</parameter>
                <parameter name="Spectral m/z tolerance">
                    <absolutetolerance>0.0015</absolutetolerance>
                    <ppmtolerance>10.0</ppmtolerance>
                </parameter>
                <parameter name="Minimum  matched signals">20</parameter>
                <parameter name="Similarity">
                    <module name="Weighted dot-product cosine">
                        <parameter name="Weights">MassBank (mz^2 * I^0.5)</parameter>
                        <parameter name="Minimum  cos similarity">0.7</parameter>
                        <parameter name="Remove unmatched signals">false</parameter>
                    </module>
                    <module name="Composite dot -product identity (similar to NIST search)">
                        <parameter name="Weights">MassBank (mz^2 * I^0.5)</parameter>
                        <parameter name="Minimum  cos similarity">0.7</parameter>
                        <parameter name="Remove unmatched signals">false</parameter>
                    </module>
                </parameter>
            </parameters>
        </module>
        <module class="io.github.mzmine.modules.dataprocessing.featdet_peakextender.PeakExtenderModule">
            <parameters>
                <parameter name="Feature lists"/>
                <parameter name="Name suffix">extended</parameter>
                <parameter name="m/z tolerance"/>
                <parameter name="Min height"/>
                <parameter name="Remove original peaklist"/>
            </parameters>
        </module>
        <module class="io.github.mzmine.modules.io.mztabimport.MzTabImportModule">
            <parameters>
                <parameter name="mzTab files"/>
                <parameter name="Import raw data files?"/>
            </parameters>
        </module>
        <module class="io.github.mzmine.modules.dataanalysis.rtmzplots.cvplot.CVPlotModule">
            <parameters>
                <parameter name="Feature lists"/>
                <parameter name="Data files"/>
                <parameter name="Peak measurement type"/>
            </parameters>
        </module>
        <module class="io.github.mzmine.modules.dataprocessing.id_isotopepeakscanner.IsotopePeakScannerModule">
            <parameters>
                <parameter name="Feature lists"/>
                <parameter name="m/z tolerance"/>
                <parameter name="Check RT"/>
                <parameter name="Retention time tolerance"/>
                <parameter name="Chemical formula"/>
                <parameter name="Auto carbon">
                    <parameter name="Min. carbon">15</parameter>
                    <parameter name="Max. carbon">25</parameter>
                    <parameter name="Min. pattern size">2</parameter>
                </parameter>
                <parameter name="Charge">1</parameter>
                <parameter name="Min. pattern intensity">0.01</parameter>
                <parameter name="Merge width(m/z)">5.0E-4</parameter>
                <parameter name="Show pattern preview"/>
                <parameter name="Minimum height">10000.0</parameter>
                <parameter name="Check intensity ratios">true</parameter>
                <parameter name="Minimun rating">0.9</parameter>
                <parameter name="Rating type">Highest intensity</parameter>
                <parameter name="Calculate accurate average" selected="false"/>
                <parameter name="Name suffix">auto</parameter>
            </parameters>
        </module>
        <module class="io.github.mzmine.modules.visualization.spectra.msms.MsMsVisualizerModule">
            <parameters>
                <parameter name="Raw data files"/>
                <parameter name="Retention time"/>
                <parameter name="m/z"/>
                <parameter name="Intensity"/>
                <parameter name="Normalize by"/>
                <parameter name="Min. MS/MS peak intensity"/>
                <parameter name="Peak threshold settings">
                    <mode>ALL_PEAKS</mode>
                    <intensityThreshold>0.0</intensityThreshold>
                    <topPeaksThreshold>0</topPeaksThreshold>
                </parameter>
                <parameter name="Window state">
                    <maximized>false</maximized>
                </parameter>
            </parameters>
        </module>
        <module class="io.github.mzmine.modules.dataprocessing.id_sirius.SiriusProcessingModule">
            <parameters>
                <parameter name="Feature lists"/>
                <parameter name="Ionization type"/>
                <parameter name="m/z tolerance"/>
                <parameter name="Elements">N[0-100]F[0-0]P[0-100]I[0-0]S[0-100]C[0-100]H[0-100]B[0-0]O[0-100]Se[0-0]Br[0-0]Cl[0-0]</parameter>
                <parameter name="Mass list"/>
                <parameter name="Amount of Sirius candidates to return">1</parameter>
                <parameter name="Amount of FingerId results to return">1</parameter>
                <parameter name="Amount of parallel jobs">8</parameter>
                <parameter name="Timer for Sirius Identification job (sec)">30</parameter>
            </parameters>
        </module>
        <module class="io.github.mzmine.modules.io.adapmspexport.AdapMspExportModule">
            <parameters>
                <parameter name="Feature lists"/>
                <parameter name="Filename"/>
                <parameter name="Add retention time" selected="true">RT</parameter>
                <parameter name="Add ANOVA p-value (if calculated)" selected="true">ANOVA_P_VALUE</parameter>
                <parameter name="Integer m/z" selected="false">Merging mode: Maximum</parameter>
            </parameters>
        </module>
        <module class="io.github.mzmine.modules.visualization.vankrevelendiagram.VanKrevelenDiagramModule">
            <parameters>
                <parameter name="Feature lists"/>
                <parameter name="Peaks"/>
                <parameter name="Z-Axis"/>
                <parameter name="Z-Axis scale"/>
                <parameter name="Range for z-Axis scale"/>
                <parameter name="Heatmap style"/>
                <parameter name="Window state">
                    <maximized>false</maximized>
                </parameter>
            </parameters>
        </module>
        <module class="io.github.mzmine.modules.visualization.mzhistogram.MZDistributionHistoModule">
            <parameters>
                <parameter name="Raw data files"/>
                <parameter name="Scans">
                    <ms_level>1</ms_level>
                </parameter>
                <parameter name="Mass list"/>
                <parameter name="m/z"/>
                <parameter name="Retention time" selected="false"/>
                <parameter name="m/z bin width"/>
            </parameters>
        </module>
        <module class="io.github.mzmine.modules.dataprocessing.id_precursordbsearch.PrecursorDBSearchModule">
            <parameters>
                <parameter name="Feature lists"/>
                <parameter name="Spectral database file (MS/MS)"/>
                <parameter name="Precursor m/z tolerance">
                    <absolutetolerance>0.001</absolutetolerance>
                    <ppmtolerance>5.0</ppmtolerance>
                </parameter>
                <parameter name="Retention time tolerance" selected="false"/>
            </parameters>
        </module>
        <module class="io.github.mzmine.modules.visualization.spectra.simplespectra.spectraidentification.customdatabase.CustomDBSpectraSearchModule">
            <parameters>
                <parameter name="Database file"/>
                <parameter name="Field separator">,</parameter>
                <parameter name="Field order">
                    <item>m/z</item>
                    <item>Identity</item>
                </parameter>
                <parameter name="Ignore first line"/>
                <parameter name="m/z tolerance"/>
                <parameter name="Noise level"/>
            </parameters>
        </module>
        <module class="io.github.mzmine.modules.tools.kovats.KovatsIndexExtractionModule">
            <parameters>
                <parameter name="Last file"/>
                <parameter name="Picked Kovats values"/>
                <parameter name="Raw data files"/>
                <parameter name="m/z"/>
                <parameter name="Retention time"/>
                <parameter name="Min intensity">0.0</parameter>
                <parameter name="Ratio top/edge">3.0</parameter>
                <parameter name="Min Kovats">8</parameter>
                <parameter name="Max Kovats">24</parameter>
                <parameter name="Kovats"/>
            </parameters>
        </module>
        <module class="io.github.mzmine.modules.io.csvexport.CSVExportModule">
            <parameters>
                <parameter name="Feature lists"/>
                <parameter name="Filename"/>
                <parameter name="Field separator">,</parameter>
                <parameter name="Export common elements"/>
                <parameter name="Export data file elements"/>
                <parameter name="Export quantitation results and other information">false</parameter>
                <parameter name="Identification separator">;</parameter>
                <parameter name="Filter rows">ALL</parameter>
            </parameters>
        </module>
        <module class="io.github.mzmine.modules.dataprocessing.filter_extractscans.ExtractScansModule">
            <parameters>
                <parameter name="Mass list" selected="false"/>
                <parameter name="Raw data files"/>
                <parameter name="Output directory"/>
                <parameter name="Use center time">true</parameter>
                <parameter name="Scan count to be exported">30</parameter>
                <parameter name="Center time">0.0</parameter>
                <parameter name="Time range"/>
                <parameter name="Auto search max">true</parameter>
                <parameter name="Export header">true</parameter>
            </parameters>
        </module>
        <module class="io.github.mzmine.modules.dataprocessing.featdet_chromatogramdeconvolution.DeconvolutionModule">
            <parameters>
                <parameter name="Feature lists" type="GUI_SELECTED_PEAKLISTS"/>
                <parameter name="Suffix">deconvoluted</parameter>
                <parameter name="Algorithm" selected="Wavelets (ADAP)">
                    <module name="Baseline cut-off">
                        <parameter name="Min peak height"/>
                        <parameter name="Peak duration range (min)">
                            <min>0.0</min>
                            <max>10.0</max>
                        </parameter>
                        <parameter name="Baseline level"/>
                    </module>
                    <module name="Noise amplitude">
                        <parameter name="Min peak height"/>
                        <parameter name="Peak duration range (min)">
                            <min>0.0</min>
                            <max>10.0</max>
                        </parameter>
                        <parameter name="Amplitude of noise"/>
                    </module>
                    <module name="Savitzky-Golay">
                        <parameter name="Min peak height"/>
                        <parameter name="Peak duration range (min)">
                            <min>0.0</min>
                            <max>10.0</max>
                        </parameter>
                        <parameter name="Derivative threshold level"/>
                    </module>
                    <module name="Local minimum search">
                        <parameter name="Chromatographic threshold"/>
                        <parameter name="Search minimum in RT range (min)"/>
                        <parameter name="Minimum relative height"/>
                        <parameter name="Minimum absolute height"/>
                        <parameter name="Min ratio of peak top/edge"/>
                        <parameter name="Peak duration range (min)">
                            <min>0.0</min>
                            <max>10.0</max>
                        </parameter>
                    </module>
                    <module name="Wavelets (XCMS)">
                        <parameter name="S/N threshold">10.0</parameter>
                        <parameter name="Wavelet scales">
                            <min>0.25</min>
                            <max>5.0</max>
                        </parameter>
                        <parameter name="Peak duration range">
                            <min>0.0</min>
                            <max>10.0</max>
                        </parameter>
                        <parameter name="Peak integration method">Use smoothed data</parameter>
                        <parameter name="R engine">RCaller</parameter>
                    </module>
                    <module name="Wavelets (ADAP)">
                        <parameter name="S/N threshold">10.0</parameter>
                        <parameter name="S/N estimator" selected="Intensity window SN">
                            <module name="Intensity window SN"/>
                            <module name="Wavelet Coeff. SN">
                                <parameter name="Peak width mult.">3.0</parameter>
                                <parameter name="abs(wavelet coeffs.)">true</parameter>
                            </module>
                        </parameter>
                        <parameter name="min feature height">6000.0</parameter>
                        <parameter name="coefficient/area threshold">110.0</parameter>
                        <parameter name="Peak duration range">
                            <min>0.02</min>
                            <max>2.0</max>
                        </parameter>
                        <parameter name="RT wavelet range">
                            <min>0.05</min>
                            <max>0.1</max>
                        </parameter>
                    </module>
                </parameter>
                <parameter measure="MEDIAN" name="m/z center calculation" weighting="NONE">CenterFunction</parameter>
                <parameter name="m/z range for MS2 scan pairing (Da)" selected="false"/>
                <parameter name="RT range for MS2 scan pairing (min)" selected="false"/>
                <parameter name="Remove original feature list">true</parameter>
            </parameters>
        </module>
        <module class="io.github.mzmine.modules.visualization.twod.TwoDVisualizerModule">
            <parameters>
                <parameter name="Type of plot"/>
                <parameter name="Raw data files"/>
                <parameter name="Scans">
                    <ms_level>1</ms_level>
                </parameter>
                <parameter name="m/z"/>
                <parameter name="Peak threshold settings">
                    <mode>ALL_PEAKS</mode>
                    <intensityThreshold>0.0</intensityThreshold>
                    <topPeaksThreshold>0</topPeaksThreshold>
                </parameter>
                <parameter name="Window state">
                    <maximized>false</maximized>
                </parameter>
            </parameters>
        </module>
        <module class="io.github.mzmine.modules.dataprocessing.featdet_manual.XICManualPickerModule">
            <parameters>
                <parameter name="Retention time"/>
                <parameter name="m/z range"/>
            </parameters>
        </module>
        <module class="io.github.mzmine.modules.io.xmlimport.XMLImportModule">
            <parameters>
                <parameter name="Filename"/>
            </parameters>
        </module>
        <module class="io.github.mzmine.modules.dataprocessing.filter_neutralloss.NeutralLossFilterModule">
            <parameters>
                <parameter name="Feature lists"/>
                <parameter name="m/z tolerance"/>
                <parameter name="Check RT"/>
                <parameter name="Retention time tolerance"/>
                <parameter name="Minimum height">0.0</parameter>
                <parameter name="Neutral loss (m/z)">0.0</parameter>
                <parameter name="Molecule"/>
                <parameter name="Name suffix">auto</parameter>
            </parameters>
        </module>
        <module class="io.github.mzmine.modules.dataanalysis.projectionplots.SammonsPlotModule">
            <parameters>
                <parameter name="Feature lists"/>
                <parameter name="Raw data files" type="ALL_FILES"/>
                <parameter name="Coloring type"/>
                <parameter name="Peak measurement type"/>
                <parameter name="X-axis component"/>
                <parameter name="Y-axis component">2</parameter>
            </parameters>
        </module>
        <module class="io.github.mzmine.modules.dataprocessing.id_customdbsearch.CustomDBSearchModule">
            <parameters>
                <parameter name="Feature lists"/>
                <parameter name="Database file"/>
                <parameter name="Field separator">,</parameter>
                <parameter name="Field order">
                    <item>ID</item>
                    <item>m/z</item>
                    <item>Retention time (min)</item>
                    <item>Identity</item>
                    <item>Formula</item>
                </parameter>
                <parameter name="Ignore first line"/>
                <parameter name="m/z tolerance"/>
                <parameter name="Retention time tolerance"/>
            </parameters>
        </module>
        <module class="io.github.mzmine.modules.visualization.scatterplot.ScatterPlotVisualizerModule">
            <parameters>
                <parameter name="Feature lists"/>
                <parameter name="Window state">
                    <maximized>false</maximized>
                </parameter>
            </parameters>
        </module>
        <module class="io.github.mzmine.modules.dataprocessing.featdet_shapemodeler.ShapeModelerModule">
            <parameters>
                <parameter name="Feature lists"/>
                <parameter name="Suffix">shaped peaks</parameter>
                <parameter name="Mass resolution"/>
                <parameter name="Shape model"/>
                <parameter name="Remove original feature list"/>
            </parameters>
        </module>
        <module class="io.github.mzmine.modules.dataprocessing.norm_rtcalibration.RTCalibrationModule">
            <parameters>
                <parameter name="Feature lists" type="GUI_SELECTED_PEAKLISTS"/>
                <parameter name="Name suffix">normalized</parameter>
                <parameter name="m/z tolerance">
                    <absolutetolerance>0.001</absolutetolerance>
                    <ppmtolerance>5.0</ppmtolerance>
                </parameter>
                <parameter name="Retention time tolerance" type="absolute">0.1</parameter>
                <parameter name="Minimum standard intensity">500.0</parameter>
                <parameter name="Remove original feature list">true</parameter>
            </parameters>
        </module>
        <module class="io.github.mzmine.modules.visualization.neutralloss.NeutralLossVisualizerModule">
            <parameters>
                <parameter name="Raw data files"/>
                <parameter name="X axis"/>
                <parameter name="Retention time"/>
                <parameter name="Precursor m/z"/>
                <parameter name="Fragments"/>
                <parameter name="Window state">
                    <maximized>false</maximized>
                </parameter>
            </parameters>
        </module>
        <module class="io.github.mzmine.modules.dataprocessing.id_gnpsresultsimport.GNPSResultsImportModule">
            <parameters>
                <parameter name="Feature lists"/>
                <parameter name="GNPS graphml file"/>
            </parameters>
        </module>
        <module class="io.github.mzmine.modules.io.metaboanalystexport.MetaboAnalystExportModule">
            <parameters>
                <parameter name="Feature lists"/>
                <parameter name="Filename"/>
                <parameter name="Grouping parameter"/>
            </parameters>
        </module>
        <module class="io.github.mzmine.modules.dataprocessing.filter_clearannotations.PeaklistClearAnnotationsModule">
            <parameters>
                <parameter name="Feature lists"/>
                <parameter name="Clear identities?"/>
                <parameter name="Clear comments?"/>
            </parameters>
        </module>
        <module class="io.github.mzmine.modules.dataprocessing.featdet_targeted.TargetedPeakDetectionModule">
            <parameters>
                <parameter name="Raw data files"/>
                <parameter name="MS level">1</parameter>
                <parameter name="Name suffix">detectedPeak</parameter>
                <parameter name="Feature list file"/>
                <parameter name="Field separator">,</parameter>
                <parameter name="Ignore first line"/>
                <parameter name="Intensity tolerance"/>
                <parameter name="Noise level"/>
                <parameter name="m/z tolerance"/>
                <parameter name="Retention time tolerance"/>
            </parameters>
        </module>
        <module class="io.github.mzmine.modules.io.exportscans.ExportScansModule">
            <parameters>
                <parameter name="File"/>
                <parameter name="Mass list" selected="false"/>
                <parameter name="Format">mgf</parameter>
            </parameters>
        </module>
        <module class="io.github.mzmine.modules.dataprocessing.featdet_manual.ManualPeakPickerModule">
            <parameters>
                <parameter name="Retention time"/>
                <parameter name="m/z range"/>
            </parameters>
        </module>
        <module class="io.github.mzmine.modules.dataanalysis.heatmaps.HeatMapModule">
            <parameters>
                <parameter name="Feature lists"/>
                <parameter name="Output name"/>
                <parameter name="Output file type">pdf</parameter>
                <parameter name="Sample parameter"/>
                <parameter name="Group of reference"/>
                <parameter name="Only identified rows">false</parameter>
                <parameter name="Use peak area">true</parameter>
                <parameter name="Scaling">true</parameter>
                <parameter name="Log">true</parameter>
                <parameter name="Show control samples">true</parameter>
                <parameter name="P-value legend">true</parameter>
                <parameter name="Size p-value legend">5</parameter>
                <parameter name="Height">10</parameter>
                <parameter name="Width">10</parameter>
                <parameter name="Column margin">10</parameter>
                <parameter name="Row margin">10</parameter>
                <parameter name="R engine">RCaller</parameter>
            </parameters>
        </module>
        <module class="io.github.mzmine.modules.io.gnpsexport.fbmn.GnpsFbmnExportAndSubmitModule">
            <parameters>
                <parameter name="Feature lists"/>
                <parameter name="Filename"/>
                <parameter name="Mass list"/>
                <parameter name="Merge MS/MS (experimental)" selected="true">
                    <parameter name="Select spectra to merge">across samples</parameter>
                    <parameter name="m/z merge mode">weighted average (remove outliers)</parameter>
                    <parameter name="intensity merge mode">sum intensities</parameter>
                    <parameter name="Expected mass deviation"/>
                    <parameter name="Cosine threshold (%)">0.7</parameter>
                    <parameter name="Peak count threshold (%)">0.2</parameter>
                    <parameter name="Isolation window offset (m/z)">0.0</parameter>
                    <parameter name="Isolation window width (m/z)">3.0</parameter>
                </parameter>
                <parameter name="Filter rows">ONLY WITH MS2</parameter>
                <parameter name="Submit to GNPS">
                    <parameter name="Meta data file" selected="false"/>
                    <parameter name="Presets">HIGHRES</parameter>
                    <parameter name="Job title"/>
                    <parameter name="Open website">true</parameter>
                </parameter>
                <parameter name="Open folder">false</parameter>
            </parameters>
        </module>
        <module class="io.github.mzmine.modules.visualization.spectra.simplespectra.datapointprocessing.DataPointProcessingManager">
            <parameters>
                <parameter differentiatemsn="false" name="Processing queues">
                    <queuewrapper mslevel="MS"/>
                    <queuewrapper mslevel="MS/MS"/>
                </parameter>
                <parameter name="Enable Processing">false</parameter>
            </parameters>
        </module>
        <module class="io.github.mzmine.modules.dataprocessing.norm_standardcompound.StandardCompoundNormalizerModule">
            <parameters>
                <parameter name="Feature lists"/>
                <parameter name="Name suffix">normalized</parameter>
                <parameter name="Normalization type"/>
                <parameter name="Peak measurement type"/>
                <parameter name="m/z vs RT balance"/>
                <parameter name="Standard compounds"/>
                <parameter name="Remove original feature list"/>
            </parameters>
        </module>
        <module class="io.github.mzmine.modules.tools.mzrangecalculator.MzRangeMassCalculatorModule">
            <parameters>
                <parameter name="m/z"/>
                <parameter name="m/z tolerance"/>
            </parameters>
        </module>
        <module class="io.github.mzmine.modules.visualization.histogram.HistogramVisualizerModule">
            <parameters>
                <parameter name="Feature lists"/>
                <parameter name="Raw data files"/>
                <parameter name="Plotted data"/>
                <parameter name="Number of bins">10</parameter>
                <parameter name="Window state">
                    <maximized>false</maximized>
                </parameter>
            </parameters>
        </module>
        <module class="io.github.mzmine.modules.dataprocessing.id_spectraldbsearch.sort.SortSpectralDBIdentitiesModule">
            <parameters>
                <parameter name="Feature lists"/>
                <parameter name="Minimum similarity score" selected="false">0.75</parameter>
            </parameters>
        </module>
        <module class="io.github.mzmine.modules.dataprocessing.id_adductsearch.AdductSearchModule">
            <parameters>
                <parameter name="Feature lists"/>
                <parameter name="RT tolerance"/>
                <parameter name="Adducts">
                    <adduct mass_difference="21.9825" name="[M+Na-H]" selected="false"/>
                    <adduct mass_difference="37.9559" name="[M+K-H]" selected="false"/>
                    <adduct mass_difference="21.9694" name="[M+Mg-2H]" selected="false"/>
                    <adduct mass_difference="17.0265" name="[M+NH3]" selected="false"/>
                    <adduct mass_difference="97.9769" name="[M+H3PO4]" selected="false"/>
                    <adduct mass_difference="97.9674" name="[M+H2SO4]" selected="false"/>
                    <adduct mass_difference="62.0004" name="[M+H2CO3]" selected="false"/>
                    <adduct mass_difference="5.0" name="[(Deuterium)]glycerol" selected="false"/>
                </parameter>
                <parameter name="m/z tolerance"/>
                <parameter name="Max relative adduct peak height">0.5</parameter>
            </parameters>
        </module>
        <module class="io.github.mzmine.modules.dataprocessing.id_formulaprediction.FormulaPredictionModule">
            <parameters>
                <parameter name="Neutral mass"/>
                <parameter name="m/z tolerance"/>
                <parameter name="Elements">N[0-50]P[0-30]S[0-30]C[0-100]H[0-100]O[0-50]</parameter>
                <parameter name="Element count heuristics">
                    <parameter name="H/C ratio">true</parameter>
                    <parameter name="NOPS/C ratios">true</parameter>
                    <parameter name="Multiple element counts">true</parameter>
                </parameter>
                <parameter name="RDBE restrictions">
                    <parameter name="RDBE range">
                        <min>-1.0</min>
                        <max>40.0</max>
                    </parameter>
                    <parameter name="RDBE must be an integer">true</parameter>
                </parameter>
                <parameter name="Isotope pattern filter">
                    <parameter name="Isotope m/z tolerance"/>
                    <parameter name="Minimum absolute intensity"/>
                    <parameter name="Minimum score"/>
                </parameter>
                <parameter name="MS/MS filter">
                    <parameter name="Mass list"/>
                    <parameter name="MS/MS m/z tolerance"/>
                    <parameter name="MS/MS score threshold"/>
                </parameter>
            </parameters>
        </module>
        <module class="io.github.mzmine.modules.io.mztabexport.MzTabExportModule">
            <parameters>
                <parameter name="Feature lists"/>
                <parameter name="Filename"/>
                <parameter name="Include all peaks"/>
            </parameters>
        </module>
        <module class="io.github.mzmine.modules.visualization.featurelisttable.export.IsotopePatternExportModule">
            <parameters>
                <parameter name="Output file"/>
            </parameters>
        </module>
        <module class="io.github.mzmine.modules.dataprocessing.featdet_msms.MsMsPeakPickerModule">
            <parameters>
                <parameter name="Raw data files"/>
                <parameter name="Scans">
                    <ms_level>2</ms_level>
                </parameter>
                <parameter name="m/z window"/>
                <parameter name="Time window"/>
            </parameters>
        </module>
        <module class="io.github.mzmine.modules.tools.sortdatafiles.SortDataFilesModule">
            <parameters>
                <parameter name="Raw data files"/>
            </parameters>
        </module>
        <module class="io.github.mzmine.modules.tools.msmsspectramerge.MsMsSpectraMergeModule">
            <parameters>
                <parameter name="Select spectra to merge">across samples</parameter>
                <parameter name="m/z merge mode">weighted average (remove outliers)</parameter>
                <parameter name="intensity merge mode">sum intensities</parameter>
                <parameter name="Expected mass deviation"/>
                <parameter name="Cosine threshold (%)">0.7</parameter>
                <parameter name="Peak count threshold (%)">0.2</parameter>
                <parameter name="Isolation window offset (m/z)">0.0</parameter>
                <parameter name="Isolation window width (m/z)">3.0</parameter>
            </parameters>
        </module>
        <module class="io.github.mzmine.modules.dataprocessing.id_lipididentification.LipidSearchModule">
            <parameters>
                <parameter name="Feature lists"/>
                <parameter name="Lipid classes"/>
                <parameter name="Minimum number of carbon in chains"/>
                <parameter name="Maximum number of carbon in chains"/>
                <parameter name="Minimum number of double bonds"/>
                <parameter name="Maximum number of double bonds"/>
                <parameter name="Ionization method"/>
                <parameter name="m/z tolerance MS1 level:"/>
                <parameter name="Search for lipid class specific fragments in MS/MS spectra"/>
                <parameter name="m/z tolerance MS2 level:"/>
                <parameter name="Noise level for MS/MS scans">0.0</parameter>
                <parameter name="Search for lipid modification"/>
                <parameter name="Lipid modifications"/>
            </parameters>
        </module>
        <module class="io.github.mzmine.modules.visualization.spectra.simplespectra.datapointprocessing.identification.sumformulaprediction.DPPSumFormulaPredictionModule">
            <parameters>
                <parameter name="Charge"/>
                <parameter name="Noise level"/>
                <parameter name="Ionization type"/>
                <parameter name="m/z tolerance"/>
                <parameter name="Elements">N[0-50]P[0-30]S[0-30]C[0-100]H[0-100]O[0-50]</parameter>
                <parameter name="Element count heuristics">
                    <parameter name="H/C ratio">true</parameter>
                    <parameter name="NOPS/C ratios">true</parameter>
                    <parameter name="Multiple element counts">true</parameter>
                </parameter>
                <parameter name="RDBE restrictions">
                    <parameter name="RDBE range">
                        <min>-1.0</min>
                        <max>40.0</max>
                    </parameter>
                    <parameter name="RDBE must be an integer">true</parameter>
                </parameter>
                <parameter name="Isotope pattern filter">
                    <parameter name="Isotope m/z tolerance"/>
                    <parameter name="Minimum absolute intensity"/>
                    <parameter name="Minimum score"/>
                </parameter>
                <parameter name="Display results (#)" selected="false">1</parameter>
                <parameter name="Dataset color">0,0,0,255</parameter>
            </parameters>
        </module>
        <module class="io.github.mzmine.modules.visualization.spectra.simplespectra.spectraidentification.lipidsearch.LipidSpectraSearchModule">
            <parameters>
                <parameter name="Lipid classes"/>
                <parameter name="Minimum number of carbon in chains"/>
                <parameter name="Maximum number of carbon in chains"/>
                <parameter name="Minimum number of double bonds"/>
                <parameter name="Maximum number of double bonds"/>
                <parameter name="Ionization method"/>
                <parameter name="m/z tolerance:"/>
                <parameter name="Noise level">0.0</parameter>
                <parameter name="Search for lipid modification"/>
                <parameter name="Lipid modifications"/>
            </parameters>
        </module>
        <module class="io.github.mzmine.modules.dataanalysis.projectionplots.PCAPlotModule">
            <parameters>
                <parameter name="Feature lists"/>
                <parameter name="Raw data files" type="ALL_FILES"/>
                <parameter name="Coloring type"/>
                <parameter name="Peak measurement type"/>
                <parameter name="X-axis component"/>
                <parameter name="Y-axis component">2</parameter>
            </parameters>
        </module>
        <module class="io.github.mzmine.modules.io.projectsave.ProjectSaveModule">
            <parameters>
                <parameter name="Project file"/>
            </parameters>
        </module>
        <module class="io.github.mzmine.modules.dataprocessing.filter_scansmoothing.ScanSmoothingModule">
            <parameters>
                <parameter name="Raw data files"/>
                <parameter name="Suffix">smooth</parameter>
                <parameter name="Time (min)">0.05</parameter>
                <parameter name="Scan span">5</parameter>
                <parameter name="MZ tolerance">0.05</parameter>
                <parameter name="MZ min points">3</parameter>
                <parameter name="Min height">0.0</parameter>
                <parameter name="Remove prev files">false</parameter>
            </parameters>
        </module>
        <module class="io.github.mzmine.modules.dataprocessing.featdet_gridmass.GridMassModule">
            <parameters>
                <parameter name="Raw data files"/>
                <parameter name="Scans">
                    <ms_level>1</ms_level>
                </parameter>
                <parameter name="Suffix">chromatograms</parameter>
                <parameter name="Minimum height">20.0</parameter>
                <parameter name="M/Z Tolerance">0.1</parameter>
                <parameter name="Min-max width time (min)">
                    <min>0.1</min>
                    <max>3.0</max>
                </parameter>
                <parameter name="Smoothing time (min)">0.05</parameter>
                <parameter name="Smoothing m/z">0.05</parameter>
                <parameter name="False+: Intensity similarity ratio">0.5</parameter>
                <parameter name="False+: Ignore times">0-0</parameter>
                <parameter name="Debugging level">No debug</parameter>
            </parameters>
        </module>
        <module class="io.github.mzmine.modules.visualization.fx3d.Fx3DVisualizerModule">
            <parameters>
                <parameter name="Raw data files"/>
                <parameter name="Scans">
                    <ms_level>1</ms_level>
                </parameter>
                <parameter name="m/z"/>
                <parameter name="Features"/>
                <parameter name="Retention time resolution">500</parameter>
                <parameter name="m/z resolution">500</parameter>
                <parameter name="Window state">
                    <maximized>false</maximized>
                </parameter>
            </parameters>
        </module>
        <module class="io.github.mzmine.modules.dataprocessing.gapfill_samerange.SameRangeGapFillerModule">
            <parameters>
                <parameter name="Feature lists"/>
                <parameter name="Name suffix">gap-filled</parameter>
                <parameter name="m/z tolerance"/>
                <parameter name="Remove original feature list"/>
            </parameters>
        </module>
        <module class="io.github.mzmine.modules.dataprocessing.filter_deisotoper.IsotopeGrouperModule">
            <parameters>
                <parameter name="Feature lists" type="GUI_SELECTED_PEAKLISTS"/>
                <parameter name="Name suffix">deisotoped</parameter>
                <parameter name="m/z tolerance">
                    <absolutetolerance>0.001</absolutetolerance>
                    <ppmtolerance>5.0</ppmtolerance>
                </parameter>
                <parameter name="Retention time tolerance" type="absolute">0.2</parameter>
                <parameter name="Monotonic shape">true</parameter>
                <parameter name="Maximum charge">5</parameter>
                <parameter name="Representative isotope">Most intense</parameter>
                <parameter name="Remove original peaklist">true</parameter>
            </parameters>
        </module>
        <module class="io.github.mzmine.modules.visualization.intensityplot.IntensityPlotModule">
            <parameters>
                <parameter name="Feature lists"/>
                <parameter name="Raw data files"/>
                <parameter name="X axis value"/>
                <parameter name="Y axis value"/>
                <parameter name="Peaks"/>
                <parameter name="Window state">
                    <maximized>false</maximized>
                </parameter>
            </parameters>
        </module>
        <module class="io.github.mzmine.modules.dataprocessing.id_camera.CameraSearchModule">
            <parameters>
                <parameter name="Feature lists"/>
                <parameter name="FWHM sigma">0.2</parameter>
                <parameter name="FWHM percentage">0.01</parameter>
                <parameter name="Isotopes max. charge">3</parameter>
                <parameter name="Isotopes max. per cluster">4</parameter>
                <parameter name="Isotopes mass tolerance"/>
                <parameter name="Correlation threshold">0.9</parameter>
                <parameter name="Correlation p-value">0.05</parameter>
                <parameter name="Ionization Polarity">positive</parameter>
                <parameter name="Do not split isotopes">true</parameter>
                <parameter name="Order">Perform Isotope search before Shape correlation</parameter>
                <parameter name="Create new list">true</parameter>
                <parameter name="Group peaks by">Isotope ID</parameter>
                <parameter name="Include singletons">false</parameter>
                <parameter name="Suffix">CAMERA</parameter>
                <parameter name="R engine">RCaller</parameter>
            </parameters>
        </module>
        <module class="io.github.mzmine.modules.tools.isotopepatternpreview.IsotopePatternPreviewModule">
            <parameters>
                <parameter name="Chemical formula"/>
                <parameter name="Minimum intensity">0.001</parameter>
                <parameter name="Merge width (m/z)">5.0E-5</parameter>
                <parameter name="Charge">1</parameter>
            </parameters>
        </module>
        <module class="io.github.mzmine.modules.tools.mzrangecalculator.MzRangeFormulaCalculatorModule">
            <parameters>
                <parameter name="Formula"/>
                <parameter name="Ionization type"/>
                <parameter name="Charge">1</parameter>
                <parameter name="m/z tolerance"/>
            </parameters>
        </module>
        <module class="io.github.mzmine.modules.visualization.spectra.simplespectra.datapointprocessing.massdetection.DPPMassDetectionModule">
            <parameters>
                <parameter name="Mass detector">
                    <module name="Centroid">
                        <parameter name="Noise level"/>
                    </module>
                    <module name="Exact mass">
                        <parameter name="Noise level">5000.0</parameter>
                    </module>
                    <module name="Local maxima">
                        <parameter name="Noise level"/>
                    </module>
                    <module name="Recursive threshold">
                        <parameter name="Noise level"/>
                        <parameter name="Min m/z peak width"/>
                        <parameter name="Max m/z peak width"/>
                    </module>
                    <module name="Wavelet transform">
                        <parameter name="Noise level"/>
                        <parameter name="Scale level"/>
                        <parameter name="Wavelet window size (%)"/>
                    </module>
                </parameter>
                <parameter name="Display results">false</parameter>
                <parameter name="Dataset color">0,255,255,255</parameter>
            </parameters>
        </module>
        <module class="io.github.mzmine.modules.batchmode.BatchModeModule">
            <parameters>
                <parameter name="Batch queue"/>
                <parameter name="Last used files"/>
            </parameters>
        </module>
        <module class="io.github.mzmine.modules.io.projectclose.ProjectCloseModule">
            <parameters/>
        </module>
        <module class="io.github.mzmine.modules.visualization.featurelisttable.PeakListTableModule">
            <parameters>
                <parameter name="Common columns">
                    <item>ID</item>
                    <item>m/z</item>
                    <item>RT</item>
                    <item>Identity</item>
                    <item>Comment</item>
                    <item>Peak shape</item>
                    <widths>100:100:100:100:100:100</widths>
                </parameter>
                <parameter name="Data file columns">
                    <item>Status</item>
                    <item>Height</item>
                    <item>Area</item>
                    <widths>100:100:100:100:100:100:100:100:100:100:100:100:100:100:100</widths>
                </parameter>
                <parameter name="Row height">30</parameter>
                <parameter name="Peak shape normalization"/>
                <parameter name="Window state">
                    <position>0:0</position>
                    <size>1176:552</size>
                    <maximized>false</maximized>
                </parameter>
            </parameters>
        </module>
        <module class="io.github.mzmine.modules.io.adapmgfexport.AdapMgfExportModule">
            <parameters>
                <parameter name="Feature lists"/>
                <parameter name="Filename"/>
                <parameter name="Representative m/z">As in feature table</parameter>
                <parameter name="Fractional m/z values">false</parameter>
                <parameter name="Merging Mode">Maximum</parameter>
            </parameters>
        </module>
        <module class="io.github.mzmine.modules.dataprocessing.featdet_shoulderpeaksfilter.ShoulderPeaksFilterModule">
            <parameters>
                <parameter name="Raw data files"/>
                <parameter name="Mass list"/>
                <parameter name="Mass resolution"/>
                <parameter name="Peak model function"/>
                <parameter name="Suffix">filtered</parameter>
                <parameter name="Remove original mass list"/>
            </parameters>
        </module>
        <module class="io.github.mzmine.modules.dataprocessing.id_nist.NistMsSearchModule">
            <parameters>
                <parameter name="Feature lists"/>
                <parameter name="NIST MS Search directory"/>
                <parameter name="Ionization method"/>
                <parameter name="Spectrum RT tolerance"/>
                <parameter name="Max. peaks per spectrum">10</parameter>
                <parameter name="Must have same identities">true</parameter>
                <parameter name="Min. match factor">800</parameter>
                <parameter name="Min. reverse match factor">800</parameter>
            </parameters>
        </module>
        <module class="io.github.mzmine.modules.dataprocessing.featdet_adap3decompositionV1_5.ADAP3DecompositionV1_5Module">
            <parameters>
                <parameter name="Feature lists"/>
                <parameter name="Min cluster distance (min)">0.01</parameter>
                <parameter name="Min cluster size">2</parameter>
                <parameter name="Min cluster intensity">500.0</parameter>
                <parameter name="Find shared peaks">false</parameter>
                <parameter name="Min edge-to-height ratio">0.3</parameter>
                <parameter name="Min delta-to-height ratio">0.2</parameter>
                <parameter name="Min sharpness">10.0</parameter>
                <parameter name="Shape-similarity tolerance (0..90)">18.0</parameter>
                <parameter name="Choice of Model Peak based on">Shaprness</parameter>
                <parameter name="Exclude m/z-values"/>
                <parameter name="Suffix">ADAP-GC 3 Peak Decomposition</parameter>
                <parameter name="Remove original feature list"/>
            </parameters>
        </module>
        <module class="io.github.mzmine.modules.dataprocessing.id_spectraldbsearch.LocalSpectralDBSearchModule">
            <parameters>
                <parameter name="Feature lists"/>
                <parameter name="MassList"/>
                <parameter name="Spectral database file"/>
                <parameter name="MS level">2</parameter>
                <parameter name="Check all scans (only for MS2)">false</parameter>
                <parameter name="Precursor m/z tolerance">
                    <absolutetolerance>0.001</absolutetolerance>
                    <ppmtolerance>5.0</ppmtolerance>
                </parameter>
                <parameter name="Minimum ion intensity">0.0</parameter>
                <parameter name="13C deisotoping" selected="true">
                    <parameter name="m/z tolerance"/>
                    <parameter name="Monotonic shape"/>
                    <parameter name="Maximum charge"/>
                </parameter>
                <parameter name="Min matched isotope signals" selected="false">3</parameter>
                <parameter name="Crop spectra to m/z overlap">true</parameter>
                <parameter name="Spectral m/z tolerance">
                    <absolutetolerance>0.0015</absolutetolerance>
                    <ppmtolerance>10.0</ppmtolerance>
                </parameter>
                <parameter name="Retention time tolerance" selected="false"/>
                <parameter name="Minimum  matched signals">4</parameter>
                <parameter name="Similarity">
                    <module name="Weighted dot-product cosine">
                        <parameter name="Weights">MassBank (mz^2 * I^0.5)</parameter>
                        <parameter name="Minimum  cos similarity">0.7</parameter>
                        <parameter name="Remove unmatched signals">false</parameter>
                    </module>
                    <module name="Composite dot -product identity (similar to NIST search)">
                        <parameter name="Weights">MassBank (mz^2 * I^0.5)</parameter>
                        <parameter name="Minimum  cos similarity">0.7</parameter>
                        <parameter name="Remove unmatched signals">false</parameter>
                    </module>
                </parameter>
            </parameters>
        </module>
        <module class="io.github.mzmine.modules.dataprocessing.filter_alignscans.AlignScansModule">
            <parameters>
                <parameter name="Raw data files"/>
                <parameter name="Suffix">align</parameter>
                <parameter name="Horizontal Scans">5</parameter>
                <parameter name="Max Vertical Alignment">1</parameter>
                <parameter name="Minimum height">1000.0</parameter>
                <parameter name="Correlation in Log">false</parameter>
                <parameter name="Remove prev files">false</parameter>
            </parameters>
        </module>
        <module class="io.github.mzmine.modules.visualization.spectra.spectralmatchresults.SpectraIdentificationResultsModule">
            <parameters>
                <parameter name="file"/>
                <parameter name="Show export all">true</parameter>
                <parameter name="Show export pdf">true</parameter>
                <parameter name="Show export emf">true</parameter>
                <parameter name="Show export eps">true</parameter>
                <parameter name="Show export svg">true</parameter>
            </parameters>
        </module>
        <module class="io.github.mzmine.modules.dataprocessing.id_complexsearch.ComplexSearchModule">
            <parameters>
                <parameter name="Feature lists"/>
                <parameter name="Ionization method"/>
                <parameter name="Retention time tolerance"/>
                <parameter name="m/z tolerance"/>
                <parameter name="Max complex peak height">0.5</parameter>
            </parameters>
        </module>
        <module class="io.github.mzmine.modules.io.gnpsexport.gc.GnpsGcExportAndSubmitModule">
            <parameters>
                <parameter name="Feature lists"/>
                <parameter name="Filename"/>
                <parameter name="Representative m/z">As in feature table</parameter>
                <parameter name="Feature intensity">Peak area</parameter>
                <parameter name="Open folder">false</parameter>
            </parameters>
        </module>
    </modules>
</configuration>
