# Supplementary material for: Targeted and Untargeted Metabolomic Analyses Reveal Organ Specificity of Specialized Metabolites in the Model Grass Brachypodium distachyon
Source: Molecules. 2022 Sep 13;27(18):5956. doi: 10.3390/molecules27185956 (PMC9506550; doi:10.3390/molecules27185956)
Supplement: Supplementary file 1 [file molecules-27-05956-s001.zip › Supplementary Table S1.xlsx]

## Sheet: pathway results
Supplementary Table S1. Scoring of pathway mapping on the basis of MetaboAnalyst 5.0 conducted on all m/z signals from combined positive and negative ionization mode; “pathway results” sheet contains scoring of pathway enrichment; “name map” sheet contains metabolites annotation to Kyoto Encyclopedia of Genes and Genomes (KEGG) database and conversion of KEGG identifiers to Human Metabolome Datab…
	Total	Hits	FDR	Impact
Flavonoid biosynthesis	47	40	4.31e-06	0.75288
Galactose metabolism	27	25	2.72e-05	1
Amino sugar and nucleotide sugar metabolism	50	39	0.00017722	0.92767
Valine, leucine and isoleucine biosynthesis	22	20	0.00042631	0.99998
Pentose and glucuronate interconversions	17	16	0.00097119	1
Flavone and flavonol biosynthesis	12	12	0.0015389	1
2-Oxocarboxylic acid metabolism	12	12	0.0015389	1
Pentose phosphate pathway	19	16	0.010995	0.9532
Purine metabolism	63	42	0.011504	0.67941
Tyrosine metabolism	18	15	0.014584	0.79191
Ascorbate and aldarate metabolism	18	15	0.014584	0.8806
Vitamin B6 metabolism	11	10	0.026026	0.96153
Phenylalanine, tyrosine and tryptophan biosynthesis	10	3	0.027039	0.7938
Caffeine metabolism	10	9	0.043654	0
Pantothenate and CoA biosynthesis	23	17	0.050837	0.58317
Cysteine and methionine metabolism	46	30	0.054699	0.69666
C5-Branched dibasic acid metabolism	6	6	0.057027	1
Biosynthesis of secondary metabolites - other antibiotics	6	6	0.057027	1
Phenylpropanoid biosynthesis	35	23	0.097038	0.52402
Riboflavin metabolism	11	9	0.097796	0.84446
One carbon pool by folate	8	7	0.10819	0.45239
Alanine, aspartate and glutamate metabolism	10	1	0.15319	0.52878
Starch and sucrose metabolism	22	15	0.15319	0.83039
Histidine metabolism	17	12	0.1716	0.65116
Carbon fixation in photosynthetic organisms	21	14	0.21194	0.65955
Lysine biosynthesis	9	7	0.22844	0.9054
Pyrimidine metabolism	38	23	0.22844	0.63812
Arginine biosynthesis	18	12	0.25575	0.62621
Fructose and mannose metabolism	20	13	0.26974	0.77366
Cyanoamino acid metabolism	26	16	0.31247	0.73215
Betalain biosynthesis	3	3	0.3197	1
Zeatin biosynthesis	21	13	0.37263	0.36451
Diterpenoid biosynthesis	47	26	0.44484	0.58478
Citrate cycle (TCA cycle)	20	12	0.47241	0.55676
Thiamine metabolism	22	13	0.47241	0.74566
Stilbenoid, diarylheptanoid and gingerol biosynthesis	5	1	0.54518	0.5
Nicotinate and nicotinamide metabolism	13	8	0.55346	0.43434
Porphyrin and chlorophyll metabolism	47	25	0.5669	0.88273
Terpenoid backbone biosynthesis	29	16	0.5669	0.49053
Glyoxylate and dicarboxylate metabolism	29	16	0.5669	0.78362
Anthocyanin biosynthesis	6	4	0.64268	0
Isoquinoline alkaloid biosynthesis	6	4	0.64268	0.99999
Monobactam biosynthesis	8	5	0.65128	1
Phenylalanine metabolism	12	7	0.65655	0.76923
Arginine and proline metabolism	28	14	0.92794	0.5818
Glycolysis / Gluconeogenesis	26	13	0.92794	0.4721
Pyruvate metabolism	22	11	0.94066	0.47706
Cutin, suberine and wax biosynthesis	6	1	1	0.75
Tryptophan metabolism	23	11	1	0.5862
Taurine and hypotaurine metabolism	6	3	1	0
Propanoate metabolism	20	9	1	0.3829
beta-Alanine metabolism	18	8	1	0.39682
Arachidonic acid metabolism	12	5	1	0
Butanoate metabolism	17	7	1	0.22727
Phosphonate and phosphinate metabolism	5	2	1	0
Biosynthesis of secondary metabolites - unclassified	5	2	1	1
Sulfur metabolism	15	6	1	0.41436
Folate biosynthesis	27	11	1	0.37397
Ubiquinone and other terpenoid-quinone biosynthesis	35	14	1	0.35583
Inositol phosphate metabolism	28	11	1	0.31171
Glycerolipid metabolism	21	8	1	0.33098
Monoterpenoid biosynthesis	6	2	1	0
alpha-Linolenic acid metabolism	27	10	1	0.37655
Nitrogen metabolism	12	4	1	0.23529
Synthesis and degradation of ketone bodies	4	1	1	0
Sesquiterpenoid and triterpenoid biosynthesis	8	2	1	0
Tropane, piperidine and pyridine alkaloid biosynthesis	4	1	1	0
Carotenoid biosynthesis	42	15	1	0.63216
Limonene and pinene degradation	5	1	1	0
Phosphatidylinositol signaling system	26	8	1	0.19358
Lysine degradation	18	5	1	0.5
Valine, leucine and isoleucine degradation	17	1	1	0.19367
Glutathione metabolism	27	8	1	0.52755
Brassinosteroid biosynthesis	20	5	1	0.09259
Aminoacyl-tRNA biosynthesis	46	14	1	0.16667
Selenocompound metabolism	13	2	1	0
Glycosylphosphatidylinositol (GPI)-anchor biosynthesis	13	2	1	0.20571
Biosynthesis of unsaturated fatty acids	22	4	1	0
Fatty acid elongation	23	4	1	0
Sphingolipid metabolism	17	2	1	0.22596
Biotin metabolism	18	2	1	0.13846
Steroid biosynthesis	40	8	1	0.10651
Glycerophospholipid metabolism	37	7	1	0.19586
Fatty acid degradation	37	4	1	0.0619
N-Glycan biosynthesis	35	3	1	0.07466
Fatty acid biosynthesis	56	4	1	0

## Sheet: name map
Query	Match	HMDB	PubChem	KEGG	SMILES
C00089	Sucrose	HMDB0000258	5988	C00089	C([C@@H]1[C@H]([C@@H]([C@H]([C@H](O1)O[C@]2([C@H]([C@@H]([C@H](O2)CO)O)O)CO)O)O)O)O
C05402	Melibiose	HMDB0000048	440658	C05402	OC[C@H]1O[C@H](OC[C@H]2O[C@H](O)[C@H](O)[C@@H](O)[C@H]2O)[C@@H](O)[C@@H](O)[C@@H]1O
C05400	Isomaltose	HMDB0002923	440656	C05400	OC[C@H]1O[C@H](OC[C@H]2O[C@H](O)[C@H](O)[C@@H](O)[C@H]2O)[C@@H](O)[C@@H](O)[C@@H]1O
C01235	Beta-Cortol	HMDB0005821	246164	C01235	C[C@]12CC[C@H](C[C@H]1CC[C@@H]3[C@@H]2[C@H](C[C@]4([C@H]3CC[C@@]4([C@@H](CO)O)O)C)O)O
C00243	Alpha-Lactose	HMDB0000186	84571	C00243	C([C@@H]1[C@@H]([C@@H]([C@H]([C@@H](O1)O[C@@H]2[C@H](O[C@@H]([C@@H]([C@H]2O)O)O)CO)O)O)O)O
C00185	1-beta-D-Glucopyranosyl-4-D-glucopyranose	MA3TEM061	3485	C00185	C(CC=O)CC=O
C01083	Trehalose	HMDB0000975	7427	C01083	C([C@@H]1[C@H]([C@@H]([C@H]([C@H](O1)O[C@@H]2[C@@H]([C@H]([C@@H]([C@H](O2)CO)O)O)O)O)O)O)O
C00208	D-Maltose	HMDB0000163	10991489	C00208	C([C@@H]1[C@H]([C@@H]([C@H]([C@H](O1)O[C@@H]2[C@H](O[C@@H]([C@H]([C@H]2O)O)O)CO)O)O)O)O
C06429	Docosahexaenoic acid	HMDB0002183	445580	C06429	CC/C=C\C/C=C\C/C=C\C/C=C\C/C=C\C/C=C\CCC(=O)O
C19620	9,10-Epoxystearic acid	HMDB0061650	15868	C19620	CCCCCCCCC1OC1CCCCCCCC(O)=O
C04043	3,4-Dihydroxyphenylacetaldehyde	HMDB0003791	119219	C04043	C1=CC(=C(C=C1CC=O)O)O
C05852	Ortho-Hydroxyphenylacetic acid	HMDB0000669	11970	C05852	C1=CC=C(C(=C1)CC(=O)O)O
C03541	Tetrahydrofolyl-[Glu](n)	HMDB0006826	45479706	C03541	C1C(NC2=C(N1)NC(=NC2=O)N)CNC3=CC=C(C=C3)C(=O)NC(CCC(=O)NC(CCC(=O)NC(CCC(=O)O)C(=O)O)C(=O)O)C(=O)O
C01246	Dolichyl b-D-glucosyl phosphate	HMDB0001054	22833557	C01246	CC(CC/C=C(/C)\CCC=C(C)C)CCOP(=O)(O)O[C@H]1[C@@H]([C@H]([C@@H]([C@H](O1)CO)O)O)O
C21016	Ophthalmic acid	HMDB0005765	7018721	C21016	CC[C@@H](C(=O)NCC(=O)O)NC(=O)CC[C@@H](C(=O)O)N
C05623	Quercetin 3-glucoside	HMDB0037362	5280804	C05623	OC[C@H]1O[C@@H](OC2=C(OC3=C(C(O)=CC(O)=C3)C2=O)C2=CC=C(O)C(O)=C2)[C@H](O)[C@@H](O)[C@@H]1O
C05770	Coproporphyrin III	HMDB0000570	NA	C05770	CC1=C(CCC(O)=O)/C2=C/C3=N/C(=C\C4=C(C)C(CCC(O)=O)=C(N4)/C=C4\N=C(\C=C\1/N\2)C(C)=C4CCC(O)=O)/C(CCC(O)=O)=C3C
C01750	Quercitrin	HMDB0033751	5280459	C01750	C[C@H]1[C@@H]([C@H]([C@H]([C@@H](O1)OC2=C(OC3=CC(=CC(=C3C2=O)O)O)C4=CC(=C(C=C4)O)O)O)O)O
C12249	Kaempferol-3-O-glucoside	HMDB0037429	5282102	C12249	OC[C@H]1O[C@@H](OC2=C(OC3=CC(O)=CC(O)=C3C2=O)C2=CC=C(O)C=C2)[C@H](O)[C@@H](O)[C@@H]1O
C16911	Afzelin	NA	96023404	C16911	NA
C01419	Cysteinylglycine	HMDB0000078	439498	C01419	C([C@@H](C(=O)NCC(=O)O)N)S
C17621	10-Hydroxygeraniol	METPA1453	NA	C17621	NA
C11526	5-Diphosphoinositol pentakisphosphate	HMDB0006229	NA	C11526	OP(O)(=O)O[C@@H]1[C@H](OP(O)(O)=O)[C@@H](OP(O)(O)=O)[C@H](OP(O)(=O)OP(O)(O)=O)[C@@H](OP(O)(O)=O)[C@@H]1OP(O)(O)=O
C11174	1-Diphosinositol pentakisphosphate	HMDB0012494	NA	C11174	OP(O)(=O)O[C@H]1[C@H](OP(O)(O)=O)[C@H](OP(O)(O)=O)[C@H](OP(O)(=O)OP(O)(O)=O)[C@@H](OP(O)(O)=O)[C@@H]1OP(O)(O)=O
C00088	Nitrite	HMDB0002786	946	C00088	N(=O)[O-]
C01563	Carbamic acid	HMDB0003551	277	C01563	C(=O)(N)O
C05404	D-Gal alpha 1->6D-Gal alpha 1->6D-Glucose	HMDB0060468	440660	C05404	OC[C@H]1O[C@H](OC[C@H]2O[C@H](OC[C@H]3OC(O)[C@H](O)[C@@H](O)[C@@H]3O)[C@H](O)[C@@H](O)[C@H]2O)[C@H](O)[C@@H](O)[C@H]1O
C00492	Raffinose	HMDB0003213	10542	C00492	C([C@@H]1[C@@H]([C@@H]([C@H](C(O1)OC[C@@H]2[C@H]([C@@H]([C@H](C(O2)O[C@]3([C@H]([C@@H]([C@H](O3)CO)O)O)CO)O)O)O)O)O)O)O
C00721	Dextrin	HMDB0006857	62698	C00721	C([C@@H]1[C@H]([C@@H]([C@H](C(O1)O[C@@H]2[C@H](OC([C@@H]([C@H]2O)O)O[C@@H]3[C@H](O[C@@H]([C@@H]([C@H]3O)O)O)CO)CO)O)O)O)O
C00082	L-Tyrosine	HMDB0000158	6057	C00082	C1=CC(=CC=C1C[C@@H](C(=O)O)N)O
C00463	Indole	HMDB0000738	798	C00463	C1=CC=C2C(=C1)C=CN2
C00042	Succinic acid	HMDB0000254	1110	C00042	C(CC(=O)O)C(=O)O
C02170	Methylmalonic acid	HMDB0000202	487	C02170	CC(C(=O)O)C(=O)O
C06010	(S)-2-Acetolactate	HMDB0006855	440878	C06010	CC(=O)[C@@](C)(C(=O)O)O
C16541	Chlorophyllide b	MA3TEM075	51090870	C16541	CCOCCCC(=O)NC1=CC=CC=C1C2=NNC(=N2)C(C)C
C05946	D-4-Hydroxy-2-oxoglutarate	HMDB0060466	440853	C05946	[H][C@@](O)(CC(=O)C(O)=O)C(O)=O
C01180	2-Oxo-4-methylthiobutanoic acid	HMDB0001553	473	C01180	CSCCC(=O)C(=O)O
C00357	N-Acetyl-D-Glucosamine 6-Phosphate	HMDB0001062	440996	C00357	CC(=O)N[C@@H]1[C@H]([C@@H]([C@H](OC1O)COP(=O)(O)O)O)O
C04501	N-Acetyl-glucosamine 1-phosphate	HMDB0001367	7115	C04501	CC(=O)N[C@@H]1[C@@H](O)[C@H](O)[C@@H](CO)OC1OP(O)(O)=O
C03506	Indoleglycerol phosphate	METPA0401	NA	C03506	NA
C02029	Dihydrozeatin	HMDB0012215	439631	C02029	C[C@@H](CCNC1=NC=NC2=C1NC=N2)CO
C05143	Dhurrin	HMDB0060471	161355	C05143	OC[C@H]1O[C@@H](O[C@H](C#N)C2=CC=C(O)C=C2)[C@H](O)[C@@H](O)[C@@H]1O
C00831	Pantetheine	HMDB0003426	479	C00831	CC(C)(CO)C(C(=O)NCCC(=O)NCCS)O
C08604	Cyanidin 3-glucoside	HMDB0030684	4481259	C08604	C1=CC(=C(C=C1C2=C(C=C3C(=CC(=CC3=[O+]2)O)O)OC4C(C(C(C(O4)CO)O)O)O)O)O
C16430	trans-Zeatin riboside monophosphate	METPA1690	NA	C16430	NA
C00671	3-Methyl-2-oxovaleric acid	HMDB0000491	47	C00671	CCC(C)C(=O)C(=O)O
C03758	Dopamine	HMDB0000073	681	C03758	C1=CC(=C(C=C1CCN)O)O
C00170	5'-Methylthioadenosine	HMDB0001173	439176	C00170	CSC[C@@H]1[C@H]([C@H]([C@@H](O1)N2C=NC3=C2N=CN=C3N)O)O
C00387	Guanosine	HMDB0000133	6802	C00387	C1=NC2=C(N1[C@H]3[C@@H]([C@@H]([C@H](O3)CO)O)O)NC(=NC2=O)N
C04332	6,7-Dimethyl-8-(1-D-ribityl)lumazine	HMDB0003826	672	C04332	CC1=C(N(C2=NC(=O)NC(=O)C2=N1)CC(C(C(CO)O)O)O)C
C05634	5-Hydroxyindoleacetaldehyde	HMDB0004073	74688	C05634	C1=CC2=C(C=C1O)C(=CN2)CC=O
C00954	Indoleacetic acid	HMDB0000197	802	C00954	C1=CC=C2C(=C1)C(=CN2)CC(=O)O
C00141	Alpha-ketoisovaleric acid	HMDB0000019	49	C00141	CC(C)C(=O)C(=O)O
C00233	Ketoleucine	HMDB0000695	70	C00233	CC(C)CC(=O)C(=O)O
C00311	Isocitric acid	HMDB0000193	1198	C00311	C(C(C(C(=O)O)O)C(=O)O)C(=O)O
C00417	cis-Aconitic acid	HMDB0000072	643757	C00417	C(/C(=C/C(=O)O)/C(=O)O)C(=O)O
C00158	Citric acid	HMDB0000094	311	C00158	C(C(=O)O)C(CC(=O)O)(C(=O)O)O
C05422	Dehydroascorbic acid	HMDB0001264	7786	C05422	C([C@H]([C@@H]1C(=O)C(=O)C(=O)O1)O)O
C00307	Citicoline	HMDB0001413	13804	C00307	C[N+](C)(C)CCOP(=O)([O-])OP(=O)(O)OC[C@@H]1[C@H]([C@H]([C@@H](O1)N2C=CC(=NC2=O)N)O)O
C01165	L-Glutamic gamma-semialdehyde	HMDB0002104	193305	C01165	C(C[C@@H](C(=O)O)N)C=O
C01157	4-Hydroxyproline	HMDB0000725	5810	C01157	C1[C@H](CN[C@@H]1C(=O)O)O
C00430	5-Aminolevulinic acid	HMDB0001149	137	C00430	C(CC(=O)O)C(=O)CN
C03741	(S)-4-Amino-5-oxopentanoate	METPA0432	NA	C03741	NA
C00051	Glutathione	HMDB0062697	745	C00051	NC(CCC(O)=NC(CS)C(O)=NCC(O)=O)C(O)=O
C00119	Phosphoribosyl pyrophosphate	HMDB0000280	7339	C00119	C([C@@H]1[C@H]([C@H]([C@H](O1)OP(=O)(O)OP(=O)(O)O)O)O)OP(=O)(O)O
C04666	D-Erythro-imidazole-glycerol-phosphate	HMDB0012208	440431	C04666	C1=C(NC=N1)[C@@H]([C@@H](COP(=O)(O)O)O)O
C00294	Inosine	HMDB0000195	6021	C00294	C1=NC(=O)C2=C(N1)N(C=N2)[C@H]3[C@@H]([C@@H]([C@H](O3)CO)O)O
C00482	Sinapic acid	HMDB0032616	637775	C00482	COC1=CC(=CC(=C1O)OC)/C=C/C(=O)O
C00221	D-Glucose	HMDB0000122	5793	C00221	C([C@@H]1[C@H]([C@@H]([C@H](C(O1)O)O)O)O)O
C00267	Alpha-D-Glucose	HMDB0003345	79025	C00267	C([C@@H]1[C@H]([C@@H]([C@H]([C@H](O1)O)O)O)O)O
C00159	D-Mannose	HMDB0000169	18950	C00159	C([C@@H]1[C@H]([C@@H]([C@@H](C(O1)O)O)O)O)O
C00095	D-Fructose	NA	3395	C00095	NA
C00124	D-Galactose	NA	3424	C00124	NA
C00031	D-Glucose	HMDB0000122	5793	C00031	C([C@@H]1[C@H]([C@@H]([C@H](C(O1)O)O)O)O)O
C00137	myo-Inositol	HMDB0000211	NA	C00137	O[C@H]1[C@H](O)[C@@H](O)[C@H](O)[C@H](O)[C@@H]1O
C00984	D-Galactose	HMDB0000143	439357	C00984	C([C@@H]1[C@@H]([C@@H]([C@H]([C@H](O1)O)O)O)O)O
C01825	L-Galactose	HMDB0033704	6036	C01825	C([C@H]1[C@H]([C@H]([C@@H](C(O1)O)O)O)O)O
C02336	D-Fructose	HMDB0000660	439709	C02336	C([C@@H]1[C@H]([C@@H]([C@](O1)(CO)O)O)O)O
C08334	Lotaustralin	HMDB0033865	4626626	C08334	CCC(C)(C#N)OC1C(C(C(C(O1)CO)O)O)O
C00345	6-Phosphogluconic acid	HMDB0001316	91493	C00345	C([C@H]([C@H]([C@@H]([C@H](C(=O)O)O)O)O)O)OP(=O)(O)O
C04536	Magnesium protoporphyrin monomethyl ester	METPA0508	NA	C04536	NA
C02642	Ureidopropionic acid	HMDB0000026	111	C02642	C(CNC(=O)N)C(=O)O
C00152	L-Asparagine	HMDB0000168	6267	C00152	C([C@@H](C(=O)O)N)C(=O)N
C16310	(Z)-3-Hexenal	HMDB0031498	643941	C16310	CC/C=C\CC=O
C00188	L-Threonine	HMDB0000167	6288	C00188	C[C@H]([C@@H](C(=O)O)N)O
C00263	L-Homoserine	HMDB0000719	12647	C00263	C(CO)[C@@H](C(=O)O)N
C05519	L-Allothreonine	HMDB0004041	99289	C05519	C[C@@H]([C@@H](C(=O)O)N)O
C12137	Pelargonidin 3-O-glucoside	METPA1087	NA	C12137	NA
C00322	Oxoadipic acid	HMDB0000225	71	C00322	C(CC(=O)C(=O)O)CC(=O)O
C01762	Xanthosine	HMDB0000299	64959	C01762	C1=NC2=C(N1[C@H]3[C@@H]([C@@H]([C@H](O3)CO)O)O)NC(=O)NC2=O
C01267	Imidazole acetol-phosphate	HMDB0012236	792	C01267	C1=C(NC=N1)CC(=O)COP(=O)(O)O
C02504	2-Isopropylmalic acid	HMDB0000402	5280523	C02504	CC(C)[C@@](CC(=O)O)(C(=O)O)O
C04411	3-Isopropylmalate	HMDB0012156	5462261	C04411	CC(C)[C@@H]([C@H](C(=O)O)O)C(=O)O
C11512	Methyl jasmonate	HMDB0036583	5367719	C11512	CC\C=C/C[C@@H]1[C@@H](CC(=O)OC)CCC1=O
C00262	Hypoxanthine	HMDB0000157	790	C00262	C1=NC2=C(N1)C(=O)N=CN2
C04672	(9Z,15Z)-(13S)-12,13-Epoxyoctadeca-9,11,15-trienoic acid	METPA0529	NA	C04672	NA
C09751	(2R,3R)-3,4',7-Trihydroxyflavanone	HMDB0037254	3512634	C09751	OC1C(OC2=CC(O)=CC=C2C1=O)C1=CC=C(O)C=C1
C00509	Naringenin	HMDB0002670	439246	C00509	C1[C@H](OC2=CC(=CC(=C2C1=O)O)O)C3=CC=C(C=C3)O
C09614	Butin	METPA1718	NA	C09614	NA
C06561	Chalconaringenin	HMDB0029631	5280960	C06561	C1=CC(=CC=C1/C=C/C(=O)C2=C(C=C(C=C2O)O)O)O
C08578	Butein	METPA1722	NA	C08578	NA
C09833	Sakuranetin	HMDB0030090	73571	C09833	COC1=CC(=C2C(=O)C[C@H](OC2=C1)C3=CC=C(C=C3)O)O
C05399	Melibiitol	HMDB0006791	440655	C05399	C([C@@H]1[C@@H]([C@@H]([C@H]([C@H](O1)O)O)O)O)OC[C@@H]([C@H]([C@@H]([C@@H](CO)O)O)O)O
C12205	5-Hydroxyconiferyl alcohol	HMDB0060398	5282095	C12205	COC1=CC(\C=C\CO)=CC(O)=C1O
C02666	Coniferyl aldehyde	METPA0314	NA	C02666	NA
C05625	Rutin	HMDB0003249	5280805	C05625	C[C@H]1[C@@H]([C@H]([C@H]([C@@H](O1)OC[C@@H]2[C@H]([C@@H]([C@H]([C@@H](O2)OC3=C(OC4=CC(=CC(=C4C3=O)O)O)C5=CC(=C(C=C5)O)O)O)O)O)O)O)O
C19796	Quercetin 3-O-rhamnoside 7-O-glucoside	NA	135626263	C19796	NA
C21833	Kaempferol-3-O-rutinoside	NA		C21833	NA
C21854	Kaempferol 3-O-rhamnoside-7-O-glucoside	NA	NA	C21854	NA
C05512	Deoxyinosine	HMDB0000071	65058	C05512	C1[C@@H]([C@H](O[C@H]1N2C=NC3=C2NC=NC3=O)CO)O
C01250	N-Acetyl-L-glutamate 5-semialdehyde	HMDB0006488	192878	C01250	CC(=O)N[C@@H](CCC=O)C(=O)O
C11860	Gibberellin A15 open lactone	METPA1648	NA	C11860	NA
C06094	Gibberellin A53	HMDB0036895	5253706	C06094	CC12CCCC(C)(C1C(C(O)=O)C13CC(=C)C(O)(C1)CCC23)C(O)=O
C03373	5-Aminoimidazole ribonucleotide	HMDB0001235	161500	C03373	C1=C(N(C=N1)[C@H]2[C@@H]([C@@H]([C@H](O2)COP(=O)(O)O)O)O)N
C00253	Nicotinic acid	HMDB0001488	938	C00253	C1=CC(=CN=C1)C(=O)O
C03579	2beta-Hydroxygibberellin 1	METPA1641	NA	C03579	NA
C16540	7(1)-Hydroxychlorophyllide a	NA	51090869	C16540	NA
C18156	Bacteriochlorophyllide b	MA3TEM077	96024373	C18156	CC1=C(C2=C(CCN[C@H]2C3=CNC(=O)C(=C3)Cl)C=C1)C
C06196	dIMP	HMDB0006555	91531	C06196	C1[C@@H]([C@H](O[C@H]1N2C=NC3=C2NC=NC3=O)COP(=O)(O)O)O
C00680	meso-2,6-Diaminoheptanedioate	HMDB0001370	99290	C00680	N[C@@H](CCC[C@H](N)C(O)=O)C(O)=O
C15606	1,2-Dihydroxy-3-keto-5-methylthiopentene	HMDB0012134	5462190	C15606	CSCCC(=O)/C(=C/O)/O
C06032	D-erythro-3-Methylmalate	METPA0739	NA	C06032	NA
C02630	2-Hydroxyglutarate	HMDB0059655	43	C02630	OC(CCC(O)=O)C(O)=O
C00049	L-Aspartic acid	HMDB0000191	5960	C00049	C([C@@H](C(=O)O)N)C(=O)O
C02035	Gibberellin A20	METPA0241	NA	C02035	NA
C11864	Gibberellin A4	METPA1645	NA	C11864	NA
C11865	Gibberellin A51	HMDB0035041	13964928	C11865	CC12CC(O)CC3(OC1=O)C1CCC4CC1(CC4=C)C(C23)C(O)=O
C01041	Ascorbic acid	HMDB0000044	54670067	C01041	C([C@@H]([C@@H]1C(=C(C(=O)O1)O)O)O)O
C02670	D-Glucurono-6,3-lactone	HMDB0006355	439782	C02670	[C@H]1([C@@H]2[C@@H]([C@H](C(=O)O2)O)O[C@H]1O)O
C03289	L-xylo-Hexulonolactone	METPA0381	NA	C03289	NA
C01801	Deoxyribose	HMDB0003224	22833604	C01801	C1[C@H]([C@@H](O[C@@H]1O)CO)O
C04272	(R)-2,3-Dihydroxy-isovalerate	HMDB0012141	440279	C04272	CC(C)([C@H](C(=O)O)O)O
C00021	S-Adenosylhomocysteine	HMDB0000939	439155	C00021	C1=NC2=C(C(=N1)N)N=CN2[C@H]3[C@@H]([C@@H]([C@H](O3)CSCC[C@@H](C(=O)O)N)O)O
C18021	Pheophorbide a	METPA1634	NA	C18021	NA
C16688	Sucrose-6-phosphate	METPA1419	NA	C16688	NA
C02591	Sucrose 6-phosphate	METPA0307	NA	C02591	NA
C00689	Trehalose 6-phosphate	HMDB0001124	122336	C00689	C([C@@H]1[C@H]([C@@H]([C@H]([C@H](O1)O[C@@H]2[C@@H]([C@H]([C@@H]([C@H](O2)COP(=O)(O)O)O)O)O)O)O)O)O
C00168	Hydroxypyruvic acid	HMDB0001352	964	C00168	C(C(=O)C(=O)O)O
C05909	Leucodelphinidin	METPA1713	NA	C05909	NA
C00506	Cysteic acid	HMDB0002757	25701	C00506	C(C(C(=O)O)N)S(=O)(=O)O
C16361	1,3,7-Trimethyluric acid	HMDB0002123	79437	C16361	CN1C2=C(NC1=O)N(C(=O)N(C2=O)C)C
C00760	Galabiose	HMDB0029902	53477911	C00760	OCC1OC(OC2C(O)C(O)C(O)OC2CO)C(O)C(O)C1O
C00352	Glucosamine 6-phosphate	HMDB0001254	439217	C00352	C([C@@H]1[C@H]([C@@H]([C@H]([C@H](O1)O)N)O)O)OP(=O)(O)O
C00621	Dolichyl diphosphate	HMDB0001513	5462166	C00621	CC/C(=C/CCCC(C)CCOP(=O)(O)OP(=O)(O)O)/C
C20121	trans,trans-Farnesyl phosphate	NA	135626581	C20121	NA
C10434	Dattelic acid	HMDB0033999	6124136	C10434	C1C(C(C(C=C1C(=O)O)O)O)OC(=O)/C=C/C2=CC(=C(C=C2)O)O
C00251	Chorismate	HMDB0012199	12039	C00251	C=C(C(=O)O)O[C@@H]1C=C(C=C[C@H]1O)C(=O)O
C00254	Prephenate	HMDB0012283	1028	C00254	C1=CC(C=CC1O)(CC(=O)C(=O)O)C(=O)O
C17210	2-(2'-Methylthio)ethylmalic acid	METPA1766	NA	C17210	NA
C17212	3-(2'-Methylthio)ethylmalic acid	NA	96023620	C17212	NA
C06114	gamma-Glutamyl-beta-aminopropiononitrile	HMDB0060477	440920	C06114	[H][C@](N)(CCC(O)=NCCC#N)C(O)=O
C01079	Protoporphyrinogen IX	HMDB0001097	121893	C01079	CC1=C2CC3=C(C(=C(N3)CC4=C(C(=C(N4)CC5=C(C(=C(N5)CC(=C1CCC(=O)O)N2)CCC(=O)O)C)C=C)C)C=C)C
C05379	Oxalosuccinic acid	HMDB0003974	972	C05379	C(C(C(=O)C(=O)O)C(=O)O)C(=O)O
C00903	Cinnamaldehyde	HMDB0003441	637511	C00903	C1=CC=C(C=C1)/C=C/C=O
C09762	(2S)-Liquiritigenin	HMDB0029519	1889	C09762	C1C(OC2=C(C1=O)C=CC(=C2)O)C3=CC=C(C=C3)O
C09827	(S)-Pinocembrin	HMDB0030808	238782	C09827	C1C(OC2=CC(=CC(=C2C1=O)O)O)C3=CC=CC=C3
C16404	Pinocembrin chalcone	METPA1721	NA	C16404	NA
C08650	Isoliquiritigenin	HMDB0037316	638278	C08650	OC1=CC=C(\C=C\C(=O)C2=C(O)C=C(O)C=C2)C=C1
C12128	(-)-Epiafzelechin	HMDB0030822	443639	C12128	C1[C@H]([C@H](OC2=CC(=CC(=C21)O)O)C3=CC=C(C=C3)O)O
C09320	Afzelechin	HMDB0030823	282014	C09320	C1C(C(OC2=CC(=CC(=C21)O)O)C3=CC=C(C=C3)O)O
C00774	Phloretin	HMDB0003306	4788	C00774	C1=CC(=CC=C1CCC(=O)C2=C(C=C(C=C2O)O)O)O
C05859	Dehydrodolichol diphosphate	NA	8152	C05859	NA
C03242	8,11,14-Eicosatrienoic acid	HMDB0002925	5280581	C03242	CCCCC/C=C\C/C=C\C/C=C\CCCCCCC(=O)O
C02505	2-Phenylacetamide	HMDB0010715	7680	C02505	C1=CC=C(C=C1)CC(=O)N
C00590	Coniferyl alcohol	HMDB0012915	1549095	C00590	COC1=C(C=CC(=C1)/C=C/CO)O
C02514	3-Fumarylpyruvate	HMDB0060371	5280525	C02514	OC(=O)\C=C\C(=O)CC(=O)C(O)=O
C16359	1-Methyluric acid	HMDB0003099	69726	C16359	CN1C(=O)C2=C(NC(=O)N2)NC1=O
C16355	7-Methyluric acid	HMDB0011107	69160	C16355	CN1C2=C(NC(=O)NC2=O)NC1=O
C00669	gamma-Glutamylcysteine	HMDB0001049	123938	C00669	C(CC(=O)N[C@@H](CS)C(=O)O)[C@@H](C(=O)O)N
C03582	Resveratrol	HMDB0003747	445154	C03582	C1=CC(=CC=C1/C=C/C2=CC(=CC(=C2)O)O)O
C03263	Coproporphyrinogen III	HMDB0001261	321	C03263	CC1=C2CC3=C(C(=C(N3)CC4=C(C(=C(N4)CC5=C(C(=C(N5)CC(=C1CCC(=O)O)N2)C)CCC(=O)O)C)CCC(=O)O)CCC(=O)O)C
C05768	Coproporphyrinogen I	HMDB0002158	68271	C05768	CC1=C2CC3=C(C(=C(N3)CC4=C(C(=C(N4)CC5=C(C(=C(N5)CC(=C1CCC(=O)O)N2)C)CCC(=O)O)C)CCC(=O)O)C)CCC(=O)O
C00577	D-Glyceraldehyde	NA	3856	C00577	NA
C03547	Glycolic acid	HMDB0000115	757	C03547	C(C(=O)O)O
C01013	Hydroxypropionic acid	HMDB0000700	68152	C01013	C(CO)C(=O)O
C00184	Dihydroxyacetone	HMDB0001882	670	C00184	C(C(=O)CO)O
C00256	D-Lactic acid	HMDB0001311	61503	C00256	C[C@H](C(=O)O)O
C05274	Decanoyl-CoA (n-C10:0CoA)	HMDB0006404	440615	C05274	CCCCCCCCCC(=O)SCCNC(=O)CCNC(=O)C(C(C)(C)COP(=O)(O)OP(=O)(O)OC[C@@H]1[C@H]([C@H]([C@@H](O1)N2C=NC3=C2N=CN=C3N)O)OP(=O)(O)O)O
C21028	(R)-5,6-Dihydrothymine	NA	254816253	C21028	NA
C05715	gamma-Amino-gamma-cyanobutanoate	METPA0649	NA	C05715	NA
C07480	Theobromine	HMDB0002825	5429	C07480	CN1C=NC2=C1C(=O)NC(=O)N2C
C13747	Paraxanthine	HMDB0001860	4687	C13747	CN1C=NC2=C1C(=O)N(C(=O)N2)C
C01530	Stearic acid	HMDB0000827	5281	C01530	CCCCCCCCCCCCCCCCCC(=O)O
C17214	2-(3'-Methylthio)propylmalic acid	METPA1767	NA	C17214	NA
C17215	3-(3'-Methylthio)propylmalic acid	NA	96023623	C17215	NA
C00921	7,8-Dihydropteroic acid	HMDB0001412	170	C00921	C1C(=NC2=C(N1)NC(=NC2=O)N)CNC3=CC=C(C=C3)C(=O)O
C00255	Riboflavin	HMDB0000244	493570	C00255	CC1=CC2=C(C=C1C)N(C3=NC(=O)NC(=O)C3=N2)C[C@@H]([C@@H]([C@@H](CO)O)O)O
C00499	Allantoic acid	HMDB0001209	203	C00499	C(C(=O)O)(NC(=O)N)NC(=O)N
C00423	trans-Cinnamate	NA	3713	C00423	NA
C00450	(S)-2,3,4,5-Tetrahydropiperidine-2-carboxylate	HMDB0012130	165067	C00450	C1CC=NC(C1)C(=O)O
C11039	2'-Deoxy-5-hydroxymethylcytidine-5'-triphosphate	METPA0985	NA	C11039	NA
C01613	Stachyose	HMDB0003553	439531	C01613	C([C@@H]1[C@@H]([C@@H]([C@H]([C@H](O1)OC[C@@H]2[C@@H]([C@@H]([C@H]([C@H](O2)OC[C@@H]3[C@H]([C@@H]([C@H]([C@H](O3)O[C@]4([C@H]([C@@H]([C@H](O4)CO)O)O)CO)O)O)O)O)O)O)O)O)O)O
C18155	bacteriochlorophyllide a	MA3TEM076	96024372	C18155	CC1=C(C=C2[C@H](NCCC2=C1)/C=C/C3=CC=NC=C3)C
C00061	Flavin Mononucleotide	HMDB0001520	643976	C00061	CC1=CC2=C(C=C1C)N(C3=NC(=O)NC(=O)C3=N2)C[C@@H]([C@@H]([C@@H](COP(=O)(O)O)O)O)O
C00127	Oxidized glutathione	HMDB0003337	975	C00127	C(CC(=O)NC(CSSCC(C(=O)NCC(=O)O)NC(=O)CCC(C(=O)O)N)C(=O)NCC(=O)O)C(C(=O)O)N
C05904	Pelargonidin	HMDB0003263	67249	C05904	C1=CC(=CC=C1C2=C(C=C3C(=CC(=CC3=[O+]2)O)O)O)O.[Cl-]
C01477	Apigenin	HMDB0002124	5280443	C01477	C1=CC(=CC=C1C2=CC(=O)C3=C(C=C(C=C3O2)O)O)O
C10044	Norizalpinin	HMDB0029521	5281616	C10044	C1=CC=C(C=C1)C2=C(C(=O)C3=C(C=C(C=C3O2)O)O)O
C17758	4,5-seco-Dopa	NA	96024085	C17758	NA
C10646	Lariciresinol	NA	12829	C10646	NA
C20454	(-)-Lariciresinol	NA	163312191	C20454	NA
C17222	2-(5'-Methylthio)pentylmalic acid	METPA1769	NA	C17222	NA
C17223	3-(5'-Methylthio)pentylmalic acid	NA	96023631	C17223	NA
C00603	(S)-Ureidoglycolic acid	HMDB0001005	439269	C00603	[C@H](C(=O)O)(NC(=O)N)O
C20345	Isopentenyl phosphate	NA	163312083	C20345	NA
C03175	Shikimate 3-phosphate	METPA0369	NA	C03175	NA
C00627	Pyridoxine 5'-phosphate	HMDB0001319	1055	C00627	CC1=NC=C(C(=C1O)CO)COP(=O)(O)O
C00212	Adenosine	HMDB0000050	60961	C00212	C1=NC2=C(C(=N1)N)N=CN2[C@H]3[C@@H]([C@@H]([C@H](O3)CO)O)O
C00330	Deoxyguanosine	HMDB0000085	187790	C00330	C1[C@@H]([C@H](O[C@H]1N2C=NC3=C2NC(=NC3=O)N)CO)O
C04874	7,8-Dihydroneopterin	HMDB0002275	659	C04874	C1C(=NC2=C(N1)NC(=NC2=O)N)C(C(CO)O)O
C00019	S-Adenosylmethionine	HMDB0001185	16757548	C00019	C[S+](CC[C@H](C(=O)O)N)C[C@@H]1[C@H]([C@H]([C@@H](O1)N2C=NC3=C2N=CN=C3N)O)O
C00167	Uridine diphosphate glucuronic acid	HMDB0000935	17473	C00167	C1=CN(C(=O)NC1=O)[C@H]2[C@@H]([C@@H]([C@H](O2)COP(=O)(O)OP(=O)(O)O[C@@H]3[C@@H]([C@H]([C@@H]([C@H](O3)C(=O)O)O)O)O)O)O
C00617	UDP-D-galacturonate	HMDB0012302	15592253	C00617	C1=CN(C(=O)NC1=O)[C@H]2[C@@H]([C@@H]([C@H](O2)COP(=O)(O)OP(=O)(O)O[C@@H]3[C@@H]([C@H]([C@H]([C@H](O3)C(=O)O)O)O)O)O)O
C06054	2-Oxo-3-hydroxy-4-phosphobutanoic acid	HMDB0006801	21145142	C06054	C([C@H](C(=O)C(=O)O)O)OP(=O)(O)O
C00559	Deoxyadenosine	HMDB0000101	13730	C00559	C1[C@@H]([C@H](O[C@H]1N2C=NC3=C2N=CN=C3N)CO)O
C03648	cis-3 and trans-2-Hexenyl propionate	HMDB0032322	440073	C03648	C1=CC(=CC=C1[C@@H]2[C@H]([C@H](C3=C(C=C(C=C3O2)O)O)O)O)O
C09727	Epicatechin	HMDB0001871	72276	C09727	C1[C@H]([C@H](OC2=CC(=CC(=C21)O)O)C3=CC(=C(C=C3)O)O)O
C06562	Catechin	HMDB0002780	9064	C06562	C1[C@@H]([C@H](OC2=CC(=CC(=C21)O)O)C3=CC(=C(C=C3)O)O)O
C17218	2-(4'-Methylthio)butylmalic acid	METPA1768	NA	C17218	NA
C17219	3-(4'-Methylthio)butylmalic acid	NA	96023627	C17219	NA
C14463	(R)-3-Hydroxy-3-methyl-2-oxopentanoate	METPA1124	NA	C14463	NA
C00966	2-Dehydropantoate	METPA0104	NA	C00966	NA
C13455	Abscisic aldehyde	METPA1110	NA	C13455	NA
C09826	Pinobanksin	METPA1712	NA	C09826	NA
C11508	Delta 8,14 -Sterol	HMDB0006928	443237	C11508	C[C@H]1[C@@H]2CCC3=C([C@]2(CC[C@@H]1O)C)CC[C@]4(C3=CC[C@@H]4[C@H](C)CCC(=C)C(C)C)C
C15783	5-Dehydroavenasterol	HMDB0006852	23724575	C15783	C/C=C(/CC[C@@H](C)C1CCC2[C@@]1(CCC3C2=CC=C4[C@@]3(CC[C@@H](C4)O)C)C)\C(C)C
C11455	4,4-Dimethylcholesta-8,14,24-trienol	HMDB0001023	443212	C11455	C[C@H](CCC=C(C)C)[C@H]1CC=C2[C@@]1(CCC3=C2CC[C@@H]4[C@@]3(CC[C@@H](C4(C)C)O)C)C
C22123	Avenastenone	NA	NA	C22123	NA
C00944	3-Dehydroquinate	HMDB0012710	439351	C00944	C1[C@H]([C@@H](C(=O)C[C@]1(C(=O)O)O)O)O
C02938	3-Indoleacetonitrile	HMDB0006524	351795	C02938	C1=CC=C2C(=C1)C(=CN2)CC#N
C01040	L-Gulonolactone	HMDB0003466	439373	C01040	C([C@@H]([C@@H]1[C@@H]([C@@H](C(=O)O1)O)O)O)O
C01115	L-Galactono-1,4-lactone	METPA0133	NA	C01115	NA
C08276	3-Methylthiopropionic acid	HMDB0001527	563	C08276	CSCCC(=O)O
C19872	N-Formyl-4-amino-5-aminomethyl-2-methylpyrimidine	NA	135626338	C19872	NA
C05839	cis-beta-D-Glucosyl-2-hydroxycinnamate	HMDB0060077	5316113	C05839	OC[C@H]1O[C@@H](OC2=CC=CC=C2\C=C/C(O)=O)[C@H](O)[C@@H](O)[C@@H]1O
C05823	3-Mercaptolactic acid	HMDB0002127	160645	C05823	C(C(C(=O)O)O)S
C11521	UDP-6-sulfoquinovose	METPA1034	NA	C11521	NA
C16323	(3Z,6Z)-3,6-Nonadienal	HMDB0031152	5352808	C16323	CC/C=C\C/C=C\CC=O
C00440	5-Methyltetrahydrofolic acid	HMDB0001396	439234	C00440	CN1C(CNC2=C1C(=O)N=C(N2)N)CNC3=CC=C(C=C3)C(=O)N[C@H](CCC(=O)O)C(=O)O
C00029	Uridine diphosphate glucose	HMDB0000286	53477679	C00029	C1=CN(C(=O)NC1=O)[C@@H]2[C@H]([C@H]([C@@H](O2)COP(=O)(O)OP(=O)(O)OC3[C@H]([C@@H]([C@H]([C@@H](O3)CO)O)O)O)O)O
C00052	Uridine diphosphategalactose	HMDB0000302	18068	C00052	C1=CN(C(=O)NC1=O)[C@H]2[C@@H]([C@@H]([C@H](O2)COP(=O)(O)OP(=O)(O)O[C@@H]3[C@@H]([C@H]([C@H]([C@H](O3)CO)O)O)O)O)O
G00146	(GlcN)1 (Ino(acyl)-P)1 (Man)1	METPA1584	NA	G00146	NA
C00055	Cytidine monophosphate	HMDB0000095	8117	C00055	C1=CN(C(=O)N=C1N)[C@H]2[C@@H]([C@@H]([C@H](O2)COP(=O)(O)O)O)O
C01226	12-OPDA	METPA0152	NA	C01226	NA
C16324	9,10-EOT	METPA1281	NA	C16324	NA
C01134	Pantetheine 4'-phosphate	HMDB0001416	987	C01134	CC(C)(COP(=O)(O)O)C(C(=O)NCCC(=O)NCCS)O
C04556	4-Amino-2-methyl-5-phosphomethylpyrimidine	METPA0511	NA	C04556	NA
C04713	N6-(delta2-Isopentenyl)-adenosine 5'-monophosphate	METPA1686	NA	C04713	NA
C02291	L-Cystathionine	HMDB0000099	439258	C02291	C(CSC[C@@H](C(=O)O)N)[C@@H](C(=O)O)N
C00624	N-Acetylglutamic acid	HMDB0001138	185	C00624	CC(=O)NC(CCC(=O)O)C(=O)O
C00461	Chitin	HMDB0003362	21252321	C00461	CC(=O)NC1[C@@H](OC([C@H]([C@@H]1O)COC[C@H]2C([C@H]([C@@H](C(O2)CO)O)O)NC(=O)C)CO)COC[C@H]3[C@@H](C([C@@H](OC3CO)O)NC(=O)C)O
C04734	Phosphoribosyl formamidocarboxamide	HMDB0001439	166760	C04734	C1=NC(=C(N1[C@H]2[C@@H]([C@@H]([C@H](O2)COP(=O)(O)O)O)O)NC=O)C(=O)N
C16358	1-Methylxanthine	HMDB0010738	80220	C16358	CN1C(=O)C2=C(NC1=O)N=CN2
C16353	7-Methylxanthine	HMDB0001991	68374	C16353	CN1C=NC2=C1C(=O)NC(=O)N2
C00475	Cytidine	HMDB0000089	6253	C00475	C1=CN(C(=O)N=C1N)[C@H]2[C@@H]([C@@H]([C@H](O2)CO)O)O
C05711	gamma-Glutamyl-beta-cyanoalanine	HMDB0060478	53297342	C05711	N[C@@H](CCC(O)=N[C@@H](CC#N)C(O)=O)C(O)=O
C00147	Adenine	HMDB0000034	190	C00147	C1=NC2=C(N1)C(=NC=N2)N
C00329	Glucosamine	HMDB0001514	439213	C00329	C([C@@H]1[C@H]([C@@H]([C@H](C(O1)O)N)O)O)O
C06056	4-Hydroxy-L-threonine	METPA0747	NA	C06056	NA
C06082	(S)-Abscisic acid	HMDB0035140	5702609	C06082	CC1=CC(=O)CC([C@]1(/C=C/C(=C/C(=O)O)/C)O)(C)C
C00131	Deoxyadenosine triphosphate	HMDB0001532	15993	C00131	C1[C@@H]([C@H](O[C@H]1N2C=NC3=C2N=CN=C3N)COP(=O)(O)OP(=O)(O)OP(=O)(O)O)O
C03089	5-Methylthioribose	HMDB0001087	439904	C03089	CSC[C@@H]1[C@H]([C@H]([C@@H](O1)O)O)O
C00935	UDP-L-arabinose	HMDB0012303	644105	C00935	C1[C@@H]([C@@H]([C@H]([C@H](O1)OP(=O)(O)OP(=O)(O)OC[C@@H]2[C@H]([C@H]([C@@H](O2)N3C=CC(=O)NC3=O)O)O)O)O)O
C00190	Cotinine glucuronide	HMDB0001013	3398121	C00190	CN1C(CCC1=O)C2=C[N+](=CC=C2)C3C(C(C(C(O3)C(=O)[O-])O)O)O
C01623	UDP-D-apiose	HMDB0012301	25202307	C01623	C1[C@@]([C@H]([C@@H](O1)OP(=O)(O)OP(=O)(O)OC[C@@H]2[C@H]([C@H]([C@@H](O2)N3C=CC(=O)NC3=O)O)O)O)(CO)O
C18094	UDP-L-arabinofuranose	NA	96024311	C18094	NA
C00020	Adenosine monophosphate	HMDB0000045	6083	C00020	C1=NC2=C(C(=N1)N)N=CN2[C@H]3[C@@H]([C@@H]([C@H](O3)COP(=O)(O)O)O)O
C00360	Deoxyadenosine monophosphate	HMDB0000905	12599	C00360	C1[C@@H]([C@H](O[C@H]1N2C=NC3=C2N=CN=C3N)COP(=O)(O)O)O
C00362	2'-Deoxyguanosine 5'-monophosphate	HMDB0001044	65059	C00362	C1[C@@H]([C@H](O[C@H]1N2C=NC3=C2NC(=NC3=O)N)COP(=O)(O)O)O
C00364	5-Thymidylic acid	HMDB0001227	9700	C00364	CC1=CN(C(=O)NC1=O)[C@H]2C[C@@H]([C@H](O2)COP(=O)(O)O)O
C00164	Acetoacetic acid	HMDB0000060	96	C00164	CC(=O)CC(=O)O
C00232	Succinic acid semialdehyde	HMDB0001259	1112	C00232	C(CC(=O)O)C=O
C00109	2-Ketobutyric acid	HMDB0000005	58	C00109	CCC(=O)C(=O)O
C06002	(S)-Methylmalonic acid semialdehyde	HMDB0002217	5462303	C06002	C[C@@H](C=O)C(=O)O
C00349	2-Methyl-3-oxopropanoic acid	HMDB0001172	296	C00349	CC(C=O)C(=O)O
C00986	1,3-Diaminopropane	HMDB0000002	428	C00986	C(CN)CN
C00438	Ureidosuccinic acid	HMDB0000828	93072	C00438	C([C@@H](C(=O)O)NC(=O)N)C(=O)O
C04640	Phosphoribosylformylglycineamidine	HMDB0000999	440417	C04640	C([C@@H]1[C@H]([C@H]([C@@H](O1)N=C(CNC=O)N)O)O)OP(=O)(O)O
C00314	Pyridoxine	HMDB0000239	1054	C00314	CC1=NC=C(C(=C1O)CO)CO
C02199	UDP-L-rhamnose	HMDB0012305	192751	C02199	C[C@H]1[C@@H]([C@H]([C@H]([C@H](O1)OP(=O)(O)OP(=O)(O)OC[C@@H]2[C@H]([C@H]([C@@H](O2)N3C=CC(=O)NC3=O)O)O)O)O)O
C02226	Citraconic acid	HMDB0000634	643798	C02226	C/C(=C/C(=O)O)/C(=O)O
C03492	D-4'-Phosphopantothenate	HMDB0001016	131	C03492	CC(C)(COP(=O)(O)O)C(C(=O)NCCC(=O)O)O
C04751	5-amino-1-(5-phospho-D-ribosyl)imidazole-4-carboxylate	HMDB0006273	165388	C04751	C1=NC(=C(N1[C@H]2[C@@H]([C@@H]([C@H](O2)COP(=O)(O)O)O)O)N)C(=O)O
C00295	Orotic acid	HMDB0000226	967	C00295	C1=C(NC(=O)NC1=O)C(=O)O
C01571	Capric acid	HMDB0000511	2969	C01571	CCCCCCCCCC(=O)O
C16311	12-Oxo-9(Z)-dodecenoic acid	METPA1275	NA	C16311	NA
C05610	Sinapoyl aldehyde	METPA0625	NA	C05610	NA
C05608	(E)-3-(4-Hydroxyphenyl)-2-propenal	HMDB0040986	641301	C05608	OC1=CC=C(\C=C\C=O)C=C1
C11863	Gibberellin A9	METPA1064	NA	C11863	NA
C00670	Glycerophosphocholine	HMDB0000086	71920	C00670	C[N+](C)(C)CCOP(=O)([O-])OC[C@H](CO)O
C01300	2-Amino-4-hydroxy-6-hydroxymethyl-7,8-dihydropteridine	METPA0169	NA	C01300	NA
C15650	2,3-Diketo-5-methylthiopentyl-1-phosphate	METPA1194	NA	C15650	NA
C02612	(R)-2-Methylmalate	METPA0308	NA	C02612	NA
C00206	dADP	HMDB0001508	53477733	C00206	C1[C@@H]([C@H](OC1N2C=NC3=C2N=CN=C3N)COP(=O)(O)OP(=O)(O)O)O
C01143	(S)-5-Diphosphomevalonic acid	HMDB0001090	439418	C01143	C[C@@](CCOP(=O)(O)OP(=O)(O)O)(CC(=O)O)O
C01236	6-Phosphonoglucono-D-lactone	HMDB0001127	439452	C01236	C([C@@H]1[C@H]([C@@H]([C@H](C(=O)O1)O)O)O)OP(=O)(O)O
C04691	2-Dehydro-3-deoxy-D-arabino-heptonate 7-phosphate	METPA0533	NA	C04691	NA
C02576	Perillyl aldehyde	HMDB0003647	16441	C02576	CC(=C)C1CCC(=CC1)C=O
C00974	Aromadendrin	HMDB0030847	662	C00974	C1=CC(=CC=C1C2C(C(=O)C3=C(C=C(C=C3O2)O)O)O)O
C05631	Eriodictyol	HMDB0005810	440735	C05631	C1[C@H](OC2=CC(=CC(=C2C1=O)O)O)C3=CC(=C(C=C3)O)O
C01378	Fustin	METPA1727	NA	C01378	NA
C15525	Eriodictyol chalcone	METPA1729	NA	C15525	NA
C00105	Uridine 5'-monophosphate	HMDB0000288	6030	C00105	C1=CN(C(=O)NC1=O)[C@H]2[C@@H]([C@@H]([C@H](O2)COP(=O)(O)O)O)O
C00365	dUMP	HMDB0001409	65063	C00365	C1[C@@H]([C@H](O[C@H]1N2C=CC(=O)NC2=O)COP(=O)(O)O)O
C01168	Pseudouridine 5'-phosphate	HMDB0001271	439424	C01168	C1=C(C(=O)NC(=O)N1)[C@H]2[C@@H]([C@@H]([C@H](O2)COP(=O)(O)O)O)O
C11355	4-Amino-4-deoxychorismate	METPA0993	NA	C11355	NA
C00491	L-Cystine	HMDB0000192	67678	C00491	C([C@@H](C(=O)O)N)SSC[C@@H](C(=O)O)N
C12208	3-O-p-Coumaroylquinic acid	HMDB0029681	9945785	C12208	O[C@@H]1C[C@@](O)(C[C@@H](OC(=O)\C=C\C2=CC=C(O)C=C2)[C@H]1O)C(O)=O
C02947	4-Coumaroylshikimate	METPA1693	NA	C02947	NA
C03722	Quinolinic acid	HMDB0000232	1066	C03722	C1=CC(=C(N=C1)C(=O)O)C(=O)O
C00388	Histamine	HMDB0000870	774	C00388	C1=C(NC=N1)CCN
C03078	4-Guanidinobutanamide	METPA0359	NA	C03078	NA
C00719	Betaine	HMDB0000043	247	C00719	C[N+](C)(C)CC(=O)[O-]
C00183	L-Valine	HMDB0000883	6287	C00183	CC(C)[C@@H](C(=O)O)N
C01005	Phosphoserine	HMDB0000272	68841	C01005	C([C@@H](C(=O)O)N)OP(=O)(O)O
C00118	D-Glyceraldehyde 3-phosphate	HMDB0001112	729	C00118	C(C(C=O)O)OP(=O)(O)O
C00111	Dihydroxyacetone phosphate	HMDB0001473	668	C00111	C(C(=O)COP(=O)(O)O)O
C15556	3,4-Dihydroxy-2-butanone 4-phosphate	METPA1189	NA	C15556	NA
C03765	4-Hydroxyphenylacetaldehyde	HMDB0003767	440113	C03765	C1=CC(=CC=C1CC=O)O
C07086	Phenylacetic acid	HMDB0000209	999	C07086	C1=CC=C(C=C1)CC(=O)O
C04181	3-Hydroxy-3-methyl-2-oxobutanoic acid	METPA0472	NA	C04181	NA
C03406	Argininosuccinic acid	HMDB0000052	16950	C03406	C(C[C@@H](C(=O)O)N)CN=C(N)N[C@@H](CC(=O)O)C(=O)O
C00386	Carnosine	HMDB0000033	439224	C00386	C1=C(NC=N1)C[C@@H](C(=O)O)NC(=O)CCN
C04823	SAICAR	HMDB0000797	160666	C04823	C1=NC(=C(N1[C@H]2[C@@H]([C@@H]([C@H](O2)COP(=O)(O)O)O)O)N)C(=O)N[C@@H](CC(=O)O)C(=O)O
C01678	Cysteamine	HMDB0002991	6058	C01678	C(CS)N
C11434	2-C-Methyl-D-erythritol 4-phosphate	METPA1027	NA	C11434	NA
C01494	trans-Ferulic acid	HMDB0000954	445858	C01494	COC1=C(C=CC(=C1)/C=C/C(=O)O)O
C12204	5-Hydroxyconiferaldehyde	METPA1090	NA	C12204	NA
C00544	Homogentisic acid	HMDB0000130	780	C00544	C1=CC(=C(C=C1O)CC(=O)O)O
C05577	3,4-Dihydroxymandelaldehyde	HMDB0006242	151725	C05577	C1=CC(=C(C=C1C(C=O)O)O)O
C00826	L-Arogenate	METPA0086	NA	C00826	NA
C03742	(S)-4-Hydroxymandelonitrile	HMDB0060318	440104	C03742	O[C@H](C#N)C1=CC=C(O)C=C1
C00666	Diaminopimelic acid	HMDB0001370	99290	C00666	C(C[C@@H](C(=O)O)N)C[C@@H](C(=O)O)N
C05576	3,4-Dihydroxyphenylglycol	HMDB0000318	91528	C05576	C1=CC(=C(C=C1C(CO)O)O)O
C00079	L-Phenylalanine	HMDB0000159	6140	C00079	C1=CC=C(C=C1)C[C@@H](C(=O)O)N
C04350	(E)-4-Hydroxyphenylacetaldehyde oxime	NA	6999	C04350	NA
C04752	2-Methyl-4-amino-5-hydroxymethylpyrimidine diphosphate	METPA0538	NA	C04752	NA
C05841	Nicotinate D-ribonucleoside	HMDB0006809	161234	C05841	C1=CC(=C[N+](=C1)[C@H]2[C@@H]([C@@H]([C@H](O2)CO)O)O)C(=O)O
C00149	L-Malic acid	HMDB0000156	222656	C00149	C([C@@H](C(=O)O)O)C(=O)O
C00209	Oxalic acid	HMDB0002329	971	C00209	C(=O)(C(=O)O)O
C00588	Phosphorylcholine	HMDB0001565	8691	C00588	C[N+](C)(C)CCOP(=O)(O)O
C04294	5-(2-Hydroxyethyl)-4-methylthiazole	HMDB0032985	1136	C04294	CC1=C(SC=N1)CCO
C02693	1H-Indole-3-acetamide	HMDB0029739	397	C02693	C1=CC=C2C(=C1)C(=CN2)CC(=O)N
C18217	16-Feruloyloxypalmitate	NA	103061399	C18217	NA
C11857	Gibberellin A12	METPA1650	NA	C11857	NA
C04089	UDP-4-dehydro-6-deoxy-D-glucose	HMDB0012300	440219	C04089	C[C@@H]1C(=O)[C@@H]([C@H]([C@@H](O1)OP(=O)(O)OP(=O)(O)OC[C@@H]2[C@H]([C@H]([C@@H](O2)N3C=CC(=O)NC3=O)O)O)O)O
C17328	UDP-4-keto-rhamnose	METPA1435	NA	C17328	NA
C03232	Phosphohydroxypyruvic acid	HMDB0001024	105	C03232	C(C(=O)C(=O)O)OP(=O)(O)O
C05903	Kaempferol	HMDB0005801	5280863	C05903	C1=CC(=CC=C1C2=C(C(=O)C3=C(C=C(C=C3O2)O)O)O)O
C01514	Luteolin	HMDB0005800	5280445	C01514	C1=CC(=C(C=C1C2=CC(=O)C3=C(C=C(C=C3O2)O)O)O)O
C16360	3,7-Dimethyluric acid	HMDB0001982	83126	C16360	CN1C2=C(NC1=O)N(C(=O)NC2=O)C
C16356	1,7-Dimethyluric acid	HMDB0011103	91611	C16356	CN1C2=C(NC1=O)NC(=O)N(C2=O)C
C00078	L-Tryptophan	HMDB0000929	6305	C00078	C1=CC=C2C(=C1)C(=CN2)C[C@@H](C(=O)O)N
C00470	Pectic acid	HMDB0003363	445929	C00470	[C@@H]1([C@H]([C@H](O[C@@H]([C@@H]1O)O)C(=O)O)O)O
C00191	D-Glucuronic acid	HMDB0000127	94715	C00191	[C@@H]1([C@@H]([C@H](O[C@@H]([C@@H]1O)O)C(=O)O)O)O
C15976	2-Methyl-1-hydroxypropyl-ThPP	HMDB0006866	23724626	C15976	CC1=C(SC(=[N+]1CC2=CN=C(N=C2N)C)C(C(C)C)O)CCOP(=O)(O)OP(=O)(O)O
C02273	Digalacturonic acid	HMDB0039721	6857565	C02273	OC1OC(C(OC2OC(C(O)C(O)C2O)C(O)=O)C(O)C1O)C(O)=O
C02091	Ureidoglycine	METPA0247	NA	C02091	NA
C00140	N-Acetyl-D-glucosamine	HMDB0000215	439174	C00140	CC(=O)N[C@@H]1[C@H]([C@@H]([C@H](OC1O)CO)O)O
C00366	Uric acid	HMDB0000289	1175	C00366	C12=C(NC(=O)N1)NC(=O)NC2=O
C15546	Cis-zeatin-O-glucoside	HMDB0012203	6250	C15546	C/C(=C\CNC1=NC=NC2=C1NC=N2)/CO[C@@H]3[C@@H]([C@H]([C@@H]([C@H](O3)CO)O)O)O
C02463	Precorrin 2	METPA0294	NA	C02463	NA
C00449	Saccharopine	HMDB0000279	160556	C00449	C(CCN[C@@H](CCC(=O)O)C(=O)O)C[C@@H](C(=O)O)N
C05401	Galactosylglycerol	HMDB0006790	656504	C05401	C([C@@H]1[C@@H]([C@@H]([C@H]([C@@H](O1)OCC(CO)O)O)O)O)O
C16448	Dihydrozeatin-O-glucoside	NA	47205744	C16448	NA
C00341	Geranyl 2-methylbutyrate	HMDB0032291	6437648	C00341	CCC(C)C(=O)OC/C=C(\C)/CCC=C(C)C
C10287	4-[(E)-2-(3,5-dimethoxyphenyl)ethenyl]phenol	HMDB0130987	5281727	C10287	[H]\C(=C(\[H])C1=CC(OC)=CC(OC)=C1)C1=CC=C(O)C=C1
C19616	18-Hydroxyoleate	NA	135626104	C19616	NA
C19418	9,10-Epoxystearic acid	HMDB0061650	15868	C19418	CCCCCCCCC1OC1CCCCCCCC(O)=O
C19874	26-Hydroxybrassinolide	NA	135626340	C19874	NA
C20693	Carlactone	NA	172232413	C20693	NA
C05635	5-Hydroxyindoleacetic acid	HMDB0000763	1826	C05635	C1=CC2=C(C=C1O)C(=CN2)CC(=O)O
C00106	Uracil	HMDB0000300	1174	C00106	C1=CNC(=O)NC1=O
C00043	Uridine diphosphate-N-acetylglucosamine	HMDB0000290	9547196	C00043	CC(=O)N[C@@H]1[C@H]([C@@H]([C@H](O[C@@H]1OP(=O)(O)OP(=O)(O)OC[C@@H]2[C@H]([C@H]([C@@H](O2)N3C=CC(=O)NC3=O)O)O)CO)O)O
G10610	UDP-N-acetyl-D-glucosamine	METPA1612	NA	G10610	NA
C00859	Gibberellin A1	METPA0089	NA	C00859	NA
C06096	Gibberellin A29	METPA1656	NA	C06096	NA
C11868	Gibberellin A34	METPA1644	NA	C11868	NA
C00881	Deoxycytidine	HMDB0000014	13711	C00881	C1[C@@H]([C@H](O[C@H]1N2C=CC(=NC2=O)N)CO)O
C01036	Maleylacetoacetic acid	HMDB0002052	5280398	C01036	C(C(=O)CC(=O)O)C(=O)/C=C\C(=O)O
C05819	Menaquinol	HMDB0060487	5280839	C05819	CC(C)=CCC\C(C)=C\CC1=C(O)C2=CC=CC=C2C(O)=C1C
C00011	Carbon dioxide	HMDB0001967	280	C00011	C(=O)=O
C00242	Guanine	HMDB0000132	764	C00242	C1=NC2=C(N1)C(=O)N=C(N2)N
C00822	Dopaquinone	HMDB0001229	439316	C00822	C1=CC(=O)C(=O)C=C1C[C@@H](C(=O)O)N
C00673	Deoxyribose 5-phosphate	HMDB0001031	45934311	C00673	C1[C@@H]([C@H](O[C@H]1O)COP(=O)(O)O)O
C11437	1-Deoxy-D-xylulose 5-phosphate	HMDB0001213	443201	C11437	CC(=O)[C@H]([C@@H](COP(=O)(O)O)O)O
C00844	Prunasin	HMDB0034934	119033	C00844	C1=CC=C(C=C1)[C@H](C#N)O[C@H]2[C@@H]([C@H]([C@@H]([C@H](O2)CO)O)O)O
C00337	4,5-Dihydroorotic acid	HMDB0000528	648	C00337	C1C(NC(=O)NC1=O)C(=O)O
C05366	(+)-Pinoresinol	NA	7741	C05366	NA
C20455	(-)-Pinoresinol	NA	163312192	C20455	NA
C16426	Isopentenyladenosine-5'-diphosphate	METPA1687	NA	C16426	NA
C00257	Gluconic acid	HMDB0000625	10690	C00257	C([C@H]([C@H]([C@@H]([C@H](C(=O)O)O)O)O)O)O
C00800	Gulonic acid	HMDB0003290	152304	C00800	C([C@H]([C@@H]([C@H]([C@H](C(=O)O)O)O)O)O)O
C11832	Divinyl chlorophyllide a	METPA1062	NA	C11832	NA
C11830	13(1)-Oxo-magnesium-protoporphyrin IX 13-monomethyl ester	METPA1060	NA	C11830	NA
C02880	Protochlorophyllide	HMDB0031148	NA	C02880	[Mg++].[H]\C-1=C2\[N-]\C(=C([H])/C3=N/C(/C(CCC([O-])=O)=C3C)=C3\C(C(=O)OC)C(=O)C4=C(C)\C(\N=C34)=C([H])\C3=C(C=C)C(C)=C-1N3)C(C)=C2C=C
C00169	Carbamoyl phosphate	HMDB0001096	278	C00169	C(=O)(N)OP(=O)(O)O
C00048	Glyoxylic acid	HMDB0000119	760	C00048	C(=O)C(=O)O
C06459	Phosphorylcholine	HMDB0001565	8691	C06459	C[N+](C)(C)CCOP(O)(O)=O
C01262	Anserine	HMDB0000194	112072	C01262	CN1C=NC=C1C[C@@H](C(=O)O)NC(=O)CCN
C00299	Uridine	HMDB0000296	6029	C00299	C1=CN(C(=O)NC1=O)[C@H]2[C@@H]([C@@H]([C@H](O2)CO)O)O
C01304	2,5-Diamino-6-(5'-phosphoribosylamino)-4-pyrimidineone	METPA0171	NA	C01304	NA
C03221	(2E)-Dodecenoyl-CoA	HMDB0003712	5165851	C03221	CCCCCCCCC/C=C/C(=O)SCCNC(=O)CCNC(=O)[C@@H](C(C)(C)COP(=O)([O-])OP(=O)([O-])OC[C@@H]1[C@H]([C@H]([C@@H](O1)N2C=NC3=C2N=CN=C3N)O)OP(=O)([O-])[O-])O
C05345	Beta-D-Fructose 6-phosphate	HMDB0003971	440641	C05345	C([C@@H]1[C@H]([C@@H]([C@](O1)(CO)O)O)O)OP(=O)(O)O
C00668	Glucose 6-phosphate	HMDB0001401	5958	C00668	OC1O[C@H](COP(O)(O)=O)[C@@H](O)[C@H](O)[C@H]1O
C00103	Glucose 1-phosphate	HMDB0001586	439165	C00103	C([C@@H]1[C@H]([C@@H]([C@H](C(O1)OP(=O)(O)O)O)O)O)O
C01172	Beta-D-Glucose 6-phosphate	HMDB0003498	439427	C01172	C([C@@H]1[C@H]([C@@H]([C@H]([C@@H](O1)O)O)O)O)OP(=O)(O)O
C00275	Mannose 6-phosphate	HMDB0001078	439198	C00275	C([C@@H]1[C@H]([C@@H]([C@@H]([C@@H](O1)O)O)O)O)OP(=O)(O)O
C00636	D-Mannose 1-phosphate	HMDB0006330	644175	C00636	C([C@@H]1[C@H]([C@@H]([C@@H](C(O1)OP(=O)(O)O)O)O)O)O
C01094	3a,6b,7a,12a-Tetrahydroxy-5b-cholanoic acid	HMDB0000399	5283899	C01094	C[C@H](CCC(=O)O)[C@H]1CC[C@@H]2[C@@]1([C@H](C[C@H]3[C@H]2[C@@H]([C@H]([C@H]4[C@@]3(CC[C@H](C4)O)C)O)O)O)C
C01097	D-Tagatose 6-phosphate	HMDB0006873	439396	C01097	C([C@@H]1[C@@H]([C@@H](C(O1)(CO)O)O)O)OP(=O)(O)O
C00446	Galactose 1-phosphate	HMDB0000645	123912	C00446	C([C@@H]1[C@@H]([C@@H]([C@H]([C@H](O1)OP(=O)(O)O)O)O)O)O
C15926	L-Galactose 1-phosphate	METPA1227	NA	C15926	NA
C00092	Glucose 6-phosphate	HMDB0001401	5958	C00092	C([C@@H]1[C@H]([C@@H]([C@H](C(O1)O)O)O)O)OP(=O)(O)O
C00085	Fructose 6-phosphate	HMDB0000124	69507	C00085	C([C@H]([C@H]([C@@H](C(=O)CO)O)O)O)OP(=O)(O)O
C03862	Dolichyl phosphate D-mannose	HMDB0000994	3246168	C03862	C([C@@H]1[C@H]([C@@H]([C@@H]([C@@H](O1)OP(=O)(O)O)O)O)O)O
C03546	D-Myo-inositol 4-phosphate	HMDB0001313	440043	C03546	O[C@@H]1[C@H](O)[C@H](O)[C@@H](OP(O)(O)=O)[C@H](O)[C@H]1O
C04006	1D-myo-Inositol 3-phosphate	HMDB0006814	440194	C04006	[C@H]1([C@@H](C([C@H]([C@@H](C1O)O)O)OP(=O)(O)O)O)O
C01177	Myo-inositol 1-phosphate	HMDB0000213	NA	C01177	O[C@H]1[C@H](O)[C@H](O)[C@H](OP(O)(O)=O)[C@@H](O)[C@@H]1O
C00333	D-Galacturonate	NA	3627	C00333	NA
C03972	Tetrahydrodipicolinate	HMDB0012289	632	C03972	C1CC(N=C(C1)C(=O)O)C(=O)O
C00064	L-Glutamine	HMDB0000641	5961	C00064	C(CC(=O)N)[C@@H](C(=O)O)N
C21029	(R)-3-Ureidoisobutyrate	NA	254816254	C21029	NA
C00065	L-Serine	HMDB0000187	5951	C00065	C([C@@H](C(=O)O)N)O
C00740	D-Serine	HMDB0003406	71077	C00740	C([C@H](C(=O)O)N)O
C00279	D-Erythrose 4-phosphate	HMDB0001321	122357	C00279	C([C@H]([C@H](C=O)O)O)OP(=O)(O)O
C02985	Fucose 1-phosphate	HMDB0001265	439871	C02985	C[C@H]1[C@H]([C@H]([C@@H](C(O1)OP(=O)(O)O)O)O)O
C11831	Divinylprotochlorophyllide	METPA1061	NA	C11831	NA
C05908	Delphinidin	HMDB0003074	68245	C05908	C1=C(C=C(C(=C1O)O)O)C2=C(C=C3C(=CC(=CC3=[O+]2)O)O)O.[Cl-]
C00355	L-Dopa	HMDB0000181	6047	C00355	C1=CC(=C(C=C1C[C@@H](C(=O)O)N)O)O
C00072	Ascorbate	NA	3372	C00072	NA
C00121	D-Ribose	HMDB0000283	5779	C00121	C([C@@H]1[C@H]([C@H](C(O1)O)O)O)O
C00309	D-Ribulose	HMDB0000621	151261	C00309	C([C@H]([C@H](C(=O)CO)O)O)O
C00310	D-Xylulose	HMDB0001644	5289590	C00310	C([C@H]([C@@H](C(=O)CO)O)O)O
C00181	D-Xylose	HMDB0000098	135191	C00181	C1[C@H]([C@@H]([C@H](C(O1)O)O)O)O
C00259	L-Arabinose	HMDB0000646	439195	C00259	C1[C@@H]([C@@H]([C@H](C(O1)O)O)O)O
C01081	Thiamine monophosphate	HMDB0002666	3382778	C01081	CC1=C(SC=[N+]1CC2=CN=C(N=C2N)C)CCOP(=O)(O)[O-]
C00811	4-Hydroxycinnamic acid	HMDB0002035	637542	C00811	C1=CC(=CC=C1/C=C/C(=O)O)O
C00166	Phenylpyruvic acid	HMDB0000205	997	C00166	C1=CC=C(C=C1)CC(=O)C(=O)O
C02763	Enol-phenylpyruvate	HMDB0012225	641637	C02763	C1=CC=C(C=C1)/C=C(/C(=O)O)\O
C10945	Caffeic aldehyde	METPA1697	NA	C10945	NA
C05838	Coumaric acid	HMDB0041592	5280841	C05838	OC(=O)\C=C/C1=CC=CC=C1O
C00032	Heme	HMDB0003178	26945	C00032	CC1=C(CCC(O)=O)C2=CC3=[N+]4C(=CC5=C(C=C)C(C)=C6C=C7C(C=C)=C(C)C8=[N+]7[Fe@]4(N2C1=C8)N56)C(C)=C3CCC(O)=O
C17267	S-Sulfanylglutathione	NA	96023674	C17267	NA
C01674	Chitobiose	HMDB0003556	22833609	C01674	CC(=O)N[C@@H]1[C@H]([C@@H]([C@H](O[C@H]1O)CO)O[C@H]2[C@@H]([C@H]([C@@H]([C@H](O2)CO)O)O)NC(=O)O)O
C00643	5-Hydroxy-L-tryptophan	HMDB0000472	144	C00643	C1=CC2=C(C=C1O)C(=CN2)CC(C(=O)O)N
C04352	4-Phosphopantothenoylcysteine	HMDB0001117	440304	C04352	CC(C)(COP(=O)(O)O)[C@H](C(=O)NCCC(=O)N[C@@H](CS)C(=O)O)O
C02191	Protoporphyrin IX	HMDB0000241	NA	C02191	CC1=C(CCC(O)=O)/C2=C/C3=N/C(=C\C4=C(C)C(C=C)=C(N4)/C=C4\N=C(\C=C\1/N\2)C(C=C)=C4C)/C(C)=C3CCC(O)=O
C00448	Farnesyl pyrophosphate	HMDB0000961	445713	C00448	CC(=CCC/C(=C/CC/C(=C/COP(=O)(O)OP(=O)(O)O)/C)/C)C
C05427	Phytyl diphosphate	NA	7791	C05427	NA
C00227	Acetylphosphate	HMDB0001494	186	C00227	CC(=O)OP(=O)(O)O
C00301	Adenosine diphosphate ribose	HMDB0001178	33576	C00301	C1=NC2=C(C(=N1)N)N=CN2C3C(C(C(O3)COP(=O)(O)OP(=O)(O)OCC4C(C(C(O4)O)O)O)O)O
C04896	PhosphoribosylformiminoAICAR-phosphate	HMDB0012277	1012	C04896	C1=NC(=C(N1C2C(C(C(O2)COP(=O)(O)O)O)O)NC=NC3C(C(C(O3)COP(=O)(O)O)O)O)C(=O)N
C02741	Phosphoribosyl-AMP	HMDB0012276	439795	C02741	C1=NC2=C(N1[C@H]3[C@@H]([C@@H]([C@H](O3)COP(=O)(O)O)O)O)N=CN(C2=N)[C@@H]4[C@@H]([C@@H]([C@H](O4)COP(=O)(O)O)O)O
C04916	Phosphoribulosylformimino-AICAR-P	HMDB0012278	53481398	C04916	C1=NC(=C(N1[C@@H]2[C@H]([C@H]([C@@H](O2)COP(=O)(O)O)O)O)NC=NCC(=O)[C@@H]([C@@H](COP(=O)(O)O)O)O)C(=O)N
C11855	Gibberellin A29-catabolite	METPA1827	NA	C11855	NA
C00068	Thiamine pyrophosphate	HMDB0001372	1132	C00068	CC1=C(SC=[N+]1CC2=CN=C(N=C2N)C)CCOP(=O)(O)OP(=O)(O)O
C06093	Gibberellin A12 7-aldehyde	HMDB0039484	5253705	C06093	CC12CCCC(C)(C1C(C=O)C13CC(CCC21)C(=C)C3)C(O)=O
C18016	3beta-Hydroxy-9beta-pimara-7,15-diene-19,6beta-olide	NA	96024236	C18016	NA
C01909	Dethiobiotin	HMDB0003581	445027	C01909	C[C@H]1[C@H](NC(=O)N1)CCCCCC(=O)O
C00427	Prostaglandin H2	HMDB0001381	445049	C00427	CCCCC[C@@H](/C=C/[C@H]1[C@H]2C[C@@H]([C@@H]1C/C=C\CCCC(=O)O)OO2)O
C00584	Prostaglandin E2	HMDB0001220	5283116	C00584	CCCCC[C@@H](/C=C/[C@H]1[C@@H](CC(=O)[C@@H]1C/C=C\CCCC(=O)O)O)O
C01024	Hydroxymethylbilane	HMDB0001137	788	C01024	C1=C(C(=C(N1)CC2=C(C(=C(N2)CC3=C(C(=C(N3)CC4=C(C(=C(N4)CO)CC(=O)O)CCC(=O)O)CC(=O)O)CCC(=O)O)CC(=O)O)CCC(=O)O)CC(=O)O)CCC(=O)O
C00163	Propionic acid	HMDB0000237	1032	C00163	CCC(=O)O
C02631	Isopropylmaleate	HMDB0012241	5280533	C02631	CC(C)/C(=C/C(=O)O)/C(=O)O
C01137	S-Adenosylmethioninamine	HMDB0000988	439415	C01137	C[S+](CCCN)C[C@@H]1[C@H]([C@H]([C@@H](O1)N2C=NC3=C2N=CN=C3N)O)O
C00214	Thymidine	HMDB0000273	5789	C00214	CC1=CN(C(=O)NC1=O)[C@H]2C[C@@H]([C@H](O2)CO)O
C00931	Porphobilinogen	HMDB0000245	1021	C00931	C1=C(C(=C(N1)CN)CC(=O)O)CCC(=O)O
C03090	5-Phosphoribosylamine	HMDB0001128	439905	C03090	C([C@@H]1[C@H]([C@H]([C@@H](O1)N)O)O)OP(=O)(O)O
C05619	3-(3,4-Dihydroxy-5-methoxy)-2-propenoic acid	HMDB0035484	446834	C05619	COC1=CC(=CC(=C1O)O)/C=C/C(=O)O
C03479	Folinic acid	HMDB0001562	143	C03479	C1C(N(C2=C(N1)NC(=NC2=O)N)C=O)CNC3=CC=C(C=C3)C(=O)NC(CCC(=O)O)C(=O)O
C00234	10-Formyltetrahydrofolate	HMDB0000972	135450591	C00234	C1C(NC2=C(N1)NC(=NC2=O)N)CN(C=O)C3=CC=C(C=C3)C(=O)N[C@@H](CCC(=O)O)C(=O)O
C00117	D-Ribose 5-phosphate	HMDB0001548	439167	C00117	C([C@@H]1[C@H]([C@H](C(O1)O)O)O)OP(=O)(O)O
C00199	D-Ribulose 5-phosphate	HMDB0000618	439184	C00199	C([C@H]([C@H](C(=O)CO)O)O)OP(=O)(O)O
C00620	Ribose 1-phosphate	HMDB0001489	439236	C00620	C([C@@H]1[C@H]([C@H]([C@H](O1)OP(=O)(O)O)O)O)O
C00231	Xylulose 5-phosphate	HMDB0000868	439190	C00231	C([C@H]([C@@H](C(=O)CO)O)O)OP(=O)(O)O
C03906	Beta-L-arabinose 1-phosphate	HMDB0012195	440160	C03906	C1[C@@H]([C@@H]([C@H]([C@H](O1)OP(=O)(O)O)O)O)O
C05674	CMP-N-trimethyl-2-aminoethylphosphonate	HMDB0060072	440755	C05674	C[N+](C)(C)CCP(O)(=O)OP(O)(=O)OC[C@H]1O[C@H]([C@H](O)[C@@H]1O)N1C=CC(=N)N=C1O
C05261	3-Oxotetradecanoyl-CoA	HMDB0003935	11966197	C05261	CCCCCCCCCCCC(=O)CC(=O)SCCNC(=O)CCNC(=O)[C@@H](C(C)(C)COP(=O)(O)OP(=O)(O)OC[C@@H]1[C@H]([C@H]([C@@H](O1)N2C=NC3=C2N=CN=C3N)O)OP(=O)(O)O)O
C08586	delta-Carotene	HMDB0036925	0	C08586	CC(C)=CCC\C(C)=C/C=C/C(/C)=C/C=C/C(/C)=C/C=C/C=C(\C)/C=C/C=C(/C)\C=C\C1C(C)=CCCC1(C)C
C05433	Alpha-Carotene	HMDB0003993	4369188	C05433	CC1=C(C(CCC1)(C)C)/C=C/C(=C/C=C/C(=C/C=C/C=C(\C)/C=C/C=C(\C)/C=C/C2C(=CCCC2(C)C)C)/C)/C
C02094	B-Carotene	HMDB0000561	5280489	C02094	CC1=C(C(CCC1)(C)C)/C=C/C(=C/C=C/C(=C/C=C/C=C(/C=C/C=C(/C=C/C2=C(CCCC2(C)C)C)\C)\C)/C)/C
C05435	gamma-Carotene	HMDB0112262	5280791	C05435	CC(C)=CCC\C(C)=C\C=C\C(\C)=C\C=C\C(\C)=C\C=C\C=C(/C)\C=C\C=C(/C)\C=C\C1=C(C)CCCC1(C)C
C05432	Lycopene	HMDB0003000	53477748	C05432	CC(=CCC/C(=C/C=C/C(=C/C=C/C(=C/C=C/C=C(/C=C/C=C(/C=C/C=C(/CCC=C(C)C)\C)\C)\C)/C)/C)/C)C
C15858	Prolycopene	HMDB0035776	10918539	C15858	CC(=CCC/C(=C/C=C\C(=C/C=C/C(=C/C=C/C=C(/C=C/C=C(\C=C/C=C(/CCC=C(C)C)\C)/C)\C)/C)\C)/C)C
C20484	9-cis-beta-Carotene	HMDB0112264	9828626	C20484	C/C(/C=C/C=C(/C)\C=C\C1=C(C)CCCC1(C)C)=C\C=C\C=C(/C)\C=C\C=C(/C)\C=C\C1=C(C)CCCC1(C)C
C16276	epsilon-Carotene	METPA1272	NA	C16276	NA
C17226	2-(6'-Methylthio)hexylmalic acid	METPA1770	NA	C17226	NA
C17227	3-(6'-Methylthio)hexylmalic acid	NA	96023635	C17227	NA
C00445	5,10-Methenyltetrahydrofolic acid	HMDB0001354	644350	C00445	C1[C@@H]2CN(C=[N+]2C3=C(N1)NC(=NC3=O)N)C4=CC=C(C=C4)C(=O)N[C@@H](CCC(=O)O)C(=O)[O-]
C18015	Momilactone A	NA	96024235	C18015	NA
C00143	5,10-Methylene-THF	HMDB0001533	439175	C00143	C1[C@@H]2CN(CN2C3=C(N1)NC(=NC3=O)N)C4=CC=C(C=C4)C(=O)NC(CCC(=O)O)C(=O)O
C00378	Thiamine	HMDB0000235	1130	C00378	CC1=C(SC=[N+]1CC2=CN=C(N=C2N)C)CCO
C08814	Brassinolide	NA	11007	C08814	NA
C19873	26-Hydroxycastasterone	NA	135626339	C19873	NA
C00250	Pyridoxal	HMDB0001545	1050	C00250	CC1=NC=C(C(=C1O)C=O)CO
C11453	2-C-Methyl-D-erythritol 2,4-cyclodiphosphate	METPA1030	NA	C11453	NA
C05668	3-Hydroxypropionyl-CoA	HMDB0006807	440753	C05668	CC(C)(COP(=O)(O)OP(=O)(O)OC[C@@H]1[C@H]([C@H]([C@@H](O1)N2C=NC3=C2N=CN=C3N)O)OP(=O)(O)O)C(C(=O)NCCC(=O)NCCSC(=O)CCO)O
C04051	5-Aminoimidazole-4-carboxamide	HMDB0003192	9679	C04051	C1=NC(=C(N1)C(=O)N)N
C15514	8'-Hydroxyabscisate	METPA1680	NA	C15514	NA
C01061	4-Fumarylacetoacetic acid	HMDB0001268	5280398	C01061	C(C(=O)CC(=O)O)C(=O)/C=C/C(=O)O
C00455	Nicotinamide ribotide	HMDB0000229	14180	C00455	C1=CC(=C[N+](=C1)[C@H]2[C@@H]([C@@H]([C@H](O2)COP(=O)(O)[O-])O)O)C(=O)N
C02906	Dihydromyricetin	NA	5833	C02906	NA
C02350	(S)(+)-Allantoin	METPA0276	NA	C02350	NA
C05844	5-L-Glutamyl-taurine	HMDB0004195	68759	C05844	C(CC(=O)NCCS(=O)(=O)O)[C@@H](C(=O)O)N
C00534	Pyridoxamine	HMDB0001431	1052	C00534	CC1=NC=C(C(=C1O)CN)CO
C01962	Thiocysteine	HMDB0003585	439614	C01962	C([C@H](C(=O)O)N)SS
C16322	9-Oxononanoic acid	METPA1279	NA	C16322	NA
C05921	Biotinyl-5'-AMP	HMDB0004220	440839	C05921	C1C2C([C@@H](S1)CCCCC(=O)OP(=O)(O)OC[C@@H]3[C@H]([C@H]([C@@H](O3)N4C=NC5=C4N=CN=C5N)O)O)NC(=O)N2
C00793	D-Cysteine	HMDB0003417	92851	C00793	C([C@H](C(=O)O)N)S
C00097	L-Cysteine	HMDB0000574	5862	C00097	C([C@@H](C(=O)O)N)S
C00135	L-Histidine	HMDB0000177	6274	C00135	C1=C(NC=N1)C[C@@H](C(=O)O)N
C06118	4-(4-Deoxy-alpha-D-gluc-4-enuronosyl)-D-galacturonate	METPA0762	NA	C06118	NA
C00546	Pyruvaldehyde	HMDB0001167	880	C00546	CC(=O)C=O
C00436	N-Carbamoylputrescine	HMDB0033458	502	C00436	C(CCNC(=O)N)CN
C11821	5-Hydroxyisourate	HMDB0030097	250388	C11821	C12=NC(=O)NC1(C(=O)NC(=O)N2)O
C04079	D-Pantothenoyl-L-cysteine	HMDB0006834	440217	C04079	CC(C)(CO)[C@H](C(=O)NCCC(=O)N[C@@H](CS)C(=O)O)O
C00022	Pyruvic acid	HMDB0000243	1060	C00022	CC(=O)C(=O)O
C00222	Malonic semialdehyde	HMDB0011111	868	C00222	C(C=O)C(=O)O
C00988	Phosphoglycolic acid	HMDB0000816	529	C00988	C(C(=O)O)OP(=O)(O)O
C03912	1-Pyrroline-5-carboxylic acid	HMDB0001301	6642	C03912	C1CC(N=C1)C(=O)O
C09332	Tetrahydrofolyl-[Glu](2)	HMDB0006825	442163	C09332	C1C(NC2=C(N1)NC(=NC2=O)N)CNC3=CC=C(C=C3)C(=O)NC(CCC(=O)NC(CCC(=O)O)C(=O)O)C(=O)O
C06424	Myristic acid	HMDB0000806	11005	C06424	CCCCCCCCCCCCCC(=O)O
C18218	16-Hydroxy hexadecanoic acid	HMDB0006294	7058075	C18218	C(CCCCCCCC(=O)[O-])CCCCCCCO
C00189	Ethanolamine	HMDB0000149	700	C00189	C(CO)N
C04677	AICAR	HMDB0001517	65110	C04677	C1=NC(=C(N1[C@H]2[C@@H]([C@@H]([C@H](O2)COP(=O)(O)O)O)O)N)C(=O)N
C00108	2-Aminobenzoic acid	HMDB0001123	227	C00108	C1=CC=C(C(=C1)C(=O)O)N
C00568	p-Aminobenzoic acid	HMDB0001392	978	C00568	C1=CC(=CC=C1C(=O)O)N
C00385	Xanthine	HMDB0000292	1188	C00385	C1=NC2=C(N1)C(=O)NC(=O)N2
C04742	15(S)-HETE	HMDB0003876	9966861	C04742	CCCCC[C@@H](/C=C/C=C\C/C=C\C/C=C\CCCC(=O)O)O
C04805	5-HETE	HMDB0011134	5280733	C04805	CCCCC/C=C\C/C=C\C/C=C\C=C\[C@H](CCCC(=O)O)O
C18022	Red chlorophyll catabolite	METPA1635	NA	C18022	NA
C00036	Oxalacetic acid	HMDB0000223	970	C00036	C(C(=O)C(=O)O)C(=O)O
C00026	Oxoglutaric acid	HMDB0000208	51	C00026	C(CC(=O)O)C(=O)C(=O)O
C00818	Glucaric acid	HMDB0000663	33037	C00818	[C@H]([C@@H]([C@@H](C(=O)O)O)O)([C@H](C(=O)O)O)O
C20258	HTPA	MA3TEM047	163311998	C20258	NA
C00437	N-Acetylornithine	HMDB0003357	439232	C00437	CC(=O)N[C@@H](CCCN)C(=O)O
C00134	Putrescine	HMDB0001414	1045	C00134	C(CCN)CN
C06095	Gibberellin A44 diacid	METPA1647	NA	C06095	NA
C00016	FAD	HMDB0001248	643975	C00016	CC1=CC2=C(C=C1C)N(C3=NC(=O)NC(=O)C3=N2)C[C@@H]([C@@H]([C@@H](COP(=O)(O)OP(=O)(O)OC[C@@H]4[C@H]([C@H]([C@@H](O4)N5C=NC6=C5N=CN=C6N)O)O)O)O)O
C04376	5'-Phosphoribosyl-N-formylglycinamide	HMDB0001308	16048611	C04376	C([C@@H]1[C@H]([C@H]([C@@H](O1)NC(=O)CNC=O)O)O)OP(=O)(O)O
C02034	Gibberellin A19	HMDB0036896	4632015	C02034	CC1(CCCC2(C=O)C3CCC4(O)CC3(CC4=C)C(C12)C(O)=O)C(O)=O
C11861	Gibberellin A124	HMDB0037103	0	C11861	[H][C@@]12C[C@H](O)[C@]3(O)C[C@]1(CC3=C)[C@@H](C(O)=O)[C@@]1([H])[C@@]22CCC[C@]1(C)C(=O)OC2
C18167	Secoisolariciresinol	HMDB0013692	65373	C18167	COC1=C(C=CC(=C1)C[C@@H](CO)[C@@H](CC2=CC(=C(C=C2)O)OC)CO)O
C20456	(+)-Secoisolariciresinol	NA	163312193	C20456	NA
C08281	Behenic acid	HMDB0000944	8215	C08281	CCCCCCCCCCCCCCCCCCCCCC(=O)O
C03516	Magnesium protoporphyrin	METPA0404	NA	C03516	NA
C12248	5-hydroxy-2-oxo-4-ureido-2,5-dihydro-1H-imidazole-5-carboxylate	HMDB0059663	443736	C12248	NC(=O)NC1=NC(=O)NC1(O)C(O)=O
C00429	Dihydrouracil	HMDB0000076	649	C00429	C1CNC(=O)NC1=O
C02512	3-Cyano-L-alanine	METPA0300	NA	C02512	NA
C00239	dCMP	HMDB0001202	13945	C00239	C1[C@@H]([C@H](O[C@H]1N2C=CC(=NC2=O)N)COP(=O)(O)O)O
C01268	5-Amino-6-(5'-phosphoribosylamino)uracil	METPA0159	NA	C01268	NA
C00389	Quercetin	HMDB0005794	5280343	C00389	C1=CC(=C(C=C1C2=C(C(=O)C3=C(C=C(C=C3O2)O)O)O)O)O
C07330	3-Methyl-2-butenal	NA	9538	C07330	NA
C01598	Melatonin	HMDB0001389	896	C01598	CC(=O)NCCC1=CNC2=C1C=C(C=C2)OC
C16405	Homoeriodictyol chalcone	METPA1731	NA	C16405	NA
C00062	L-Arginine	HMDB0000517	6322	C00062	C(C[C@@H](C(=O)O)N)CN=C(N)N
C12206	Caffeyl alcohol	METPA1708	NA	C12206	NA
C05947	L-erythro-4-Hydroxyglutamate	NA	8231	C05947	NA
C20692	9-cis-10'-Apo-beta-carotenal	NA	172232412	C20692	NA
C06007	(R) 2,3-Dihydroxy-3-methylvalerate	HMDB0012140	448154	C06007	CC[C@](C)([C@H](C(=O)O)O)O
C00522	(R)-Pantoate	METPA0053	NA	C00522	NA
C00418	Mevalonic acid	HMDB0000227	449	C00418	CC(CCO)(CC(=O)O)O
C00415	Dihydrofolic acid	HMDB0001056	98792	C00415	C1C(=NC2=C(N1)NC(=NC2=O)N)CNC3=CC=C(C=C3)C(=O)N[C@@H](CCC(=O)O)C(=O)O
C05638	5-Hydroxykynurenamine	HMDB0004076	164719	C05638	C1=CC(=C(C=C1O)C(=O)CCN)N
C00008	ADP	HMDB0001341	6022	C00008	C1=NC2=C(C(=N1)N)N=CN2[C@H]3[C@@H]([C@@H]([C@H](O3)COP(=O)(O)OP(=O)(O)O)O)O
C00361	dGDP	HMDB0000960	439220	C00361	C1[C@@H]([C@H](O[C@H]1N2C=NC3=C2NC(=NC3=O)N)COP(=O)(O)OP(=O)(O)O)O
C00054	Adenosine 3',5'-diphosphate	HMDB0000061	159296	C00054	C1=NC2=C(C(=N1)N)N=CN2[C@H]3[C@@H]([C@@H]([C@H](O3)COP(=O)(O)O)OP(=O)(O)O)O
C17230	2-(7'-Methylthio)heptylmalic acid	METPA1771	NA	C17230	NA
C17231	3-(7'-Methylthio)heptylmalic acid	NA	96023639	C17231	NA
C17743	Bisdemethoxycurcumin	HMDB0002114	5315472	C17743	C1=CC(=CC=C1/C=C/C(=O)CC(=O)/C=C/C2=CC=C(C=C2)O)O
C02325	Sinapyl alcohol	HMDB0013070	5280507	C02325	COC1=CC(=CC(=C1O)OC)/C=C/CO
C00093	Glycerol 3-phosphate	HMDB0000126	439162	C00093	C([C@H](COP(=O)(O)O)O)O
C05385	D-Glucuronic acid 1-phosphate	HMDB0003976	440650	C05385	[C@@H]1([C@@H]([C@H](OC([C@@H]1O)OP(=O)(O)O)C(=O)O)O)O
C04037	1-Phospho-alpha-D-galacturonate	METPA0457	NA	C04037	NA
C05951	Leukotriene D4	HMDB0003080	6435286	C05951	CCCCC/C=C\C/C=C\C=C\C=C\[C@H]([C@H](CCCC(=O)O)O)SCC(C(=O)NCC(=O)O)N
C00441	L-Aspartate-semialdehyde	HMDB0012249	439235	C00441	C(C=O)[C@@H](C(=O)O)N
C01234	1-Aminocyclopropanecarboxylic acid	HMDB0036458	535	C01234	NC1(CC1)C(O)=O
C01102	O-Phosphohomoserine	HMDB0003484	151187	C01102	C(COP(=O)(O)O)[C@@H](C(=O)O)N
C00379	D-Xylitol	HMDB0002917	6912	C00379	C([C@H](C([C@H](CO)O)O)O)O
C02139	Chlorophyllide	METPA0252	NA	C02139	NA
C11829	13(1)-Hydroxy-magnesium-protoporphyrin IX 13-monomethyl ester	METPA1059	NA	C11829	NA
C00353	Geranylgeranyl-PP	HMDB0004486	447277	C00353	CC(=CCC/C(=C/CC/C(=C/CC/C(=C/COP(=O)(O)OP(=O)(O)O)/C)/C)/C)C
C06089	ent-Copalyl diphosphate	METPA0756	NA	C06089	NA
C13453	Xanthoxin	HMDB0014693	586193	C13453	COC1=C2OC(=O)C=CC2=CC2=C1OC=C2
C04083	N6-(delta2-Isopentenyl)-adenine	METPA1684	NA	C04083	NA
C00836	Sphinganine	HMDB0000269	91486	C00836	CCCCCCCCCCCCCCC[C@H]([C@H](CO)N)O
C11537	(2R)-3-Sulfolactate	MA3TEM029	13704	C11537	CC1=NC(=NC(=N1)OCC=C)C(Cl)(Cl)Cl
C05983	Propinol adenylate	HMDB0006806	440863	C05983	CCC(=O)OP(=O)(O)OC[C@@H]1[C@H]([C@H]([C@@H](O1)N2C=NC3=C2N=CN=C3N)O)O
C00408	Pipecolic acid	HMDB0000070	849	C00408	C1CCNC(C1)C(=O)O
C05936	N4-Acetylaminobutanal	HMDB0004226	440850	C05936	CC(=O)NCCCC=O
C03657	1,4-Dihydroxy-2-naphthoate	METPA0422	NA	C03657	NA
C01594	Lansoprazole	HMDB0005008	3883	C01594	CC1=C(C=CN=C1CS(=O)C2=NC3=CC=CC=C3N2)OCC(F)(F)F
C11874	Kaur-16-en-18-oic acid	METPA1653	NA	C11874	NA
C20149	9beta-Pimara-7,15-dien-19-oate	NA	135626609	C20149	NA
C20208	syn-Stemoden-19-oate	NA	163311951	C20208	NA
C21826	ent-3beta-Hydroxycassa-12,15-dien-2-one	NA	NA	C21826	NA
C06428	Eicosapentaenoic acid	HMDB0001999	446284	C06428	CC/C=C\C/C=C\C/C=C\C/C=C\C/C=C\CCCC(=O)O
C00003	NAD	HMDB0000902	5893	C00003	C1=CC(=C[N+](=C1)[C@H]2[C@@H]([C@@H]([C@H](O2)COP(=O)(O)OP(=O)(O)OC[C@@H]3[C@H]([C@H]([C@@H](O3)N4C=NC5=C4N=CN=C5N)O)O)O)O)C(=O)N
C00794	Sorbitol	HMDB0000247	5780	C00794	C([C@H]([C@H]([C@@H]([C@H](CO)O)O)O)O)O
C01182	D-Ribulose 1,5-bisphosphate	METPA0139	NA	C01182	NA
C00526	Deoxyuridine	HMDB0000012	13712	C00526	C1[C@@H]([C@H](O[C@H]1N2C=CC(=O)NC2=O)CO)O
C04732	5-Amino-6-ribitylamino uracil	HMDB0011106	221	C04732	C(C(C(C(CO)O)O)O)NC1=C(C(=O)NC(=O)N1)N
C00018	Pyridoxal 5'-phosphate	HMDB0001491	1051	C00018	CC1=NC=C(C(=C1O)C=O)COP(=O)(O)O
C03150	Nicotinamide riboside	HMDB0000855	439924	C03150	C1=CC(=C[N+](=C1)[C@H]2[C@@H]([C@@H]([C@H](O2)CO)O)O)C(=O)N
C01245	Inositol 1,4,5-trisphosphate	HMDB0001498	439456	C01245	[C@H]1([C@@H]([C@H]([C@@H]([C@H]([C@@H]1OP(=O)(O)O)O)OP(=O)(O)O)OP(=O)(O)O)O)O
C01243	Inositol 1,3,4-trisphosphate	HMDB0001143	439455	C01243	[C@H]1([C@H]([C@@H]([C@H]([C@H]([C@H]1OP(=O)(O)O)O)OP(=O)(O)O)OP(=O)(O)O)O)O
C16429	trans-Zeatin riboside diphosphate	METPA1691	NA	C16429	NA
C00504	Folic acid	HMDB0000121	6037	C00504	C1=CC(=CC=C1C(=O)N[C@@H](CCC(=O)O)C(=O)O)NCC2=CN=C3C(=N2)C(=O)N=C(N3)N
C06006	(S)-2-Aceto-2-hydroxybutanoic acid	HMDB0006900	440875	C06006	CC[C@](C(=O)C)(C(=O)O)O
C15780	5-Dehydroepisterol	HMDB0006848	10894570	C15780	C[C@H](CCC(=C)C(C)C)[C@H]1CC[C@@H]2[C@@]1(CC[C@H]3C2=CC=C4[C@@]3(CC[C@@H](C4)O)C)C
C15778	5,7,24(28)-Ergostatrienol	HMDB0060404	46173808	C15778	CC(C)C(=C)CC[C@@H](C)[C@H]1CC[C@H]2C3=CC=C4C[C@@H](O)CC[C@]4(C)C3CC[C@]12C
C22122	Episterone	NA	NA	C22122	NA
C00561	Mandelonitrile	HMDB0060486	9548674	C00561	O[C@@H](C#N)C1=CC=CC=C1
C11873	ent-16-Kauren-19-al	HMDB0036728	0	C11873	CC1(CCCC2(C)C3CCC4CC3(CC4=C)CCC12)C=O
C05640	Cinnavalininate	HMDB0004078	114918	C05640	C1=CC(=C2C(=C1)OC3=CC(=O)C(=C(C3=N2)C(=O)O)N)C(=O)O
C01269	5-O-(1-Carboxyvinyl)-3-phosphoshikimate	METPA0160	NA	C01269	NA
C00852	Chlorogenic acid	HMDB0003164	1794427	C00852	C1[C@H]([C@H]([C@@H](C[C@@]1(C(=O)O)O)OC(=O)/C=C/C2=CC(=C(C=C2)O)O)O)O
C04133	N-Acetyl-L-glutamyl 5-phosphate	HMDB0006456	440236	C04133	CC(=O)N[C@@H](CCC(=O)OP(=O)(O)O)C(=O)O
C04236	2-Isopropyl-3-oxosuccinate	HMDB0012149	5462259	C04236	CC(C)[C@@H](C(=O)C(=O)O)C(=O)O
C00493	Shikimic acid	HMDB0003070	8742	C00493	C1[C@H]([C@@H]([C@@H](C=C1C(=O)O)O)O)O
C05125	2-(a-Hydroxyethyl)thiamine diphosphate	HMDB0003904	440568	C05125	CC1=C(SC(=[N+]1CC2=CN=C(N=C2N)C)C(C)O)CCOP(=O)(O)OP(=O)(O)O
C21015	gamma-L-Glutamyl-L-2-aminobutyrate	NA	254741469	C21015	NA
C05906	Leucocyanidin	METPA1714	NA	C05906	NA
C12136	(-)-Epigallocatechin	HMDB0038361	72277	C12136	O[C@@H]1CC2=C(O)C=C(O)C=C2O[C@@H]1C1=CC(O)=C(O)C(O)=C1
C12127	(+)-Gallocatechin	HMDB0038365	65084	C12127	O[C@H]1CC2=C(O)C=C(O)C=C2O[C@@H]1C1=CC(O)=C(O)C(O)=C1
C00122	Fumaric acid	HMDB0000134	444972	C00122	C(=C/C(=O)O)\C(=O)O
C03461	2-trans,6-trans-Farnesal	HMDB0060356	5280598	C03461	CC(C)=CCC\C(C)=C\CC\C(C)=C\C=O
C00186	L-Lactic acid	HMDB0000190	61503	C00186	C[C@@H](C(=O)O)O
C00160	Glycolate	NA	3460	C00160	NA
C00148	L-Proline	HMDB0000162	145742	C00148	C1C[C@H](NC1)C(=O)O
C13482	Phosphodimethylethanolamine	HMDB0060244	151438	C13482	CN(C)CCOP(O)(O)=O
C15978	2-Methyl-1-hydroxybutyl-ThPP	HMDB0012310	23724627	C15978	CC[C@H](C)C(C1=[N+](C(=C(S1)CCOP(=O)(O)OP(=O)(O)O)C)CC2=CN=C(N=C2N)C)O
C15974	3-Methyl-1-hydroxybutyl-ThPP	HMDB0006865	23724625	C15974	CC1=C(SC(=[N+]1CC2=CN=C(N=C2N)C)C(CC(C)C)O)CCOP(=O)(O)OP(=O)(O)O
C02843	Long-chain acyl-CoA	MA3TEM004	5783	C02843	C1=CC(=C(C(=C1C(=O)O)Cl)Cl)Cl
C04076	Allysine	HMDB0001263	207	C04076	C(CC=O)CC(C(=O)O)N
C02946	4-Acetamidobutanoic acid	HMDB0003681	18189	C02946	CC(=O)NCCCC(=O)O
C11435	4-(Cytidine 5'-diphospho)-2-C-methyl-D-erythritol	METPA1028	NA	C11435	NA
C11876	(ent-6alpha,7alpha)-6,7-Dihydroxy-16-kauren-19-oic acid	HMDB0036763	0	C11876	CC12CCCC(C)(C1C(O)C(O)C13CC(CCC21)C(=C)C3)C(O)=O
C04780	8-[(1R,2R)-3-Oxo-2-{(Z)-pent-2-enyl}cyclopentyl]octanoate	METPA0541	NA	C04780	NA
C18902	Methylselenic acid	HMDB0060489	161597	C18902	C[Se](O)=O
C08325	Amygdalin	HMDB0035030	34751	C08325	C1=CC=C(C=C1)C(C#N)OC2C(C(C(C(O2)COC3C(C(C(C(O3)CO)O)O)O)O)O)O
C05130	Imidazole-4-acetaldehyde	HMDB0003905	150841	C05130	C1=C(NC=N1)CC=O
C00155	Homocysteine	HMDB0000742	778	C00155	C(CS)C(C(=O)O)N
C00447	Sedoheptulose 1,7-bisphosphate	HMDB0060274	164735	C00447	O[C@H](COP(O)(O)=O)[C@@H](O)[C@@H](O)[C@H](O)C(=O)COP(O)(O)=O
C00957	3-Mercaptopyruvic acid	HMDB0001368	98	C00957	C(C(=O)C(=O)O)S
C00094	Sulfite	HMDB0000240	1099	C00094	[O-]S(=O)[O-]
C00116	Glycerol	HMDB0000131	753	C00116	C(C(CO)O)O
C00885	Isochorismate	METPA0094	NA	C00885	NA
C00647	Pyridoxamine 5'-phosphate	HMDB0001555	1053	C00647	CC1=NC=C(C(=C1O)CN)COP(=O)(O)O
C05911	Pentahydroxyflavanone	METPA1717	NA	C05911	NA
C01617	Taxifolin	METPA0191	NA	C01617	NA
C14155	Gamma-Tocotrienol	HMDB0012958	5282349	C14155	CC1=C(C=C2CC[C@@](OC2=C1C)(C)CC/C=C(\C)/CC/C=C(\C)/CCC=C(C)C)O
C20738	6-Geranylgeranyl-2,3-dimethylbenzene-1,4-diol	NA	254741206	C20738	NA
C14153	Alpha-Tocotrienol	HMDB0006327	5282347	C14153	CC1=C(C(=C2CC[C@@](OC2=C1C)(C)CC/C=C(\C)/CC/C=C(\C)/CCC=C(C)C)C)O
C14154	epsilon-Tocopherol	HMDB0030554	9844470	C14154	CC1=CC(=C(C2=C1OC(CC2)(C)CC/C=C(\C)/CC/C=C(\C)/CCC=C(C)C)C)O
C15791	Teasterone	METPA1204	NA	C15791	NA
C15793	2-Deoxycastasterone	HMDB0034423	0	C15793	CC(C)C(C)C(O)C(O)C(C)C1CCC2C3CC(=O)C4CC(O)CCC4(C)C3CCC12C
C01019	L-Fucose	HMDB0000174	25310	C01019	C[C@H]1[C@H]([C@H]([C@@H](C(O1)O)O)O)O
C08491	Jasmonic acid	HMDB0032797	5281166	C08491	CC/C=C\C[C@@H]1[C@H](CCC1=O)CC(=O)O
C05697	Selenate	HMDB0062761	26473	C05697	O[Se](O)(=O)=O
