# Supplementary material for: Targeted and Untargeted Metabolomic Analyses Reveal Organ Specificity of Specialized Metabolites in the Model Grass Brachypodium distachyon
Source: Molecules. 2022 Sep 13;27(18):5956. doi: 10.3390/molecules27185956 (PMC9506550; doi:10.3390/molecules27185956)
Supplement: Supplementary file 1 [file molecules-27-05956-s001.zip › Supplementary Table S2.xlsx]

## Sheet: pathway results
Supplementary Table S2. Pathway mapping conducted on m/z signals significantly differentiating roots of Bd21 and Bd3‐1 lines; “pathway results” sheet contains scoring of pathway enrichment; “name map” sheet contains metabolites annotation to Kyoto Encyclopedia of Genes and Genomes (KEGG) database and conversion of KEGG identifiers to Human Metabolome Database (HMDB) and PubChem identifiers. Total…
	Total	Expected	Hits	Raw p	#NAME?	Holm adjust	FDR	Impact
Galactose metabolism	27	10.642	25	7.8e-09	8.1079	7.41e-07	7.41e-07	1
Diterpenoid biosynthesis	47	18.525	32	5e-05	4.3011	0.0046988	0.0012531	0.61959
Flavonoid biosynthesis	47	18.525	32	5e-05	4.3011	0.0046988	0.0012531	0.64212
Valine, leucine and isoleucine biosynthesis	22	8.6714	18	5.28e-05	4.2777	0.0048542	0.0012531	0.68294
Caffeine metabolism	10	3.9416	10	8.61e-05	4.0649	0.0078367	0.0016362	0
Pentose phosphate pathway	19	7.489	15	0.00049071	3.3092	0.044164	0.0076658	0.85473
One carbon pool by folate	8	3.1532	8	0.00056485	3.2481	0.050272	0.0076658	1
Flavone and flavonol biosynthesis	12	4.7299	10	0.0023743	2.6245	0.20894	0.025063	0
2-Oxocarboxylic acid metabolism	12	4.7299	10	0.0023743	2.6245	0.20894	0.025063	0
Biosynthesis of secondary metabolites - other antibiotics	6	2.3649	6	0.0036884	2.4332	0.3172	0.03504	1
Vitamin B6 metabolism	11	4.3357	9	0.0051222	2.2905	0.43538	0.041373	0.76281
Fructose and mannose metabolism	20	7.8831	14	0.0052473	2.2801	0.44077	0.041373	0.87643
Starch and sucrose metabolism	22	8.6714	15	0.0056616	2.2471	0.46991	0.041373	0.83039
Nicotinate and nicotinamide metabolism	13	5.124	10	0.0066729	2.1757	0.54718	0.04528	0.74748
Carbon fixation in photosynthetic organisms	21	8.2773	14	0.01012	1.9948	0.81974	0.06203	0.67397
Pantothenate and CoA biosynthesis	23	9.0656	15	0.010447	1.981	0.83577	0.06203	0.85098
Pyrimidine metabolism	38	14.978	22	0.014988	1.8242	1	0.083759	0.57752
Arginine biosynthesis	18	7.0948	12	0.017261	1.7629	1	0.091101	0.8534
Terpenoid backbone biosynthesis	29	11.431	17	0.027047	1.5679	1	0.13523	0.58826
Monoterpenoid biosynthesis	6	2.3649	5	0.038014	1.4201	1	0.17197	0
C5-Branched dibasic acid metabolism	6	2.3649	5	0.038014	1.4201	1	0.17197	1
Alanine, aspartate and glutamate metabolism	22	8.6714	13	0.047663	1.3218	1	0.2009	0.80575
Tyrosine metabolism	18	7.0948	11	0.050754	1.2945	1	0.2009	0.82164
Ascorbate and aldarate metabolism	18	7.0948	11	0.050754	1.2945	1	0.2009	0.82836
Tryptophan metabolism	23	9.0656	13	0.071208	1.1475	1	0.27059	0.65517
Stilbenoid, diarylheptanoid and gingerol biosynthesis	11	4.3357	7	0.091501	1.0386	1	0.3223	0.5
Lysine biosynthesis	9	3.5474	6	0.092276	1.0349	1	0.3223	0.45945
Glycolysis / Gluconeogenesis	26	10.248	14	0.094994	1.0223	1	0.3223	0.66792
Porphyrin and chlorophyll metabolism	47	18.525	23	0.11441	0.94152	1	0.3748	0.5683
Zeatin biosynthesis	21	8.2773	11	0.15857	0.79977	1	0.50215	0.88348
Anthocyanin biosynthesis	6	2.3649	4	0.17072	0.76771	1	0.52318	0
Cyanoamino acid metabolism	26	10.248	13	0.18028	0.74405	1	0.52892	0.35715
Pentose and glucuronate interconversions	17	6.7006	9	0.18373	0.73582	1	0.52892	0.54763
Phenylalanine, tyrosine and tryptophan biosynthesis	22	8.6714	11	0.20938	0.67906	1	0.56832	0.36185
Thiamine metabolism	22	8.6714	11	0.20938	0.67906	1	0.56832	0.86127
Riboflavin metabolism	11	4.3357	6	0.23294	0.63275	1	0.61471	0.80001
Purine metabolism	63	24.832	28	0.23954	0.62063	1	0.61502	0.47345
Limonene and pinene degradation	5	1.9708	3	0.30713	0.51268	1	0.76783	1
Histidine metabolism	17	6.7006	8	0.34008	0.46842	1	0.8284	0.39535
Amino sugar and nucleotide sugar metabolism	50	19.708	21	0.40427	0.39333	1	0.96013	0.6062
Arginine and proline metabolism	28	11.036	12	0.42325	0.3734	1	0.9807	0.55993
Isoquinoline alkaloid biosynthesis	6	2.3649	3	0.44354	0.35307	1	0.99648	0.41176
Cysteine and methionine metabolism	46	18.131	19	0.45104	0.34579	1	0.99648	0.47893
alpha-Linolenic acid metabolism	27	10.642	11	0.51702	0.28649	1	1	0.4103
Butanoate metabolism	17	6.7006	7	0.53274	0.27349	1	1	0.22727
Phenylpropanoid biosynthesis	35	13.795	14	0.53644	0.27048	1	1	0.34806
Arachidonic acid metabolism	12	4.7299	5	0.5455	0.2632	1	1	0
Glycine, serine and threonine metabolism	33	13.007	13	0.56767	0.2459	1	1	0.27047
Aminoacyl-tRNA biosynthesis	46	18.131	18	0.57277	0.24202	1	1	0.16667
Phosphonate and phosphinate metabolism	5	1.9708	2	0.65323	0.18494	1	1	0
Monobactam biosynthesis	8	3.1532	3	0.67285	0.17208	1	1	0
Sesquiterpenoid and triterpenoid biosynthesis	8	3.1532	3	0.67285	0.17208	1	1	0
Sphingolipid metabolism	17	6.7006	6	0.72101	0.14206	1	1	0.47115
Inositol phosphate metabolism	28	11.036	10	0.72248	0.14117	1	1	0.14853
Taurine and hypotaurine metabolism	6	2.3649	2	0.75807	0.12029	1	1	0.5
Phenylalanine metabolism	12	4.7299	4	0.76306	0.11744	1	1	0.61539
beta-Alanine metabolism	18	7.0948	6	0.77799	0.10902	1	1	0.44444
Selenocompound metabolism	13	5.124	4	0.82159	0.085342	1	1	0.65546
Brassinosteroid biosynthesis	20	7.8831	6	0.86492	0.063026	1	1	0.42593
Synthesis and degradation of ketone bodies	4	1.5766	1	0.86565	0.062657	1	1	0
Ubiquinone and other terpenoid-quinone biosynthesis	35	13.795	11	0.87687	0.057066	1	1	0.30982
Tropane, piperidine and pyridine alkaloid biosynthesis	8	3.1532	2	0.88807	0.051555	1	1	0
Lysine degradation	18	7.0948	5	0.89865	0.046409	1	1	0.25
Biosynthesis of secondary metabolites - unclassified	5	1.9708	1	0.91876	0.036799	1	1	0
Folate biosynthesis	27	10.642	7	0.95373	0.020573	1	1	0.37452
Glutathione metabolism	27	10.642	7	0.95373	0.020573	1	1	0.47062
Glycerolipid metabolism	21	8.2773	5	0.95965	0.017885	1	1	0.06275
Valine, leucine and isoleucine degradation	37	14.584	10	0.96134	0.017124	1	1	0.10455
Sulfur metabolism	15	5.9123	3	0.97063	0.012945	1	1	0.14641
Biosynthesis of unsaturated fatty acids	22	8.6714	5	0.97086	0.012842	1	1	0
Phosphatidylinositol signaling system	26	10.248	6	0.97639	0.010378	1	1	0.04974
Nitrogen metabolism	12	4.7299	2	0.97888	0.0092727	1	1	0
Propanoate metabolism	20	7.8831	4	0.9825	0.0076683	1	1	0.15479
Glycerophospholipid metabolism	37	14.584	9	0.98353	0.0072111	1	1	0.21437
Cutin, suberine and wax biosynthesis	14	5.5182	2	0.99118	0.0038458	1	1	0.25
Fatty acid elongation	23	9.0656	4	0.99429	0.0024872	1	1	0
Glyoxylate and dicarboxylate metabolism	29	11.431	5	0.99755	0.0010659	1	1	0.11696
Pyruvate metabolism	22	8.6714	3	0.99827	0.00075059	1	1	0.06346
Biotin metabolism	18	7.0948	2	0.99854	0.00063344	1	1	0.16923
Glycosylphosphatidylinositol (GPI)-anchor biosynthesis	13	5.124	1	0.99857	0.00062081	1	1	0.20571
Citrate cycle (TCA cycle)	20	7.8831	2	0.99942	0.00025236	1	1	0.11494
Fatty acid degradation	37	14.584	6	0.9995	0.00021811	1	1	0.051
N-Glycan biosynthesis	35	13.795	5	0.99976	0.00010406	1	1	0.07466
Carotenoid biosynthesis	42	16.555	5	0.99999	5.85e-06	1	1	0.00778
Steroid biosynthesis	40	15.766	2	1	1.67e-08	1	1	0.0355
Fatty acid biosynthesis	56	22.073	4	1	1.35e-09	1	1	0.01123

## Sheet: name map
Query	Match	HMDB	PubChem	KEGG	SMILES	Comment
C00519	Hypotaurine	HMDB0000965	107812	C00519	C(CS(=O)O)N	1
C16359	1-Methyluric acid	HMDB0003099	69726	C16359	CN1C(=O)C2=C(NC(=O)N2)NC1=O	1
C16355	7-Methyluric acid	HMDB0011107	69160	C16355	CN1C2=C(NC(=O)NC2=O)NC1=O	1
C00831	Pantetheine	HMDB0003426	479	C00831	CC(C)(CO)C(C(=O)NCCC(=O)NCCS)O	1
C05904	Pelargonidin	HMDB0003263	67249	C05904	C1=CC(=CC=C1C2=C(C=C3C(=CC(=CC3=[O+]2)O)O)O)O.[Cl-]	1
C04051	5-Aminoimidazole-4-carboxamide	HMDB0003192	9679	C04051	C1=NC(=C(N1)C(=O)N)N	1
C00470	Pectic acid	HMDB0003363	445929	C00470	[C@@H]1([C@H]([C@H](O[C@@H]([C@@H]1O)O)C(=O)O)O)O	1
C00191	D-Glucuronic acid	HMDB0000127	94715	C00191	[C@@H]1([C@@H]([C@H](O[C@@H]([C@@H]1O)O)C(=O)O)O)O	1
C00719	Betaine	HMDB0000043	247	C00719	C[N+](C)(C)CC(=O)[O-]	1
C00183	L-Valine	HMDB0000883	6287	C00183	CC(C)[C@@H](C(=O)O)N	1
C01077	Acetylhomoserine	HMDB0029423	528	C01077	CC(=O)OCCC(C(=O)O)N	1
C04076	Allysine	HMDB0001263	207	C04076	C(CC=O)CC(C(=O)O)N	1
C00956	Aminoadipic acid	HMDB0000510	469	C00956	C(CC(C(=O)O)N)CC(=O)O	1
C02946	4-Acetamidobutanoic acid	HMDB0003681	18189	C02946	CC(=O)NCCCC(=O)O	1
C18796	(2R)-2-Hydroxy-2-methylbutanenitrile	HMDB0060309	12650900	C18796	CC[C@@](C)(O)C#N	1
C16405	Homoeriodictyol chalcone	METPA1731	NA	C16405	NA	1
C12208	3-O-p-Coumaroylquinic acid	HMDB0029681	9945785	C12208	O[C@@H]1C[C@@](O)(C[C@@H](OC(=O)\C=C\C2=CC=C(O)C=C2)[C@H]1O)C(O)=O	1
C02947	4-Coumaroylshikimate	METPA1693	NA	C02947	NA	1
C01530	Stearic acid	HMDB0000827	5281	C01530	CCCCCCCCCCCCCCCCCC(=O)O	1
C08604	Cyanidin 3-glucoside	HMDB0030684	4481259	C08604	C1=CC(=C(C=C1C2=C(C=C3C(=CC(=CC3=[O+]2)O)O)OC4C(C(C(C(O4)CO)O)O)O)O)O	1
C10434	Dattelic acid	HMDB0033999	6124136	C10434	C1C(C(C(C=C1C(=O)O)O)O)OC(=O)/C=C/C2=CC(=C(C=C2)O)O	1
C12144	Phytosphingosine	HMDB0004610	122121	C12144	CCCCCCCCCCCCCC[C@H]([C@H]([C@H](CO)N)O)O	1
C01210	N-Methylethanolamine phosphate	METPA0145	NA	C01210	NA	1
C08325	Amygdalin	HMDB0035030	34751	C08325	C1=CC=C(C=C1)C(C#N)OC2C(C(C(C(O2)COC3C(C(C(C(O3)CO)O)O)O)O)O)O	1
C04672	(9Z,15Z)-(13S)-12,13-Epoxyoctadeca-9,11,15-trienoic acid	METPA0529	NA	C04672	NA	1
C00836	Sphinganine	HMDB0000269	91486	C00836	CCCCCCCCCCCCCCC[C@H]([C@H](CO)N)O	1
C01750	Quercitrin	HMDB0033751	5280459	C01750	C[C@H]1[C@@H]([C@H]([C@H]([C@@H](O1)OC2=C(OC3=CC(=CC(=C3C2=O)O)O)C4=CC(=C(C=C4)O)O)O)O)O	1
C12249	Kaempferol-3-O-glucoside	HMDB0037429	5282102	C12249	OC[C@H]1O[C@@H](OC2=C(OC3=CC(O)=CC(O)=C3C2=O)C2=CC=C(O)C=C2)[C@H](O)[C@@H](O)[C@@H]1O	1
C04079	D-Pantothenoyl-L-cysteine	HMDB0006834	440217	C04079	CC(C)(CO)[C@H](C(=O)NCCC(=O)N[C@@H](CS)C(=O)O)O	1
C01134	Pantetheine 4'-phosphate	HMDB0001416	987	C01134	CC(C)(COP(=O)(O)O)C(C(=O)NCCC(=O)NCCS)O	1
C00019	S-Adenosylmethionine	HMDB0001185	16757548	C00019	C[S+](CC[C@H](C(=O)O)N)C[C@@H]1[C@H]([C@H]([C@@H](O1)N2C=NC3=C2N=CN=C3N)O)O	1
C09826	Pinobanksin	METPA1712	NA	C09826	NA	1
C05273	(2E)-Tetradecenoyl-CoA	HMDB0003946	5280767	C05273	CCCCCCCCCCC/C=C/C(=O)SCCNC(=O)CCNC(=O)C(C(C)(C)COP(=O)(O)OP(=O)(O)OC[C@@H]1[C@H]([C@H]([C@@H](O1)N2C=NC3=C2N=CN=C3N)O)OP(=O)(O)O)O	1
C03579	2beta-Hydroxygibberellin 1	METPA1641	NA	C03579	NA	1
C05859	Dehydrodolichol diphosphate	NA	8152	C05859	NA	1
C00647	Pyridoxamine 5'-phosphate	HMDB0001555	1053	C00647	CC1=NC=C(C(=C1O)CN)COP(=O)(O)O	1
C12128	(-)-Epiafzelechin	HMDB0030822	443639	C12128	C1[C@H]([C@H](OC2=CC(=CC(=C21)O)O)C3=CC=C(C=C3)O)O	1
C09320	Afzelechin	HMDB0030823	282014	C09320	C1C(C(OC2=CC(=CC(=C21)O)O)C3=CC=C(C=C3)O)O	1
C00774	Phloretin	HMDB0003306	4788	C00774	C1=CC(=CC=C1CCC(=O)C2=C(C=C(C=C2O)O)O)O	1
C00655	Xanthylic acid	HMDB0001554	73323	C00655	C1=NC2=C(N1[C@H]3[C@@H]([C@@H]([C@H](O3)COP(=O)(O)O)O)O)NC(=O)NC2=O	1
C10107	Myricetin	HMDB0002755	5281672	C10107	C1=C(C=C(C(=C1O)O)O)C2=C(C(=O)C3=C(C=C(C=C3O2)O)O)O	1
C01801	Deoxyribose	HMDB0003224	22833604	C01801	C1[C@H]([C@@H](O[C@@H]1O)CO)O	1
C04272	(R)-2,3-Dihydroxy-isovalerate	HMDB0012141	440279	C04272	CC(C)([C@H](C(=O)O)O)O	1
C00221	D-Glucose	HMDB0000122	5793	C00221	C([C@@H]1[C@H]([C@@H]([C@H](C(O1)O)O)O)O)O	1
C00267	Alpha-D-Glucose	HMDB0003345	79025	C00267	C([C@@H]1[C@H]([C@@H]([C@H]([C@H](O1)O)O)O)O)O	1
C00379	D-Xylitol	HMDB0002917	6912	C00379	C([C@H](C([C@H](CO)O)O)O)O	1
C00159	D-Mannose	HMDB0000169	18950	C00159	C([C@@H]1[C@H]([C@@H]([C@@H](C(O1)O)O)O)O)O	1
C00095	D-Fructose	NA	3395	C00095	NA	1
C00124	D-Galactose	NA	3424	C00124	NA	1
C00031	D-Glucose	HMDB0000122	5793	C00031	C([C@@H]1[C@H]([C@@H]([C@H](C(O1)O)O)O)O)O	1
C00137	myo-Inositol	HMDB0000211	NA	C00137	O[C@H]1[C@H](O)[C@@H](O)[C@H](O)[C@H](O)[C@@H]1O	1
C00984	D-Galactose	HMDB0000143	439357	C00984	C([C@@H]1[C@@H]([C@@H]([C@H]([C@H](O1)O)O)O)O)O	1
C01040	L-Gulonolactone	HMDB0003466	439373	C01040	C([C@@H]([C@@H]1[C@@H]([C@@H](C(=O)O1)O)O)O)O	1
C01115	L-Galactono-1,4-lactone	METPA0133	NA	C01115	NA	1
C01825	L-Galactose	HMDB0033704	6036	C01825	C([C@H]1[C@H]([C@H]([C@@H](C(O1)O)O)O)O)O	1
C00141	Alpha-ketoisovaleric acid	HMDB0000019	49	C00141	CC(C)C(=O)C(=O)O	1
C02336	D-Fructose	HMDB0000660	439709	C02336	C([C@@H]1[C@H]([C@@H]([C@](O1)(CO)O)O)O)O	1
C05399	Melibiitol	HMDB0006791	440655	C05399	C([C@@H]1[C@@H]([C@@H]([C@H]([C@H](O1)O)O)O)O)OC[C@@H]([C@H]([C@@H]([C@@H](CO)O)O)O)O	1
C08491	Jasmonic acid	HMDB0032797	5281166	C08491	CC/C=C\C[C@@H]1[C@H](CCC1=O)CC(=O)O	1
C11857	Gibberellin A12	METPA1650	NA	C11857	NA	1
C15514	8'-Hydroxyabscisate	METPA1680	NA	C15514	NA	1
C04454	5-Amino-6-(5'-phosphoribitylamino)uracil	HMDB0003841	333	C04454	C(C(C(C(COP(=O)(O)O)O)O)O)NC1=C(C(=O)NC(=O)N1)N	1
C11831	Divinylprotochlorophyllide	METPA1061	NA	C11831	NA	1
C16358	1-Methylxanthine	HMDB0010738	80220	C16358	CN1C(=O)C2=C(NC1=O)N=CN2	1
C16353	7-Methylxanthine	HMDB0001991	68374	C16353	CN1C=NC2=C1C(=O)NC(=O)N2	1
C02059	Vitamin K1	HMDB0003555	5280483	C02059	CC1=C(C(=O)C2=CC=CC=C2C1=O)C/C=C(\C)/CCCC(C)CCCC(C)CCCC(C)C	1
C15801	6-Deoxotyphasterol	METPA1211	NA	C15801	NA	1
C15799	6-Deoxoteasterone	METPA1209	NA	C15799	NA	1
C05909	Leucodelphinidin	METPA1713	NA	C05909	NA	1
C05911	Pentahydroxyflavanone	METPA1717	NA	C05911	NA	1
C01617	Taxifolin	METPA0191	NA	C01617	NA	1
C03170	Trypanothione disulfide	HMDB0060521	115098	C03170	[H][C@](N)(CCC(O)=N[C@@]1([H])CSSC[C@]([H])(N=C(O)CC[C@]([H])(N)C(O)=O)C(O)=NCC(O)=NCCCNCCCCN=C(O)CN=C1O)C(O)=O	1
C10287	4-[(E)-2-(3,5-dimethoxyphenyl)ethenyl]phenol	HMDB0130987	5281727	C10287	[H]\C(=C(\[H])C1=CC(OC)=CC(OC)=C1)C1=CC=C(O)C=C1	1
C04713	N6-(delta2-Isopentenyl)-adenosine 5'-monophosphate	METPA1686	NA	C04713	NA	1
C05401	Galactosylglycerol	HMDB0006790	656504	C05401	C([C@@H]1[C@@H]([C@@H]([C@H]([C@@H](O1)OCC(CO)O)O)O)O)O	1
C05634	5-Hydroxyindoleacetaldehyde	HMDB0004073	74688	C05634	C1=CC2=C(C=C1O)C(=CN2)CC=O	1
C00954	Indoleacetic acid	HMDB0000197	802	C00954	C1=CC=C2C(=C1)C(=CN2)CC(=O)O	1
C00859	Gibberellin A1	METPA0089	NA	C00859	NA	1
C06096	Gibberellin A29	METPA1656	NA	C06096	NA	1
C11868	Gibberellin A34	METPA1644	NA	C11868	NA	1
C01419	Cysteinylglycine	HMDB0000078	439498	C01419	C([C@@H](C(=O)NCC(=O)O)N)S	1
C02631	Isopropylmaleate	HMDB0012241	5280533	C02631	CC(C)/C(=C/C(=O)O)/C(=O)O	1
C02504	2-Isopropylmalic acid	HMDB0000402	5280523	C02504	CC(C)[C@@](CC(=O)O)(C(=O)O)O	1
C04411	3-Isopropylmalate	HMDB0012156	5462261	C04411	CC(C)[C@@H]([C@H](C(=O)O)O)C(=O)O	1
C03406	Argininosuccinic acid	HMDB0000052	16950	C03406	C(C[C@@H](C(=O)O)N)CN=C(N)N[C@@H](CC(=O)O)C(=O)O	1
C02029	Dihydrozeatin	HMDB0012215	439631	C02029	C[C@@H](CCNC1=NC=NC2=C1NC=N2)CO	1
C00909	Leukotriene A4	HMDB0001337	5280383	C00909	CCCCC/C=C\C/C=C\C=C\C=C\[C@H]1[C@@H](O1)CCCC(=O)O	1
C11875	ent-7alpha-Hydroxykaur-16-en-19-oic acid	METPA1652	NA	C11875	NA	1
C00089	Sucrose	HMDB0000258	5988	C00089	C([C@@H]1[C@H]([C@@H]([C@H]([C@H](O1)O[C@]2([C@H]([C@@H]([C@H](O2)CO)O)O)CO)O)O)O)O	1
C05402	Melibiose	HMDB0000048	440658	C05402	OC[C@H]1O[C@H](OC[C@H]2O[C@H](O)[C@H](O)[C@@H](O)[C@H]2O)[C@@H](O)[C@@H](O)[C@@H]1O	1
C05400	Isomaltose	HMDB0002923	440656	C05400	OC[C@H]1O[C@H](OC[C@H]2O[C@H](O)[C@H](O)[C@@H](O)[C@H]2O)[C@@H](O)[C@@H](O)[C@@H]1O	1
C01235	Beta-Cortol	HMDB0005821	246164	C01235	C[C@]12CC[C@H](C[C@H]1CC[C@@H]3[C@@H]2[C@H](C[C@]4([C@H]3CC[C@@]4([C@@H](CO)O)O)C)O)O	1
C00243	Alpha-Lactose	HMDB0000186	84571	C00243	C([C@@H]1[C@@H]([C@@H]([C@H]([C@@H](O1)O[C@@H]2[C@H](O[C@@H]([C@@H]([C@H]2O)O)O)CO)O)O)O)O	1
C00185	1-beta-D-Glucopyranosyl-4-D-glucopyranose	MA3TEM061	3485	C00185	C(CC=O)CC=O	1
C01083	Trehalose	HMDB0000975	7427	C01083	C([C@@H]1[C@H]([C@@H]([C@H]([C@H](O1)O[C@@H]2[C@@H]([C@H]([C@@H]([C@H](O2)CO)O)O)O)O)O)O)O	1
C00208	D-Maltose	HMDB0000163	10991489	C00208	C([C@@H]1[C@H]([C@@H]([C@H]([C@H](O1)O[C@@H]2[C@H](O[C@@H]([C@H]([C@H]2O)O)O)CO)O)O)O)O	1
C01079	Protoporphyrinogen IX	HMDB0001097	121893	C01079	CC1=C2CC3=C(C(=C(N3)CC4=C(C(=C(N4)CC5=C(C(=C(N5)CC(=C1CCC(=O)O)N2)CCC(=O)O)C)C=C)C)C=C)C	1
C00415	Dihydrofolic acid	HMDB0001056	98792	C00415	C1C(=NC2=C(N1)NC(=NC2=O)N)CNC3=CC=C(C=C3)C(=O)N[C@@H](CCC(=O)O)C(=O)O	1
C00341	Geranyl 2-methylbutyrate	HMDB0032291	6437648	C00341	CCC(C)C(=O)OC/C=C(\C)/CCC=C(C)C	1
C05404	D-Gal alpha 1->6D-Gal alpha 1->6D-Glucose	HMDB0060468	440660	C05404	OC[C@H]1O[C@H](OC[C@H]2O[C@H](OC[C@H]3OC(O)[C@H](O)[C@@H](O)[C@@H]3O)[C@H](O)[C@@H](O)[C@H]2O)[C@H](O)[C@@H](O)[C@H]1O	1
C00492	Raffinose	HMDB0003213	10542	C00492	C([C@@H]1[C@@H]([C@@H]([C@H](C(O1)OC[C@@H]2[C@H]([C@@H]([C@H](C(O2)O[C@]3([C@H]([C@@H]([C@H](O3)CO)O)O)CO)O)O)O)O)O)O)O	1
C00721	Dextrin	HMDB0006857	62698	C00721	C([C@@H]1[C@H]([C@@H]([C@H](C(O1)O[C@@H]2[C@H](OC([C@@H]([C@H]2O)O)O[C@@H]3[C@H](O[C@@H]([C@@H]([C@H]3O)O)O)CO)CO)O)O)O)O	1
C00255	Riboflavin	HMDB0000244	493570	C00255	CC1=CC2=C(C=C1C)N(C3=NC(=O)NC(=O)C3=N2)C[C@@H]([C@@H]([C@@H](CO)O)O)O	1
C00079	L-Phenylalanine	HMDB0000159	6140	C00079	C1=CC=C(C=C1)C[C@@H](C(=O)O)N	1
C01233	Glycerylphosphorylethanolamine	HMDB0000114	22833510	C01233	C(CO)N(CC(CO)O)P(=O)(O)O	1
C13482	Phosphodimethylethanolamine	HMDB0060244	151438	C13482	CN(C)CCOP(O)(O)=O	1
C00643	5-Hydroxy-L-tryptophan	HMDB0000472	144	C00643	C1=CC2=C(C=C1O)C(=CN2)CC(C(=O)O)N	1
C15976	2-Methyl-1-hydroxypropyl-ThPP	HMDB0006866	23724626	C15976	CC1=C(SC(=[N+]1CC2=CN=C(N=C2N)C)C(C(C)C)O)CCOP(=O)(O)OP(=O)(O)O	1
C06082	(S)-Abscisic acid	HMDB0035140	5702609	C06082	CC1=CC(=O)CC([C@]1(/C=C/C(=C/C(=O)O)/C)O)(C)C	1
C04677	AICAR	HMDB0001517	65110	C04677	C1=NC(=C(N1[C@H]2[C@@H]([C@@H]([C@H](O2)COP(=O)(O)O)O)O)N)C(=O)N	1
C19872	N-Formyl-4-amino-5-aminomethyl-2-methylpyrimidine	NA	135626338	C19872	NA	1
C17226	2-(6'-Methylthio)hexylmalic acid	METPA1770	NA	C17226	NA	1
C17227	3-(6'-Methylthio)hexylmalic acid	NA	96023635	C17227	NA	1
C00082	L-Tyrosine	HMDB0000158	6057	C00082	C1=CC(=CC=C1C[C@@H](C(=O)O)N)O	1
C02505	2-Phenylacetamide	HMDB0010715	7680	C02505	C1=CC=C(C=C1)CC(=O)N	1
C00018	Pyridoxal 5'-phosphate	HMDB0001491	1051	C00018	CC1=NC=C(C(=C1O)C=O)COP(=O)(O)O	1
C00483	Tyramine	HMDB0000306	5610	C00483	C1=CC(=CC=C1CCN)O	1
C01613	Stachyose	HMDB0003553	439531	C01613	C([C@@H]1[C@@H]([C@@H]([C@H]([C@H](O1)OC[C@@H]2[C@@H]([C@@H]([C@H]([C@H](O2)OC[C@@H]3[C@H]([C@@H]([C@H]([C@H](O3)O[C@]4([C@H]([C@@H]([C@H](O4)CO)O)O)CO)O)O)O)O)O)O)O)O)O)O	1
C18021	Pheophorbide a	METPA1634	NA	C18021	NA	1
C00294	Inosine	HMDB0000195	6021	C00294	C1=NC(=O)C2=C(N1)N(C=N2)[C@H]3[C@@H]([C@@H]([C@H](O3)CO)O)O	1
C01598	Melatonin	HMDB0001389	896	C01598	CC(=O)NCCC1=CNC2=C1C=C(C=C2)OC	1
C17267	S-Sulfanylglutathione	NA	96023674	C17267	NA	1
C00249	Palmitic acid	HMDB0000220	985	C00249	CCCCCCCCCCCCCCCC(=O)O	1
C00072	Ascorbate	NA	3372	C00072	NA	1
C01762	Xanthosine	HMDB0000299	64959	C01762	C1=NC2=C(N1[C@H]3[C@@H]([C@@H]([C@H](O3)CO)O)O)NC(=O)NC2=O	1
C00448	Farnesyl pyrophosphate	HMDB0000961	445713	C00448	CC(=CCC/C(=C/CC/C(=C/COP(=O)(O)OP(=O)(O)O)/C)/C)C	1
C05427	Phytyl diphosphate	NA	7791	C05427	NA	1
C00437	N-Acetylornithine	HMDB0003357	439232	C00437	CC(=O)N[C@@H](CCCN)C(=O)O	1
C00526	Deoxyuridine	HMDB0000012	13712	C00526	C1[C@@H]([C@H](O[C@H]1N2C=CC(=O)NC2=O)CO)O	1
C00921	7,8-Dihydropteroic acid	HMDB0001412	170	C00921	C1C(=NC2=C(N1)NC(=NC2=O)N)CNC3=CC=C(C=C3)C(=O)O	1
C16540	7(1)-Hydroxychlorophyllide a	NA	51090869	C16540	NA	1
C18156	Bacteriochlorophyllide b	MA3TEM077	96024373	C18156	CC1=C(C2=C(CCN[C@H]2C3=CNC(=O)C(=C3)Cl)C=C1)C	1
C09833	Sakuranetin	HMDB0030090	73571	C09833	COC1=CC(=C2C(=O)C[C@H](OC2=C1)C3=CC=C(C=C3)O)O	1
C05275	(2E)-Decenoyl-CoA	HMDB0003948	5280768	C05275	CCCCCCC/C=C/C(=O)SCCNC(=O)CCNC(=O)C(C(C)(C)COP(=O)(O)OP(=O)(O)OC[C@@H]1[C@H]([C@H]([C@@H](O1)N2C=NC3=C2N=CN=C3N)O)OP(=O)(O)O)O	1
C17214	2-(3'-Methylthio)propylmalic acid	METPA1767	NA	C17214	NA	1
C17215	3-(3'-Methylthio)propylmalic acid	NA	96023623	C17215	NA	1
C05933	N-(o)-Hydroxyarginine	HMDB0004224	440849	C05933	C(CC(C(=O)O)N)CN=C(N)NO	1
C00135	L-Histidine	HMDB0000177	6274	C00135	C1=C(NC=N1)C[C@@H](C(=O)O)N	1
C03479	Folinic acid	HMDB0001562	143	C03479	C1C(N(C2=C(N1)NC(=NC2=O)N)C=O)CNC3=CC=C(C=C3)C(=O)NC(CCC(=O)O)C(=O)O	1
C00234	10-Formyltetrahydrofolate	HMDB0000972	135450591	C00234	C1C(NC2=C(N1)NC(=NC2=O)N)CN(C=O)C3=CC=C(C=C3)C(=O)N[C@@H](CCC(=O)O)C(=O)O	1
C00843	(-)-Menthone	HMDB0035162	26447	C00843	C[C@@H]1CC[C@H](C(=O)C1)C(C)C	1
C11389	(R)-3,7-Dimethyl-1,6-octadien-3-ol	HMDB0036101	67179	C11389	CC(C)=CCC[C@](C)(O)C=C	1
C00081	Inosine triphosphate	HMDB0000189	8583	C00081	C1=NC(=O)C2=C(N1)N(C=N2)[C@H]3[C@@H]([C@@H]([C@H](O3)COP(=O)(O)OP(=O)(O)OP(=O)(O)O)O)O	1
C03722	Quinolinic acid	HMDB0000232	1066	C03722	C1=CC(=C(N=C1)C(=O)O)C(=O)O	1
C02514	3-Fumarylpyruvate	HMDB0060371	5280525	C02514	OC(=O)\C=C\C(=O)CC(=O)C(O)=O	1
C00279	D-Erythrose 4-phosphate	HMDB0001321	122357	C00279	C([C@H]([C@H](C=O)O)O)OP(=O)(O)O	1
C08334	Lotaustralin	HMDB0033865	4626626	C08334	CCC(C)(C#N)OC1C(C(C(C(O1)CO)O)O)O	1
C01262	Anserine	HMDB0000194	112072	C01262	CN1C=NC=C1C[C@@H](C(=O)O)NC(=O)CCN	1
C11855	Gibberellin A29-catabolite	METPA1827	NA	C11855	NA	1
C00253	Nicotinic acid	HMDB0001488	938	C00253	C1=CC(=CN=C1)C(=O)O	1
C00822	Dopaquinone	HMDB0001229	439316	C00822	C1=CC(=O)C(=O)C=C1C[C@@H](C(=O)O)N	1
C16448	Dihydrozeatin-O-glucoside	NA	47205744	C16448	NA	1
C05366	(+)-Pinoresinol	NA	7741	C05366	NA	1
C20455	(-)-Pinoresinol	NA	163312192	C20455	NA	1
C18218	16-Hydroxy hexadecanoic acid	HMDB0006294	7058075	C18218	C(CCCCCCCC(=O)[O-])CCCCCCCO	1
C11876	(ent-6alpha,7alpha)-6,7-Dihydroxy-16-kauren-19-oic acid	HMDB0036763	0	C11876	CC12CCCC(C)(C1C(O)C(O)C13CC(CCC21)C(=C)C3)C(O)=O	1
C03451	S-Lactoylglutathione	HMDB0001066	440018	C03451	C[C@H](C(=O)SC[C@@H](C(=O)NCC(=O)O)NC(=O)CC[C@@H](C(=O)O)N)O	1
C12138	Delphinidin 3-O-beta-D-glucoside	HMDB0037997	443650	C12138	OC[C@H]1O[C@@H](OC2=CC3=C(C=C(O)C=C3O)[O+]=C2C2=CC(O)=C(O)C(O)=C2)[C@H](O)[C@@H](O)[C@@H]1O	1
C10646	Lariciresinol	NA	12829	C10646	NA	1
C20454	(-)-Lariciresinol	NA	163312191	C20454	NA	1
C16430	trans-Zeatin riboside monophosphate	METPA1690	NA	C16430	NA	1
C00353	Geranylgeranyl-PP	HMDB0004486	447277	C00353	CC(=CCC/C(=C/CC/C(=C/CC/C(=C/COP(=O)(O)OP(=O)(O)O)/C)/C)/C)C	1
C06089	ent-Copalyl diphosphate	METPA0756	NA	C06089	NA	1
C05623	Quercetin 3-glucoside	HMDB0037362	5280804	C05623	OC[C@H]1O[C@@H](OC2=C(OC3=C(C(O)=CC(O)=C3)C2=O)C2=CC=C(O)C(O)=C2)[C@H](O)[C@@H](O)[C@@H]1O	1
C04785	13(S)-HPOT	METPA0543	NA	C04785	NA	1
C01226	12-OPDA	METPA0152	NA	C01226	NA	1
C16324	9,10-EOT	METPA1281	NA	C16324	NA	1
C20693	Carlactone	NA	172232413	C20693	NA	1
C01674	Chitobiose	HMDB0003556	22833609	C01674	CC(=O)N[C@@H]1[C@H]([C@@H]([C@H](O[C@H]1O)CO)O[C@H]2[C@@H]([C@H]([C@@H]([C@H](O2)CO)O)O)NC(=O)O)O	1
C00021	S-Adenosylhomocysteine	HMDB0000939	439155	C00021	C1=NC2=C(C(=N1)N)N=CN2[C@H]3[C@@H]([C@@H]([C@H](O3)CSCC[C@@H](C(=O)O)N)O)O	1
C00705	dCDP	HMDB0001245	150855	C00705	C1[C@@H]([C@H](O[C@H]1N2C=CC(=NC2=O)N)COP(=O)(O)OP(=O)(O)O)O	1
C02139	Chlorophyllide	METPA0252	NA	C02139	NA	1
C11829	13(1)-Hydroxy-magnesium-protoporphyrin IX 13-monomethyl ester	METPA1059	NA	C11829	NA	1
C05382	D-Sedoheptulose 7-phosphate	HMDB0001068	22833559	C05382	C([C@@H]1[C@H]([C@H]([C@@H](C(O1)(CO)O)O)O)O)OP(=O)(O)O	1
C05512	Deoxyinosine	HMDB0000071	65058	C05512	C1[C@@H]([C@H](O[C@H]1N2C=NC3=C2NC=NC3=O)CO)O	1
C21015	gamma-L-Glutamyl-L-2-aminobutyrate	NA	254741469	C21015	NA	1
C00164	Acetoacetic acid	HMDB0000060	96	C00164	CC(=O)CC(=O)O	1
C00232	Succinic acid semialdehyde	HMDB0001259	1112	C00232	C(CC(=O)O)C=O	1
C00188	L-Threonine	HMDB0000167	6288	C00188	C[C@H]([C@@H](C(=O)O)N)O	1
C00263	L-Homoserine	HMDB0000719	12647	C00263	C(CO)[C@@H](C(=O)O)N	1
C05519	L-Allothreonine	HMDB0004041	99289	C05519	C[C@@H]([C@@H](C(=O)O)N)O	1
C00109	2-Ketobutyric acid	HMDB0000005	58	C00109	CCC(=O)C(=O)O	1
C06002	(S)-Methylmalonic acid semialdehyde	HMDB0002217	5462303	C06002	C[C@@H](C=O)C(=O)O	1
C00349	2-Methyl-3-oxopropanoic acid	HMDB0001172	296	C00349	CC(C=O)C(=O)O	1
C00631	2-Phospho-D-glyceric acid	HMDB0003391	439278	C00631	C([C@H](C(=O)O)OP(=O)(O)O)O	1
C00197	3-Phosphoglyceric acid	HMDB0060180	439183	C00197	O[C@H](COP(O)(O)=O)C(O)=O	1
C00026	Oxoglutaric acid	HMDB0000208	51	C00026	C(CC(=O)O)C(=O)C(=O)O	1
C02226	Citraconic acid	HMDB0000634	643798	C02226	C/C(=C/C(=O)O)/C(=O)O	1
C06032	D-erythro-3-Methylmalate	METPA0739	NA	C06032	NA	1
C04236	2-Isopropyl-3-oxosuccinate	HMDB0012149	5462259	C04236	CC(C)[C@@H](C(=O)C(=O)O)C(=O)O	1
C00493	Shikimic acid	HMDB0003070	8742	C00493	C1[C@H]([C@@H]([C@@H](C=C1C(=O)O)O)O)O	1
C02630	2-Hydroxyglutarate	HMDB0059655	43	C02630	OC(CCC(O)=O)C(O)=O	1
C15545	cis-Zeatin	METPA1828	NA	C15545	NA	1
C21833	Kaempferol-3-O-rutinoside	NA		C21833	NA	1
C21854	Kaempferol 3-O-rhamnoside-7-O-glucoside	NA	NA	C21854	NA	1
C03160	2-Succinylbenzoyl-CoA	METPA0365	NA	C03160	NA	1
C01081	Thiamine monophosphate	HMDB0002666	3382778	C01081	CC1=C(SC=[N+]1CC2=CN=C(N=C2N)C)CCOP(=O)(O)[O-]	1
C02666	Coniferyl aldehyde	METPA0314	NA	C02666	NA	1
C01019	L-Fucose	HMDB0000174	25310	C01019	C[C@H]1[C@H]([C@H]([C@@H](C(O1)O)O)O)O	1
C00559	Deoxyadenosine	HMDB0000101	13730	C00559	C1[C@@H]([C@H](O[C@H]1N2C=NC3=C2N=CN=C3N)CO)O	1
C01909	Dethiobiotin	HMDB0003581	445027	C01909	C[C@H]1[C@H](NC(=O)N1)CCCCCC(=O)O	1
C02291	L-Cystathionine	HMDB0000099	439258	C02291	C(CSC[C@@H](C(=O)O)N)[C@@H](C(=O)O)N	1
C04732	5-Amino-6-ribitylamino uracil	HMDB0011106	221	C04732	C(C(C(C(CO)O)O)O)NC1=C(C(=O)NC(=O)N1)N	1
C00029	Uridine diphosphate glucose	HMDB0000286	53477679	C00029	C1=CN(C(=O)NC1=O)[C@@H]2[C@H]([C@H]([C@@H](O2)COP(=O)(O)OP(=O)(O)OC3[C@H]([C@@H]([C@H]([C@@H](O3)CO)O)O)O)O)O	1
C00052	Uridine diphosphategalactose	HMDB0000302	18068	C00052	C1=CN(C(=O)NC1=O)[C@H]2[C@@H]([C@@H]([C@H](O2)COP(=O)(O)OP(=O)(O)O[C@@H]3[C@@H]([C@H]([C@H]([C@H](O3)CO)O)O)O)O)O	1
C06429	Docosahexaenoic acid	HMDB0002183	445580	C06429	CC/C=C\C/C=C\C/C=C\C/C=C\C/C=C\C/C=C\CCC(=O)O	1
C01929	Histidinal	HMDB0012234	775	C01929	C1=C(NC=N1)CC(C=O)N	1
C01279	4-Amino-5-hydroxymethyl-2-methylpyrimidine	METPA0166	NA	C01279	NA	1
C00534	Pyridoxamine	HMDB0001431	1052	C00534	CC1=NC=C(C(=C1O)CN)CO	1
C00101	Tetrahydrofolic acid	HMDB0001846	5280320	C00101	C1C(NC2=C(N1)NC(=NC2=O)N)CNC3=CC=C(C=C3)C(=O)N[C@@H](CCC(=O)O)C(=O)O	1
C00445	5,10-Methenyltetrahydrofolic acid	HMDB0001354	644350	C00445	C1[C@@H]2CN(C=[N+]2C3=C(N1)NC(=NC3=O)N)C4=CC=C(C=C4)C(=O)N[C@@H](CCC(=O)O)C(=O)[O-]	1
C01571	Capric acid	HMDB0000511	2969	C01571	CCCCCCCCCC(=O)O	1
C15792	3-Dehydroteasterone	NA	47205117	C15792	NA	1
C05819	Menaquinol	HMDB0060487	5280839	C05819	CC(C)=CCC\C(C)=C\CC1=C(O)C2=CC=CC=C2C(O)=C1C	1
C05839	cis-beta-D-Glucosyl-2-hydroxycinnamate	HMDB0060077	5316113	C05839	OC[C@H]1O[C@@H](OC2=CC=CC=C2\C=C/C(O)=O)[C@H](O)[C@@H](O)[C@@H]1O	1
C00118	D-Glyceraldehyde 3-phosphate	HMDB0001112	729	C00118	C(C(C=O)O)OP(=O)(O)O	1
C00111	Dihydroxyacetone phosphate	HMDB0001473	668	C00111	C(C(=O)COP(=O)(O)O)O	1
C00499	Allantoic acid	HMDB0001209	203	C00499	C(C(=O)O)(NC(=O)N)NC(=O)N	1
C00864	Pantothenic acid	HMDB0000210	6613	C00864	CC(C)(CO)C(C(=O)NCCC(=O)O)O	1
C20121	trans,trans-Farnesyl phosphate	NA	135626581	C20121	NA	1
C00075	Uridine triphosphate	HMDB0000285	6133	C00075	C1=CN(C(=O)NC1=O)[C@H]2[C@@H]([C@@H]([C@H](O2)COP(=O)(O)OP(=O)(O)OP(=O)(O)O)O)O	1
C06055	O-Phospho-4-hydroxy-L-threonine	HMDB0006802	440901	C06055	C([C@H]([C@@H](C(=O)O)N)O)OP(=O)(O)O	1
C01300	2-Amino-4-hydroxy-6-hydroxymethyl-7,8-dihydropteridine	METPA0169	NA	C01300	NA	1
C01107	Mevalonic acid-5P	HMDB0001343	439400	C01107	C[C@@](CCOP(=O)(O)O)(CC(=O)O)O	1
C16322	9-Oxononanoic acid	METPA1279	NA	C16322	NA	1
C03090	5-Phosphoribosylamine	HMDB0001128	439905	C03090	C([C@@H]1[C@H]([C@H]([C@@H](O1)N)O)O)OP(=O)(O)O	1
C00143	5,10-Methylene-THF	HMDB0001533	439175	C00143	C1[C@@H]2CN(CN2C3=C(N1)NC(=NC3=O)N)C4=CC=C(C=C4)C(=O)NC(CCC(=O)O)C(=O)O	1
C00219	Arachidonic acid	HMDB0001043	444899	C00219	CCCCC/C=C\C/C=C\C/C=C\C/C=C\CCCC(=O)O	1
C21831	ent-2alpha,3alpha-Dihydroxyisokaurene	NA	NA	C21831	NA	1
C21562	Oryzalexin D	NA	336445200	C21562	NA	1
C21561	Oryzalexin E	NA	336445199	C21561	NA	1
C01250	N-Acetyl-L-glutamate 5-semialdehyde	HMDB0006488	192878	C01250	CC(=O)N[C@@H](CCC=O)C(=O)O	1
C01036	Maleylacetoacetic acid	HMDB0002052	5280398	C01036	C(C(=O)CC(=O)O)C(=O)/C=C\C(=O)O	1
C02035	Gibberellin A20	METPA0241	NA	C02035	NA	1
C11864	Gibberellin A4	METPA1645	NA	C11864	NA	1
C11865	Gibberellin A51	HMDB0035041	13964928	C11865	CC12CC(O)CC3(OC1=O)C1CCC4CC1(CC4=C)C(C23)C(O)=O	1
C00117	D-Ribose 5-phosphate	HMDB0001548	439167	C00117	C([C@@H]1[C@H]([C@H](C(O1)O)O)O)OP(=O)(O)O	1
C00199	D-Ribulose 5-phosphate	HMDB0000618	439184	C00199	C([C@H]([C@H](C(=O)CO)O)O)OP(=O)(O)O	1
C00620	Ribose 1-phosphate	HMDB0001489	439236	C00620	C([C@@H]1[C@H]([C@H]([C@H](O1)OP(=O)(O)O)O)O)O	1
C00231	Xylulose 5-phosphate	HMDB0000868	439190	C00231	C([C@H]([C@@H](C(=O)CO)O)O)OP(=O)(O)O	1
C01179	4-Hydroxyphenylpyruvic acid	HMDB0000707	979	C01179	C1=CC(=CC=C1CC(=O)C(=O)O)O	1
C05350	2-Hydroxy-3-(4-hydroxyphenyl)propenoic acid	HMDB0006915	636708	C05350	C1=CC(=CC=C1/C=C(/C(=O)O)\O)O	1
C03906	Beta-L-arabinose 1-phosphate	HMDB0012195	440160	C03906	C1[C@@H]([C@@H]([C@H]([C@H](O1)OP(=O)(O)O)O)O)O	1
C01197	Caffeate	NA	4422	C01197	NA	1
C11512	Methyl jasmonate	HMDB0036583	5367719	C11512	CC\C=C/C[C@@H]1[C@@H](CC(=O)OC)CCC1=O	1
C16311	12-Oxo-9(Z)-dodecenoic acid	METPA1275	NA	C16311	NA	1
C00423	trans-Cinnamate	NA	3713	C00423	NA	1
C05608	(E)-3-(4-Hydroxyphenyl)-2-propenal	HMDB0040986	641301	C05608	OC1=CC=C(\C=C\C=O)C=C1	1
G00093	NA	NA	NA	NA	NA	0
C04376	5'-Phosphoribosyl-N-formylglycinamide	HMDB0001308	16048611	C04376	C([C@@H]1[C@H]([C@H]([C@@H](O1)NC(=O)CNC=O)O)O)OP(=O)(O)O	1
C21016	Ophthalmic acid	HMDB0005765	7018721	C21016	CC[C@@H](C(=O)NCC(=O)O)NC(=O)CC[C@@H](C(=O)O)N	1
C00940	2-Keto-glutaramic acid	HMDB0001552	48	C00940	C(CC(=O)N)C(=O)C(=O)O	1
C05125	2-(a-Hydroxyethyl)thiamine diphosphate	HMDB0003904	440568	C05125	CC1=C(SC(=[N+]1CC2=CN=C(N=C2N)C)C(C)O)CCOP(=O)(O)OP(=O)(O)O	1
C04352	4-Phosphopantothenoylcysteine	HMDB0001117	440304	C04352	CC(C)(COP(=O)(O)O)[C@H](C(=O)NCCC(=O)N[C@@H](CS)C(=O)O)O	1
C05844	5-L-Glutamyl-taurine	HMDB0004195	68759	C05844	C(CC(=O)NCCS(=O)(=O)O)[C@@H](C(=O)O)N	1
C00561	Mandelonitrile	HMDB0060486	9548674	C00561	O[C@@H](C#N)C1=CC=CC=C1	1
C04350	(E)-4-Hydroxyphenylacetaldehyde oxime	NA	6999	C04350	NA	1
C15803	6alpha-Hydroxy-castasterone	METPA1213	NA	C15803	NA	1
C04752	2-Methyl-4-amino-5-hydroxymethylpyrimidine diphosphate	METPA0538	NA	C04752	NA	1
C00680	meso-2,6-Diaminoheptanedioate	HMDB0001370	99290	C00680	N[C@@H](CCC[C@H](N)C(O)=O)C(O)=O	1
C05638	5-Hydroxykynurenamine	HMDB0004076	164719	C05638	C1=CC(=C(C=C1O)C(=O)CCN)N	1
C05635	5-Hydroxyindoleacetic acid	HMDB0000763	1826	C05635	C1=CC2=C(C=C1O)C(=CN2)CC(=O)O	1
C00055	Cytidine monophosphate	HMDB0000095	8117	C00055	C1=CN(C(=O)N=C1N)[C@H]2[C@@H]([C@@H]([C@H](O2)COP(=O)(O)O)O)O	1
C00513	CDP-glycerol	HMDB0059599	439249	C00513	OCC(O)COP(O)(=O)OP(O)(=O)OC[C@H]1O[C@H]([C@H](O)[C@@H]1O)N1C=CC(=N)N=C1O	1
C00427	Prostaglandin H2	HMDB0001381	445049	C00427	CCCCC[C@@H](/C=C/[C@H]1[C@H]2C[C@@H]([C@@H]1C/C=C\CCCC(=O)O)OO2)O	1
C00584	Prostaglandin E2	HMDB0001220	5283116	C00584	CCCCC[C@@H](/C=C/[C@H]1[C@@H](CC(=O)[C@@H]1C/C=C\CCCC(=O)O)O)O	1
C00032	Heme	HMDB0003178	26945	C00032	CC1=C(CCC(O)=O)C2=CC3=[N+]4C(=CC5=C(C=C)C(C)=C6C=C7C(C=C)=C(C)C8=[N+]7[Fe@]4(N2C1=C8)N56)C(C)=C3CCC(O)=O	1
C00852	Chlorogenic acid	HMDB0003164	1794427	C00852	C1[C@H]([C@H]([C@@H](C[C@@]1(C(=O)O)O)OC(=O)/C=C/C2=CC(=C(C=C2)O)O)O)O	1
C03648	cis-3 and trans-2-Hexenyl propionate	HMDB0032322	440073	C03648	C1=CC(=CC=C1[C@@H]2[C@H]([C@H](C3=C(C=C(C=C3O2)O)O)O)O)O	1
C09727	Epicatechin	HMDB0001871	72276	C09727	C1[C@H]([C@H](OC2=CC(=CC(=C21)O)O)C3=CC(=C(C=C3)O)O)O	1
C06562	Catechin	HMDB0002780	9064	C06562	C1[C@@H]([C@H](OC2=CC(=CC(=C21)O)O)C3=CC(=C(C=C3)O)O)O	1
C00224	Adenosine phosphosulfate	HMDB0001003	10238	C00224	C1=NC2=C(C(=N1)N)N=CN2[C@H]3[C@@H]([C@@H]([C@H](O3)COP(=O)(O)OS(=O)(=O)O)O)O	1
C01182	D-Ribulose 1,5-bisphosphate	METPA0139	NA	C01182	NA	1
C05841	Nicotinate D-ribonucleoside	HMDB0006809	161234	C05841	C1=CC(=C[N+](=C1)[C@H]2[C@@H]([C@@H]([C@H](O2)CO)O)O)C(=O)O	1
C00078	L-Tryptophan	HMDB0000929	6305	C00078	C1=CC=C2C(=C1)C(=CN2)C[C@@H](C(=O)O)N	1
C17743	Bisdemethoxycurcumin	HMDB0002114	5315472	C17743	C1=CC(=CC=C1/C=C/C(=O)CC(=O)/C=C/C2=CC=C(C=C2)O)O	1
C03150	Nicotinamide riboside	HMDB0000855	439924	C03150	C1=CC(=C[N+](=C1)[C@H]2[C@@H]([C@@H]([C@H](O2)CO)O)O)C(=O)N	1
C04874	7,8-Dihydroneopterin	HMDB0002275	659	C04874	C1C(=NC2=C(N1)NC(=NC2=O)N)C(C(CO)O)O	1
C00140	N-Acetyl-D-glucosamine	HMDB0000215	439174	C00140	CC(=O)N[C@@H]1[C@H]([C@@H]([C@H](OC1O)CO)O)O	1
C20345	Isopentenyl phosphate	NA	163312083	C20345	NA	1
C00257	Gluconic acid	HMDB0000625	10690	C00257	C([C@H]([C@H]([C@@H]([C@H](C(=O)O)O)O)O)O)O	1
C00800	Gulonic acid	HMDB0003290	152304	C00800	C([C@H]([C@@H]([C@H]([C@H](C(=O)O)O)O)O)O)O	1
C01180	2-Oxo-4-methylthiobutanoic acid	HMDB0001553	473	C01180	CSCCC(=O)C(=O)O	1
C16541	Chlorophyllide b	MA3TEM075	51090870	C16541	CCOCCCC(=O)NC1=CC=CC=C1C2=NNC(=N2)C(C)C	1
C18155	bacteriochlorophyllide a	MA3TEM076	96024372	C18155	CC1=C(C=C2[C@H](NCCC2=C1)/C=C/C3=CC=NC=C3)C	1
C17222	2-(5'-Methylthio)pentylmalic acid	METPA1769	NA	C17222	NA	1
C17223	3-(5'-Methylthio)pentylmalic acid	NA	96023631	C17223	NA	1
C05913	(3Z)-Phytochromobilin	METPA0710	NA	C05913	NA	1
C00307	Citicoline	HMDB0001413	13804	C00307	C[N+](C)(C)CCOP(=O)([O-])OP(=O)(O)OC[C@@H]1[C@H]([C@H]([C@@H](O1)N2C=CC(=NC2=O)N)O)O	1
C05906	Leucocyanidin	METPA1714	NA	C05906	NA	1
C12136	(-)-Epigallocatechin	HMDB0038361	72277	C12136	O[C@@H]1CC2=C(O)C=C(O)C=C2O[C@@H]1C1=CC(O)=C(O)C(O)=C1	1
C12127	(+)-Gallocatechin	HMDB0038365	65084	C12127	O[C@H]1CC2=C(O)C=C(O)C=C2O[C@@H]1C1=CC(O)=C(O)C(O)=C1	1
C00322	Oxoadipic acid	HMDB0000225	71	C00322	C(CC(=O)C(=O)O)CC(=O)O	1
C06124	Sphingosine 1-phosphate	HMDB0000277	5353956	C06124	CCCCCCCCCCCCC/C=C/C(C(COP(=O)(O)O)N)O	1
C00461	Chitin	HMDB0003362	21252321	C00461	CC(=O)NC1[C@@H](OC([C@H]([C@@H]1O)COC[C@H]2C([C@H]([C@@H](C(O2)CO)O)O)NC(=O)C)CO)COC[C@H]3[C@@H](C([C@@H](OC3CO)O)NC(=O)C)O	1
C00828	Vitamin K2	HMDB0030017	5283547	C00828	CC1=C(C(=O)C2=CC=CC=C2C1=O)C/C=C(\C)/CC/C=C(\C)/CC/C=C(\C)/CC/C=C(\C)/CC/C=C(\C)/CCC=C(C)C	1
C11821	5-Hydroxyisourate	HMDB0030097	250388	C11821	C12=NC(=O)NC1(C(=O)NC(=O)N2)O	1
C12248	5-hydroxy-2-oxo-4-ureido-2,5-dihydro-1H-imidazole-5-carboxylate	HMDB0059663	443736	C12248	NC(=O)NC1=NC(=O)NC1(O)C(O)=O	1
C01344	dIDP	HMDB0003536	439488	C01344	C1[C@@H]([C@H](O[C@H]1N2C=NC3=C2NC=NC3=O)COP(=O)(O)OP(=O)(O)O)O	1
C00025	L-Glutamic acid	HMDB0000148	33032	C00025	C(CC(=O)O)[C@@H](C(=O)O)N	1
C00979	O-Acetylserine	HMDB0003011	99478	C00979	CC(=O)OC[C@@H](C(=O)O)N	1
C05938	L-4-Hydroxyglutamate semialdehyde	HMDB0006556	440851	C05938	C([C@H](C=O)O)[C@@H](C(=O)O)N	1
C00302	DL-Glutamate	HMDB0060475	611	C00302	NC(CCC(O)=O)C(O)=O	1
C03461	2-trans,6-trans-Farnesal	HMDB0060356	5280598	C03461	CC(C)=CCC\C(C)=C\CC\C(C)=C\C=O	1
C00500	Biliverdin	HMDB0001008	5353439	C00500	CC\1=C(/C(=C/C2=C(C(=C(N2)/C=C\3/C(=C(C(=O)N3)C)C=C)C)CCC(=O)O)/N/C1=C/C4=NC(=O)C(=C4C)C=C)CCC(=O)O	1
C05262	(S)-3-Hydroxydodecanoyl-CoA	HMDB0003936	440603	C05262	CCCCCCCCC[C@@H](CC(=O)SCCNC(=O)CCNC(=O)C(C(C)(C)COP(=O)(O)OP(=O)(O)OC[C@@H]1[C@H]([C@H]([C@@H](O1)N2C=NC3=C2N=CN=C3N)O)OP(=O)(O)O)O)O	1
C18015	Momilactone A	NA	96024235	C18015	NA	1
C16362	3,6,8-Trimethylallantoin	METPA1295	NA	C16362	NA	1
C17230	2-(7'-Methylthio)heptylmalic acid	METPA1771	NA	C17230	NA	1
C17231	3-(7'-Methylthio)heptylmalic acid	NA	96023639	C17231	NA	1
C16335	OPC4-CoA	HMDB0011113	53480659	C16335	CC/C=C\C[C@H]1C(CCC1=O)CCCC(=O)SCCNC(=O)CCNC(=O)[C@@H](C(C)(C)COP(=O)(O)OP(=O)(O)OC[C@@H]2[C@@H](C([C@@H](O2)N3C=NC4=C3N=CN=C4N)O)OP(=O)(O)O)O	1
C15546	Cis-zeatin-O-glucoside	HMDB0012203	6250	C15546	C/C(=C\CNC1=NC=NC2=C1NC=N2)/CO[C@@H]3[C@@H]([C@H]([C@@H]([C@H](O3)CO)O)O)O	1
C00077	Ornithine	HMDB0000214	6262	C00077	C(C[C@@H](C(=O)O)N)CN	1
C02034	Gibberellin A19	HMDB0036896	4632015	C02034	CC1(CCCC2(C=O)C3CCC4(O)CC3(CC4=C)C(C12)C(O)=O)C(O)=O	1
C11861	Gibberellin A124	HMDB0037103	0	C11861	[H][C@@]12C[C@H](O)[C@]3(O)C[C@]1(CC3=C)[C@@H](C(O)=O)[C@@]1([H])[C@@]22CCC[C@]1(C)C(=O)OC2	1
C18167	Secoisolariciresinol	HMDB0013692	65373	C18167	COC1=C(C=CC(=C1)C[C@@H](CO)[C@@H](CC2=CC(=C(C=C2)O)OC)CO)O	1
C20456	(+)-Secoisolariciresinol	NA	163312193	C20456	NA	1
C18022	Red chlorophyll catabolite	METPA1635	NA	C18022	NA	1
C04640	Phosphoribosylformylglycineamidine	HMDB0000999	440417	C04640	C([C@@H]1[C@H]([C@H]([C@@H](O1)N=C(CNC=O)N)O)O)OP(=O)(O)O	1
C01302	1-(2-Carboxyphenylamino)-1-deoxy-D-ribulose 5-phosphate	METPA0170	NA	C01302	NA	1
C04302	N-(5-Phospho-D-ribosyl)anthranilate	METPA0483	NA	C04302	NA	1
C05143	Dhurrin	HMDB0060471	161355	C05143	OC[C@H]1O[C@@H](O[C@H](C#N)C2=CC=C(O)C=C2)[C@H](O)[C@@H](O)[C@@H]1O	1
C00844	Prunasin	HMDB0034934	119033	C00844	C1=CC=C(C=C1)[C@H](C#N)O[C@H]2[C@@H]([C@H]([C@@H]([C@H](O2)CO)O)O)O	1
C09762	(2S)-Liquiritigenin	HMDB0029519	1889	C09762	C1C(OC2=C(C1=O)C=CC(=C2)O)C3=CC=C(C=C3)O	1
C09827	(S)-Pinocembrin	HMDB0030808	238782	C09827	C1C(OC2=CC(=CC(=C2C1=O)O)O)C3=CC=CC=C3	1
C16404	Pinocembrin chalcone	METPA1721	NA	C16404	NA	1
C08650	Isoliquiritigenin	HMDB0037316	638278	C08650	OC1=CC=C(\C=C\C(=O)C2=C(O)C=C(O)C=C2)C=C1	1
C07480	Theobromine	HMDB0002825	5429	C07480	CN1C=NC2=C1C(=O)NC(=O)N2C	1
C13747	Paraxanthine	HMDB0001860	4687	C13747	CN1C=NC2=C1C(=O)N(C(=O)N2)C	1
C05651	5-Hydroxykynurenine	HMDB0012819	440745	C05651	C1=CC(=C(C=C1O)C(=O)CC(C(=O)O)N)N	1
C11863	Gibberellin A9	METPA1064	NA	C11863	NA	1
C06081	Farnesol	HMDB0004305	445070	C06081	CC(=CCC/C(=C/CC/C(=C/CO)/C)/C)C	1
C01126	(2E,6E)-Farnesol	NA	4357	C01126	NA	1
C06118	4-(4-Deoxy-alpha-D-gluc-4-enuronosyl)-D-galacturonate	METPA0762	NA	C06118	NA	1
C06010	(S)-2-Acetolactate	HMDB0006855	440878	C06010	CC(=O)[C@@](C)(C(=O)O)O	1
C01159	2,3-Diphosphoglyceric acid	HMDB0001294	186004	C01159	C([C@H](C(=O)O)OP(=O)(O)O)OP(=O)(O)O	1
C00236	Glyceric acid 1,3-biphosphate	HMDB0001270	683	C00236	C(C(C(=O)OP(=O)(O)O)O)OP(=O)(O)O	1
C20700	(3E,7E)-4,8,12-Trimethyl-1,3,7,11-tridecatetraene	HMDB0034498	13941492	C20700	CC(C)=CCC\C(C)=C/CC\C(C)=C\C=C	1
C00212	Adenosine	HMDB0000050	60961	C00212	C1=NC2=C(C(=N1)N)N=CN2[C@H]3[C@@H]([C@@H]([C@H](O3)CO)O)O	1
C00330	Deoxyguanosine	HMDB0000085	187790	C00330	C1[C@@H]([C@H](O[C@H]1N2C=NC3=C2NC(=NC3=O)N)CO)O	1
C00588	Phosphorylcholine	HMDB0001565	8691	C00588	C[N+](C)(C)CCOP(=O)(O)O	1
C00337	4,5-Dihydroorotic acid	HMDB0000528	648	C00337	C1C(NC(=O)NC1=O)C(=O)O	1
C00106	Uracil	HMDB0000300	1174	C00106	C1=CNC(=O)NC1=O	1
C02090	Trypanothione	HMDB0060520	449517	C02090	N[C@@H](CCC(=O)N[C@@H](CS)C(=O)NCC(=O)NCCCCNCCCNC(=O)CNC(=O)[C@H](CS)NC(=O)CC[C@H](N)C(O)=O)C(O)=O	1
C06007	(R) 2,3-Dihydroxy-3-methylvalerate	HMDB0012140	448154	C06007	CC[C@](C)([C@H](C(=O)O)O)O	1
C00522	(R)-Pantoate	METPA0053	NA	C00522	NA	1
C00418	Mevalonic acid	HMDB0000227	449	C00418	CC(CCO)(CC(=O)O)O	1
C00233	Ketoleucine	HMDB0000695	70	C00233	CC(C)CC(=O)C(=O)O	1
C03232	Phosphohydroxypyruvic acid	HMDB0001024	105	C03232	C(C(=O)C(=O)O)OP(=O)(O)O	1
C02612	(R)-2-Methylmalate	METPA0308	NA	C02612	NA	1
C16911	Afzelin	NA	96023404	C16911	NA	1
C16426	Isopentenyladenosine-5'-diphosphate	METPA1687	NA	C16426	NA	1
C02576	Perillyl aldehyde	HMDB0003647	16441	C02576	CC(=C)C1CCC(=CC1)C=O	1
C05378	Fructose 1,6-bisphosphate	HMDB0001058	445557	C05378	C([C@@H]1[C@H]([C@@H](C(O1)(COP(=O)(O)O)O)O)O)OP(=O)(O)O	1
C00665	D-Fructose 2,6-bisphosphate	HMDB0001047	105021	C00665	C([C@@H]1[C@H]([C@@H]([C@](O1)(CO)OP(=O)(O)O)O)O)OP(=O)(O)O	1
C03785	D-Tagatose 1,6-bisphosphate	HMDB0006872	440117	C03785	C([C@@H]1[C@@H]([C@@H](C(O1)(COP(=O)(O)O)O)O)O)OP(=O)(O)O	1
C01220	1D-Myo-inositol 1,4-bisphosphate	HMDB0000968	NA	C01220	O[C@H]1[C@@H](O)[C@@H](OP(O)(O)=O)[C@H](O)[C@@H](O)[C@@H]1OP(O)(O)=O	1
C04063	1D-Myo-inositol 3,4-bisphosphate	HMDB0006235	440211	C04063	[C@@H]1([C@@H]([C@@H]([C@@H]([C@H]([C@@H]1O)OP(=O)(O)O)OP(=O)(O)O)O)O)O	1
C00354	Fructose 1,6-bisphosphate	HMDB0001058	445557	C00354	C([C@@H]1[C@H]([C@@H](C(O1)(COP(=O)(O)O)O)O)O)OP(=O)(O)O	1
C00064	L-Glutamine	HMDB0000641	5961	C00064	C(CC(=O)N)[C@@H](C(=O)O)N	1
C21029	(R)-3-Ureidoisobutyrate	NA	254816254	C21029	NA	1
C11860	Gibberellin A15 open lactone	METPA1648	NA	C11860	NA	1
C06094	Gibberellin A53	HMDB0036895	5253706	C06094	CC12CCCC(C)(C1C(C(O)=O)C13CC(=C)C(O)(C1)CCC23)C(O)=O	1
C01267	Imidazole acetol-phosphate	HMDB0012236	792	C01267	C1=C(NC=N1)CC(=O)COP(=O)(O)O	1
C00438	Ureidosuccinic acid	HMDB0000828	93072	C00438	C([C@@H](C(=O)O)NC(=O)N)C(=O)O	1
C01061	4-Fumarylacetoacetic acid	HMDB0001268	5280398	C01061	C(C(=O)CC(=O)O)C(=O)/C=C/C(=O)O	1
C11355	4-Amino-4-deoxychorismate	METPA0993	NA	C11355	NA	1
C00130	Inosinic acid	HMDB0000175	8582	C00130	C1=NC(=O)C2=C(N1)N(C=N2)[C@H]3[C@@H]([C@@H]([C@H](O3)COP(=O)(O)O)O)O	1
C06196	dIMP	HMDB0006555	91531	C06196	C1[C@@H]([C@H](O[C@H]1N2C=NC3=C2NC=NC3=O)COP(=O)(O)O)O	1
C05903	Kaempferol	HMDB0005801	5280863	C05903	C1=CC(=CC=C1C2=C(C(=O)C3=C(C=C(C=C3O2)O)O)O)O	1
C01514	Luteolin	HMDB0005800	5280445	C01514	C1=CC(=C(C=C1C2=CC(=O)C3=C(C=C(C=C3O2)O)O)O)O	1
C05699	Selenocystathionine	HMDB0006343	98223	C05699	C(C[Se]CC(C(=O)O)N)C(C(=O)O)N	1
C00885	Isochorismate	METPA0094	NA	C00885	NA	1
C00491	L-Cystine	HMDB0000192	67678	C00491	C([C@@H](C(=O)O)N)SSC[C@@H](C(=O)O)N	1
C00073	L-Methionine	HMDB0000696	6137	C00073	CSCC[C@@H](C(=O)O)N	1
C00440	5-Methyltetrahydrofolic acid	HMDB0001396	439234	C00440	CN1C(CNC2=C1C(=O)N=C(N2)N)CNC3=CC=C(C=C3)C(=O)N[C@H](CCC(=O)O)C(=O)O	1
C22116	3beta-Hydroxy-4beta,14alpha-dimethyl-9beta,19-cyclo-5alpha-ergost-24(24(1))-en-4alpha-carboxylate	NA	NA	C22116	NA	1
C01149	4-Trimethylammoniobutanal	HMDB0001345	133	C01149	C[N+](C)(C)CCCC=O	1
C00179	Agmatine	HMDB0001432	199	C00179	C(CCN=C(N)N)CN	1
C06090	ent-Kaurene	METPA0757	NA	C06090	NA	1
C20145	ent-Isokaurene	NA	135626605	C20145	NA	1
C18225	9beta-Pimara-7,15-diene	NA	103061407	C18225	NA	1
C18226	ent-Cassa-12,15-diene	NA	103061408	C18226	NA	1
C18224	Stemod-13(17)-ene	NA	103061406	C18224	NA	1
C11877	(+)-Sandaracopimaradiene	NA	14039	C11877	NA	1
C18228	ent-Pimara-8(14),15-diene	NA	103061410	C18228	NA	1
C18223	Stemar-13-ene	NA	103061405	C18223	NA	1
C20185	(12E)-9alpha-Labda-8(17),12,14-triene	NA	163311928	C20185	NA	1
C00882	Dephospho-CoA	HMDB0001373	439335	C00882	CC(C)(COP(=O)(O)OP(=O)(O)OC[C@@H]1[C@H]([C@H]([C@@H](O1)N2C=NC3=C2N=CN=C3N)O)O)C(C(=O)NCCC(=O)NCCS)O	1
C02985	Fucose 1-phosphate	HMDB0001265	439871	C02985	C[C@H]1[C@H]([C@H]([C@@H](C(O1)OP(=O)(O)O)O)O)O	1
C03582	Resveratrol	HMDB0003747	445154	C03582	C1=CC(=CC=C1/C=C/C2=CC(=CC(=C2)O)O)O	1
C09751	(2R,3R)-3,4',7-Trihydroxyflavanone	HMDB0037254	3512634	C09751	OC1C(OC2=CC(O)=CC=C2C1=O)C1=CC=C(O)C=C1	1
C00509	Naringenin	HMDB0002670	439246	C00509	C1[C@H](OC2=CC(=CC(=C2C1=O)O)O)C3=CC=C(C=C3)O	1
C09614	Butin	METPA1718	NA	C09614	NA	1
C06561	Chalconaringenin	HMDB0029631	5280960	C06561	C1=CC(=CC=C1/C=C/C(=O)C2=C(C=C(C=C2O)O)O)O	1
C08578	Butein	METPA1722	NA	C08578	NA	1
C05332	Phenylethylamine	HMDB0012275	1001	C05332	C1=CC=C(C=C1)CCN	1
C17621	10-Hydroxygeraniol	METPA1453	NA	C17621	NA	1
C01185	Nicotinic acid mononucleotide	HMDB0001132	53477721	C01185	C1C(C=CC=[N+]1[C@H]2[C@@H]([C@@H]([C@H](O2)COP(=O)(O)[O-])O)O)C(=O)O	1
C05625	Rutin	HMDB0003249	5280805	C05625	C[C@H]1[C@@H]([C@H]([C@H]([C@@H](O1)OC[C@@H]2[C@H]([C@@H]([C@H]([C@@H](O2)OC3=C(OC4=CC(=CC(=C4C3=O)O)O)C5=CC(=C(C=C5)O)O)O)O)O)O)O)O	1
C19796	Quercetin 3-O-rhamnoside 7-O-glucoside	NA	135626263	C19796	NA	1
C02934	3-Dehydrosphinganine	HMDB0001480	439853	C02934	CCCCCCCCCCCCCCCC(=O)[C@H](CO)N	1
C00319	Sphingosine	HMDB0000252	5353955	C00319	CCCCCCCCCCCCC/C=C/C(C(CO)N)O	1
C15532	N-a-Acetylcitrulline	HMDB0000856	11506771	C15532	CC(=O)NC(CCCNC(=O)N)C(=O)O	1
C05335	Selenomethionine	HMDB0003966	15103	C05335	C[Se]CCC(C(=O)O)N	1
C15650	2,3-Diketo-5-methylthiopentyl-1-phosphate	METPA1194	NA	C15650	NA	1
C03492	D-4'-Phosphopantothenate	HMDB0001016	131	C03492	CC(C)(COP(=O)(O)O)C(C(=O)NCCC(=O)O)O	1
C00378	Thiamine	HMDB0000235	1130	C00378	CC1=C(SC=[N+]1CC2=CN=C(N=C2N)C)CCO	1
C02637	3-Dehydroshikimate	METPA0312	NA	C02637	NA	1
C00463	Indole	HMDB0000738	798	C00463	C1=CC=C2C(=C1)C=CN2	1
C04133	N-Acetyl-L-glutamyl 5-phosphate	HMDB0006456	440236	C04133	CC(=O)N[C@@H](CCC(=O)OP(=O)(O)O)C(=O)O	1
C00352	Glucosamine 6-phosphate	HMDB0001254	439217	C00352	C([C@@H]1[C@H]([C@@H]([C@H]([C@H](O1)O)N)O)O)OP(=O)(O)O	1
C04332	6,7-Dimethyl-8-(1-D-ribityl)lumazine	HMDB0003826	672	C04332	CC1=C(N(C2=NC(=O)NC(=O)C2=N1)CC(C(C(CO)O)O)O)C	1
C00387	Guanosine	HMDB0000133	6802	C00387	C1=NC2=C(N1[C@H]3[C@@H]([C@@H]([C@H](O3)CO)O)O)NC(=NC2=O)N	1
C00346	O-Phosphoethanolamine	HMDB0000224	1015	C00346	C(COP(=O)(O)O)N	1
C01024	Hydroxymethylbilane	HMDB0001137	788	C01024	C1=C(C(=C(N1)CC2=C(C(=C(N2)CC3=C(C(=C(N3)CC4=C(C(=C(N4)CO)CC(=O)O)CCC(=O)O)CC(=O)O)CCC(=O)O)CC(=O)O)CCC(=O)O)CC(=O)O)CCC(=O)O	1
C15802	6-Deoxocastasterone	HMDB0033984	13870433	C15802	C[C@@H]([C@H]1CC[C@@H]2[C@@]1(CC[C@H]3[C@H]2CC[C@@H]4[C@@]3(C[C@H]([C@H](C4)O)O)C)C)[C@H]([C@@H]([C@@H](C)C(C)C)O)O	1
C06001	(S)-3-Hydroxyisobutyric acid	HMDB0000023	87	C06001	C[C@@H](CO)C(=O)O	1
C05984	2-Hydroxybutyric acid	HMDB0000008	11266	C05984	CCC(C(=O)O)O	1
C08362	Palmitoleic acid	HMDB0003229	5312427	C08362	CCCCCC/C=C\CCCCCCCC(=O)O	1
C01103	Orotidylic acid	HMDB0000218	160617	C01103	C1=C(N(C(=O)NC1=O)[C@H]2[C@@H]([C@@H]([C@H](O2)COP(=O)(O)O)O)O)C(=O)O	1
C00459	Thymidine 5'-triphosphate	HMDB0001342	64968	C00459	CC1=CN(C(=O)NC1=O)[C@H]2C[C@@H]([C@H](O2)COP(=O)(O)OP(=O)(O)OP(=O)(O)O)O	1
C00099	Beta-Alanine	HMDB0000056	239	C00099	C(CN)C(=O)O	1
C00041	L-Alanine	HMDB0000161	5950	C00041	C[C@@H](C(=O)O)N	1
C00213	Sarcosine	HMDB0000271	1088	C00213	CNCC(=O)O	1
C01401	(alpha-D-mannosyl)7-beta-D-mannosyl-diacetylchitobiosyl-L-asparagine, isoform A (protein)	HMDB0062251	602	C01401	CC(N)C(O)=O	1
C06056	4-Hydroxy-L-threonine	METPA0747	NA	C06056	NA	1
C05674	CMP-N-trimethyl-2-aminoethylphosphonate	HMDB0060072	440755	C05674	C[N+](C)(C)CCP(O)(=O)OP(O)(=O)OC[C@H]1O[C@H]([C@H](O)[C@@H]1O)N1C=CC(=N)N=C1O	1
C06054	2-Oxo-3-hydroxy-4-phosphobutanoic acid	HMDB0006801	21145142	C06054	C([C@H](C(=O)C(=O)O)O)OP(=O)(O)O	1
C01165	L-Glutamic gamma-semialdehyde	HMDB0002104	193305	C01165	C(C[C@@H](C(=O)O)N)C=O	1
C01157	4-Hydroxyproline	HMDB0000725	5810	C01157	C1[C@H](CN[C@@H]1C(=O)O)O	1
C00430	5-Aminolevulinic acid	HMDB0001149	137	C00430	C(CC(=O)O)C(=O)CN	1
C03741	(S)-4-Amino-5-oxopentanoate	METPA0432	NA	C03741	NA	1
C00627	Pyridoxine 5'-phosphate	HMDB0001319	1055	C00627	CC1=NC=C(C(=C1O)CO)COP(=O)(O)O	1
C13453	Xanthoxin	HMDB0014693	586193	C13453	COC1=C2OC(=O)C=CC2=CC2=C1OC=C2	1
C05698	Selenohomocysteine	HMDB0004119	440763	C05698	C(C[SeH])C(C(=O)O)N	1
C00475	Cytidine	HMDB0000089	6253	C00475	C1=CN(C(=O)N=C1N)[C@H]2[C@@H]([C@@H]([C@H](O2)CO)O)O	1
C05711	gamma-Glutamyl-beta-cyanoalanine	HMDB0060478	53297342	C05711	N[C@@H](CCC(O)=N[C@@H](CC#N)C(O)=O)C(O)=O	1
C05951	Leukotriene D4	HMDB0003080	6435286	C05951	CCCCC/C=C\C/C=C\C=C\C=C\[C@H]([C@H](CCCC(=O)O)O)SCC(C(=O)NCC(=O)O)N	1
C12455	5-Aminopentanal	HMDB0012815	443849	C12455	C(CCN)CC=O	1
C00621	Dolichyl diphosphate	HMDB0001513	5462166	C00621	CC/C(=C/CCCC(C)CCOP(=O)(O)OP(=O)(O)O)/C	1
C00329	Glucosamine	HMDB0001514	439213	C00329	C([C@@H]1[C@H]([C@@H]([C@H](C(O1)O)N)O)O)O	1
C00407	L-Isoleucine	HMDB0000172	6306	C00407	CC[C@H](C)[C@@H](C(=O)O)N	1
C00123	L-Leucine	HMDB0000687	6106	C00123	CC(C)C[C@@H](C(=O)O)N	1
C15672	Heme O	HMDB0001162	0	C15672	CC(C)=CCC\C(C)=C\CC\C(C)=C\CCC(O)C1=C(C)/C2=C/C3=N/C(=C\C4=C(CCC(O)=O)C(C)=C5/C=C6\N=C(\C=C\1/N\2[Fe]N45)C(C)=C6C=C)/C(CCC(O)=O)=C3C	1
C08492	(E)-3-Hexen-1-ol	HMDB0030003	5281167	C08492	CC/C=C\CCO	1
C03242	8,11,14-Eicosatrienoic acid	HMDB0002925	5280581	C03242	CCCCC/C=C\C/C=C\C/C=C\CCCCCCC(=O)O	1
C16688	Sucrose-6-phosphate	METPA1419	NA	C16688	NA	1
C02591	Sucrose 6-phosphate	METPA0307	NA	C02591	NA	1
C00689	Trehalose 6-phosphate	HMDB0001124	122336	C00689	C([C@@H]1[C@H]([C@@H]([C@H]([C@H](O1)O[C@@H]2[C@@H]([C@H]([C@@H]([C@H](O2)COP(=O)(O)O)O)O)O)O)O)O)O	1
C00760	Galabiose	HMDB0029902	53477911	C00760	OCC1OC(OC2C(O)C(O)C(O)OC2CO)C(O)C(O)C1O	1
C12206	Caffeyl alcohol	METPA1708	NA	C12206	NA	1
C00295	Orotic acid	HMDB0000226	967	C00295	C1=C(NC(=O)NC1=O)C(=O)O	1
C00989	Gamma Hydroxybutyric Acid	HMDB0015507	3037032	C00989	C(CC(=O)[O-])CO	1
C00047	L-Lysine	HMDB0000182	5962	C00047	C(CCN)C[C@@H](C(=O)O)N	1
C03373	5-Aminoimidazole ribonucleotide	HMDB0001235	161500	C03373	C1=C(N(C=N1)[C@H]2[C@@H]([C@@H]([C@H](O2)COP(=O)(O)O)O)O)N	1
C00051	Glutathione	HMDB0062697	745	C00051	NC(CCC(O)=NC(CS)C(O)=NCC(O)=O)C(O)=O	1
C00327	Citrulline	HMDB0000904	9750	C00327	C(C[C@@H](C(=O)O)N)CNC(=O)N	1
C00129	Isopentenyl pyrophosphate	HMDB0001347	1195	C00129	CC(=C)CCOP(=O)(O)OP(=O)(O)O	1
C00235	Dimethylallylpyrophosphate	HMDB0001120	647	C00235	CC(=CCOP(=O)(O)OP(=O)(O)O)C	1
C06459	Phosphorylcholine	HMDB0001565	8691	C06459	C[N+](C)(C)CCOP(O)(O)=O	1
C11811	1-Hydroxy-2-methyl-2-butenyl 4-diphosphate	METPA1056	NA	C11811	NA	1
C00093	Glycerol 3-phosphate	HMDB0000126	439162	C00093	C([C@H](COP(=O)(O)O)O)O	1
C00049	L-Aspartic acid	HMDB0000191	5960	C00049	C([C@@H](C(=O)O)N)C(=O)O	1
C05130	Imidazole-4-acetaldehyde	HMDB0003905	150841	C05130	C1=C(NC=N1)CC=O	1
C00458	dCTP	HMDB0000998	65091	C00458	C1[C@@H]([C@H](O[C@H]1N2C=CC(=NC2=O)N)COP(=O)(O)OP(=O)(O)OP(=O)(O)O)O	1
C01246	Dolichyl b-D-glucosyl phosphate	HMDB0001054	22833557	C01246	CC(CC/C=C(/C)\CCC=C(C)C)CCOP(=O)(O)O[C@H]1[C@@H]([C@H]([C@@H]([C@H](O1)CO)O)O)O	1
C01268	5-Amino-6-(5'-phosphoribosylamino)uracil	METPA0159	NA	C01268	NA	1
C05276	(2E)-Octenoyl-CoA	HMDB0003949	5280769	C05276	CCCCC/C=C/C(=O)SCCNC(=O)CCNC(=O)C(C(C)(C)COP(=O)(O)OP(=O)(O)OC[C@@H]1[C@H]([C@H]([C@@H](O1)N2C=NC3=C2N=CN=C3N)O)OP(=O)(O)O)O	1
C15670	Chenodeoxyglycocholoyl-CoA	HMDB0006897	440685	C15670	CC(CCC(=O)SCCNC(=O)CCNC(=O)C(C(C)(C)COP(=O)(O)OP(=O)(O)OC[C@@H]1[C@H]([C@H]([C@@H](O1)N2C=NC3=C2N=CN=C3N)O)OP(=O)(O)O)O)C4CCC5[C@@]4(CCC6C5[C@@H](C[C@H]7[C@@]6(CC[C@H](C7)O)C)O)C	1
C16360	3,7-Dimethyluric acid	HMDB0001982	83126	C16360	CN1C2=C(NC1=O)N(C(=O)NC2=O)C	1
C16356	1,7-Dimethyluric acid	HMDB0011103	91611	C16356	CN1C2=C(NC1=O)NC(=O)N(C2=O)C	1
C00148	L-Proline	HMDB0000162	145742	C00148	C1C[C@H](NC1)C(=O)O	1
C00504	Folic acid	HMDB0000121	6037	C00504	C1=CC(=CC=C1C(=O)N[C@@H](CCC(=O)O)C(=O)O)NCC2=CN=C3C(=N2)C(=O)N=C(N3)N	1
C05265	3-Oxodecanoyl-CoA	HMDB0003939	440606	C05265	CCCCCCCC(=O)CC(=O)SCCNC(=O)CCNC(=O)C(C(C)(C)COP(=O)(O)OP(=O)(O)OC[C@@H]1[C@H]([C@H]([C@@H](O1)N2C=NC3=C2N=CN=C3N)O)OP(=O)(O)O)O	1
C11947	3-Hydroxy-2,6-dimethyl-5-methylene-heptanoyl-CoA	HMDB0004601	9543313	C11947	CC(C)C(=C)CC(C(C)C(=O)SCCNC(=O)CCNC(=O)[C@@H](C(C)(C)COP(=O)(O)OP(=O)(O)OC[C@@H]1[C@H]([C@H]([C@@H](O1)N2C=NC3=C2N=CN=C3N)O)OP(=O)(O)O)O)O	1
C00120	Biotin	HMDB0000030	171548	C00120	C1[C@H]2[C@@H]([C@@H](S1)CCCCC(=O)O)NC(=O)N2	1
C00666	Diaminopimelic acid	HMDB0001370	99290	C00666	C(C[C@@H](C(=O)O)N)C[C@@H](C(=O)O)N	1
C00632	3-Hydroxyanthranilic acid	HMDB0001476	86	C00632	C1=CC(=C(C(=C1)O)N)C(=O)O	1
C04556	4-Amino-2-methyl-5-phosphomethylpyrimidine	METPA0511	NA	C04556	NA	1
C16424	Isopentenyladenosine-5'-triphosphate	METPA1300	NA	C16424	NA	1
C16428	trans-Zeatin riboside triphosphate	METPA1301	NA	C16428	NA	1
C00794	Sorbitol	HMDB0000247	5780	C00794	C([C@H]([C@H]([C@@H]([C@H](CO)O)O)O)O)O	1
C00944	3-Dehydroquinate	HMDB0012710	439351	C00944	C1[C@H]([C@@H](C(=O)C[C@]1(C(=O)O)O)O)O	1
C17218	2-(4'-Methylthio)butylmalic acid	METPA1768	NA	C17218	NA	1
C17219	3-(4'-Methylthio)butylmalic acid	NA	96023627	C17219	NA	1
C01041	Ascorbic acid	HMDB0000044	54670067	C01041	C([C@@H]([C@@H]1C(=C(C(=O)O1)O)O)O)O	1
C02670	D-Glucurono-6,3-lactone	HMDB0006355	439782	C02670	[C@H]1([C@@H]2[C@@H]([C@H](C(=O)O2)O)O[C@H]1O)O	1
C03289	L-xylo-Hexulonolactone	METPA0381	NA	C03289	NA	1
C00366	Uric acid	HMDB0000289	1175	C00366	C12=C(NC(=O)N1)NC(=O)NC2=O	1
C05610	Sinapoyl aldehyde	METPA0625	NA	C05610	NA	1
C00590	Coniferyl alcohol	HMDB0012915	1549095	C00590	COC1=C(C=CC(=C1)/C=C/CO)O	1
G00019	(GlcNAc)5 (Man)3 (Asn)1	METPA1486	NA	G00019	NA	1
C00544	Homogentisic acid	HMDB0000130	780	C00544	C1=CC(=C(C=C1O)CC(=O)O)O	1
C05577	3,4-Dihydroxymandelaldehyde	HMDB0006242	151725	C05577	C1=CC(=C(C=C1C(C=O)O)O)O	1
C05778	Sirohydrochlorin	METPA0681	NA	C05778	NA	1
C04181	3-Hydroxy-3-methyl-2-oxobutanoic acid	METPA0472	NA	C04181	NA	1
C00978	N-Acetylserotonin	HMDB0001238	903	C00978	CC(=O)NCCC1=CNC2=C1C=C(C=C2)O	1
C01137	S-Adenosylmethioninamine	HMDB0000988	439415	C01137	C[S+](CCCN)C[C@@H]1[C@H]([C@H]([C@@H](O1)N2C=NC3=C2N=CN=C3N)O)O	1
C00206	dADP	HMDB0001508	53477733	C00206	C1[C@@H]([C@H](OC1N2C=NC3=C2N=CN=C3N)COP(=O)(O)OP(=O)(O)O)O	1
C00003	NAD	HMDB0000902	5893	C00003	C1=CC(=C[N+](=C1)[C@H]2[C@@H]([C@@H]([C@H](O2)COP(=O)(O)OP(=O)(O)OC[C@@H]3[C@H]([C@H]([C@@H](O3)N4C=NC5=C4N=CN=C5N)O)O)O)O)C(=O)N	1
C04327	4-Methyl-5-(2-phosphoethyl)-thiazole	METPA0487	NA	C04327	NA	1
C16339	(+)-7-Isojasmonic acid CoA	HMDB0060298	71448920	C16339	CC\C=C/C[C@H]1[C@@H](CC(=O)SCCN=C(O)CCN=C(O)[C@H](O)C(C)(C)COP(O)(=O)OP(O)(=O)OC[C@H]2O[C@H]([C@H](O)[C@@H]2OP(O)(O)=O)N2C=NC3=C(N)N=CN=C23)CCC1=O	1
C02642	Ureidopropionic acid	HMDB0000026	111	C02642	C(CNC(=O)N)C(=O)O	1
C00152	L-Asparagine	HMDB0000168	6267	C00152	C([C@@H](C(=O)O)N)C(=O)N	1
C12137	Pelargonidin 3-O-glucoside	METPA1087	NA	C12137	NA	1
C00214	Thymidine	HMDB0000273	5789	C00214	CC1=CN(C(=O)NC1=O)[C@H]2C[C@@H]([C@H](O2)CO)O	1
C01962	Thiocysteine	HMDB0003585	439614	C01962	C([C@H](C(=O)O)N)SS	1
C02362	2-Oxosuccinamic acid	HMDB0060350	439716	C02362	OC(=N)CC(=O)C(O)=O	1
C05840	Iminoaspartic acid	HMDB0001131	796	C05840	C(C(=N)C(=O)O)C(=O)O	1
C00637	Indoleacetaldehyde	HMDB0001190	800	C00637	C1=CC=C2C(=C1)C(=CN2)CC=O	1
C00178	Thymine	HMDB0000262	1135	C00178	CC1=CNC(=O)NC1=O	1
C02835	Imidazoleacetic acid	HMDB0002024	96215	C02835	C1=C(NC=N1)CC(=O)O	1
C00624	N-Acetylglutamic acid	HMDB0001138	185	C00624	CC(=O)NC(CCC(=O)O)C(=O)O	1
C03972	Tetrahydrodipicolinate	HMDB0012289	632	C03972	C1CC(N=C(C1)C(=O)O)C(=O)O	1
C00436	N-Carbamoylputrescine	HMDB0033458	502	C00436	C(CCNC(=O)N)CN	1
C00153	Niacinamide	HMDB0001406	936	C00153	C1=CC(=CN=C1)C(=O)N	1
C00262	Hypoxanthine	HMDB0000157	790	C00262	C1=NC2=C(N1)C(=O)N=CN2	1
C08276	3-Methylthiopropionic acid	HMDB0001527	563	C08276	CSCCC(=O)O	1
G00146	(GlcN)1 (Ino(acyl)-P)1 (Man)1	METPA1584	NA	G00146	NA	1
C17622	10-Oxogeranial	METPA1454	NA	C17622	NA	1
C11924	Perillic acid	HMDB0004586	1256	C11924	CC(=C)C1CCC(=CC1)C(=O)O	1
C03742	(S)-4-Hydroxymandelonitrile	HMDB0060318	440104	C03742	O[C@H](C#N)C1=CC=C(O)C=C1	1
C04536	Magnesium protoporphyrin monomethyl ester	METPA0508	NA	C04536	NA	1
C11434	2-C-Methyl-D-erythritol 4-phosphate	METPA1027	NA	C11434	NA	1
C15796	22alpha-Hydroxy-campest-4-en-3-one	METPA1661	NA	C15796	NA	1
C04666	D-Erythro-imidazole-glycerol-phosphate	HMDB0012208	440431	C04666	C1=C(NC=N1)[C@@H]([C@@H](COP(=O)(O)O)O)O	1
C00364	5-Thymidylic acid	HMDB0001227	9700	C00364	CC1=CN(C(=O)NC1=O)[C@H]2C[C@@H]([C@H](O2)COP(=O)(O)O)O	1
C00299	Uridine	HMDB0000296	6029	C00299	C1=CN(C(=O)NC1=O)[C@H]2[C@@H]([C@@H]([C@H](O2)CO)O)O	1
C16361	1,3,7-Trimethyluric acid	HMDB0002123	79437	C16361	CN1C2=C(NC1=O)N(C(=O)N(C2=O)C)C	1
C05345	Beta-D-Fructose 6-phosphate	HMDB0003971	440641	C05345	C([C@@H]1[C@H]([C@@H]([C@](O1)(CO)O)O)O)OP(=O)(O)O	1
C00668	Glucose 6-phosphate	HMDB0001401	5958	C00668	OC1O[C@H](COP(O)(O)=O)[C@@H](O)[C@H](O)[C@H]1O	1
C00103	Glucose 1-phosphate	HMDB0001586	439165	C00103	C([C@@H]1[C@H]([C@@H]([C@H](C(O1)OP(=O)(O)O)O)O)O)O	1
C01172	Beta-D-Glucose 6-phosphate	HMDB0003498	439427	C01172	C([C@@H]1[C@H]([C@@H]([C@H]([C@@H](O1)O)O)O)O)OP(=O)(O)O	1
C00673	Deoxyribose 5-phosphate	HMDB0001031	45934311	C00673	C1[C@@H]([C@H](O[C@H]1O)COP(=O)(O)O)O	1
C00275	Mannose 6-phosphate	HMDB0001078	439198	C00275	C([C@@H]1[C@H]([C@@H]([C@@H]([C@@H](O1)O)O)O)O)OP(=O)(O)O	1
C00636	D-Mannose 1-phosphate	HMDB0006330	644175	C00636	C([C@@H]1[C@H]([C@@H]([C@@H](C(O1)OP(=O)(O)O)O)O)O)O	1
C01094	3a,6b,7a,12a-Tetrahydroxy-5b-cholanoic acid	HMDB0000399	5283899	C01094	C[C@H](CCC(=O)O)[C@H]1CC[C@@H]2[C@@]1([C@H](C[C@H]3[C@H]2[C@@H]([C@H]([C@H]4[C@@]3(CC[C@H](C4)O)C)O)O)O)C	1
C01097	D-Tagatose 6-phosphate	HMDB0006873	439396	C01097	C([C@@H]1[C@@H]([C@@H](C(O1)(CO)O)O)O)OP(=O)(O)O	1
C00446	Galactose 1-phosphate	HMDB0000645	123912	C00446	C([C@@H]1[C@@H]([C@@H]([C@H]([C@H](O1)OP(=O)(O)O)O)O)O)O	1
C15926	L-Galactose 1-phosphate	METPA1227	NA	C15926	NA	1
C00092	Glucose 6-phosphate	HMDB0001401	5958	C00092	C([C@@H]1[C@H]([C@@H]([C@H](C(O1)O)O)O)O)OP(=O)(O)O	1
C00085	Fructose 6-phosphate	HMDB0000124	69507	C00085	C([C@H]([C@H]([C@@H](C(=O)CO)O)O)O)OP(=O)(O)O	1
C03862	Dolichyl phosphate D-mannose	HMDB0000994	3246168	C03862	C([C@@H]1[C@H]([C@@H]([C@@H]([C@@H](O1)OP(=O)(O)O)O)O)O)O	1
C03546	D-Myo-inositol 4-phosphate	HMDB0001313	440043	C03546	O[C@@H]1[C@H](O)[C@H](O)[C@@H](OP(O)(O)=O)[C@H](O)[C@H]1O	1
C04006	1D-myo-Inositol 3-phosphate	HMDB0006814	440194	C04006	[C@H]1([C@@H](C([C@H]([C@@H](C1O)O)O)OP(=O)(O)O)O)O	1
C01177	Myo-inositol 1-phosphate	HMDB0000213	NA	C01177	O[C@H]1[C@H](O)[C@H](O)[C@H](OP(O)(O)=O)[C@@H](O)[C@@H]1O	1
C11437	1-Deoxy-D-xylulose 5-phosphate	HMDB0001213	443201	C11437	CC(=O)[C@H]([C@@H](COP(=O)(O)O)O)O	1
C03263	Coproporphyrinogen III	HMDB0001261	321	C03263	CC1=C2CC3=C(C(=C(N3)CC4=C(C(=C(N4)CC5=C(C(=C(N5)CC(=C1CCC(=O)O)N2)C)CCC(=O)O)C)CCC(=O)O)CCC(=O)O)C	1
C05768	Coproporphyrinogen I	HMDB0002158	68271	C05768	CC1=C2CC3=C(C(=C(N3)CC4=C(C(=C(N4)CC5=C(C(=C(N5)CC(=C1CCC(=O)O)N2)C)CCC(=O)O)C)CCC(=O)O)C)CCC(=O)O	1
C05668	3-Hydroxypropionyl-CoA	HMDB0006807	440753	C05668	CC(C)(COP(=O)(O)OP(=O)(O)OC[C@@H]1[C@H]([C@H]([C@@H](O1)N2C=NC3=C2N=CN=C3N)O)OP(=O)(O)O)C(C(=O)NCCC(=O)NCCSC(=O)CCO)O	1
C00105	Uridine 5'-monophosphate	HMDB0000288	6030	C00105	C1=CN(C(=O)NC1=O)[C@H]2[C@@H]([C@@H]([C@H](O2)COP(=O)(O)O)O)O	1
C01168	Pseudouridine 5'-phosphate	HMDB0001271	439424	C01168	C1=C(C(=O)NC(=O)N1)[C@H]2[C@@H]([C@@H]([C@H](O2)COP(=O)(O)O)O)O	1
C02938	3-Indoleacetonitrile	HMDB0006524	351795	C02938	C1=CC=C2C(=C1)C(=CN2)CC#N	1
