# Supplementary material for: Targeted and Untargeted Metabolomic Analyses Reveal Organ Specificity of Specialized Metabolites in the Model Grass Brachypodium distachyon
Source: Molecules. 2022 Sep 13;27(18):5956. doi: 10.3390/molecules27185956 (PMC9506550; doi:10.3390/molecules27185956)
Supplement: Supplementary file 1 [file molecules-27-05956-s001.zip › Supplementary Table S3.xlsx]

## Sheet: pathway results
Supplementary Table S3. Pathway mapping conducted on m/z signals significantly differentiating leaves of Bd21 and Bd3‐1 lines; “pathway results” sheet contains scoring of pathway enrichment; “name map” sheet contains metabolites annotation to Kyoto Encyclopedia of Genes and Genomes (KEGG) database and conversion of KEGG identifiers to Human Metabolome Database (HMDB) and PubChem identifiers. Tota…
	Total	Expected	Hits	Raw p	#NAME?	Holm adjust	FDR	Impact
Flavonoid biosynthesis	47	24.254	42	2.51e-08	7.5995	2.39e-06	2.39e-06	0.7644
Galactose metabolism	27	13.933	24	4.17e-05	4.3803	0.0039156	0.0019786	1
Valine, leucine and isoleucine biosynthesis	22	11.353	20	9.68e-05	4.0141	0.0090022	0.0030653	0.8355
Histidine metabolism	17	8.7726	16	0.00020595	3.6862	0.018948	0.0048914	1
Flavone and flavonol biosynthesis	12	6.1924	12	0.00034108	3.4671	0.031038	0.0054004	0
2-Oxocarboxylic acid metabolism	12	6.1924	12	0.00034108	3.4671	0.031038	0.0054004	0
Pentose phosphate pathway	19	9.8047	17	0.00054776	3.2614	0.04875	0.0074338	0.99999
Vitamin B6 metabolism	11	5.6764	11	0.00066589	3.1766	0.058599	0.0079075	0.99999
Diterpenoid biosynthesis	47	24.254	34	0.0026571	2.5756	0.23117	0.028047	0.69919
Cysteine and methionine metabolism	46	23.738	33	0.0038365	2.4161	0.32994	0.035754	0.75798
Pyrimidine metabolism	38	19.609	28	0.00414	2.383	0.3519	0.035754	0.79827
One carbon pool by folate	8	4.1283	8	0.0049349	2.3067	0.41453	0.039068	1
Porphyrin and chlorophyll metabolism	47	24.254	33	0.0066165	2.1794	0.54917	0.048351	0.94868
Pentose and glucuronate interconversions	17	8.7726	14	0.0087682	2.0571	0.71899	0.059498	0.85716
Phenylalanine, tyrosine and tryptophan biosynthesis	22	11.353	17	0.011991	1.9212	0.97124	0.075941	0.77277
Caffeine metabolism	10	5.1604	9	0.013636	1.8653	1	0.080967	0
Nicotinate and nicotinamide metabolism	13	6.7085	11	0.014688	1.833	1	0.08208	0.78788
Biosynthesis of secondary metabolites - other antibiotics	6	3.0962	6	0.018695	1.7283	1	0.098665	1
Tryptophan metabolism	23	11.869	17	0.024129	1.6175	1	0.11472	1
Lysine biosynthesis	9	4.6443	8	0.024151	1.6171	1	0.11472	0.78377
Arginine and proline metabolism	28	14.449	20	0.025542	1.5928	1	0.11555	0.69728
Limonene and pinene degradation	5	2.5802	5	0.036349	1.4395	1	0.15696	1
Ascorbate and aldarate metabolism	18	9.2887	13	0.062144	1.2066	1	0.24599	0.85075
Arginine biosynthesis	18	9.2887	13	0.062144	1.2066	1	0.24599	0.93787
Starch and sucrose metabolism	22	11.353	15	0.08704	1.0603	1	0.33075	0.83039
Purine metabolism	63	32.51	38	0.098701	1.0057	1	0.36064	0.6714
Monoterpenoid biosynthesis	6	3.0962	5	0.12462	0.90441	1	0.39463	0
Anthocyanin biosynthesis	6	3.0962	5	0.12462	0.90441	1	0.39463	0
Isoquinoline alkaloid biosynthesis	6	3.0962	5	0.12462	0.90441	1	0.39463	0.64705
C5-Branched dibasic acid metabolism	6	3.0962	5	0.12462	0.90441	1	0.39463	1
Riboflavin metabolism	11	5.6764	8	0.13434	0.87179	1	0.41169	0.86668
Fructose and mannose metabolism	20	10.321	13	0.16315	0.78741	1	0.48435	0.77366
Terpenoid backbone biosynthesis	29	14.965	18	0.17074	0.76767	1	0.49152	0.70666
Alanine, aspartate and glutamate metabolism	22	11.353	14	0.17821	0.74908	1	0.49793	0.93525
Phenylpropanoid biosynthesis	35	18.061	21	0.2021	0.69443	1	0.54856	0.4429
Amino sugar and nucleotide sugar metabolism	50	25.802	29	0.21875	0.66006	1	0.56746	0.75652
Phenylalanine metabolism	12	6.1924	8	0.22533	0.64718	1	0.56746	0.96154
Carbon fixation in photosynthetic organisms	21	10.837	13	0.23296	0.63272	1	0.56746	0.67282
Zeatin biosynthesis	21	10.837	13	0.23296	0.63272	1	0.56746	0.76424
Pantothenate and CoA biosynthesis	23	11.869	14	0.24711	0.60711	1	0.58689	0.76675
Tyrosine metabolism	18	9.2887	11	0.28388	0.54686	1	0.65777	0.67569
Stilbenoid, diarylheptanoid and gingerol biosynthesis	11	5.6764	7	0.31099	0.50725	1	0.70344	0.5
Cyanoamino acid metabolism	26	13.417	15	0.335	0.47496	1	0.72329	0.14286
Glycolysis / Gluconeogenesis	26	13.417	15	0.335	0.47496	1	0.72329	0.58313
Monobactam biosynthesis	8	4.1283	5	0.39858	0.39949	1	0.82315	0
Tropane, piperidine and pyridine alkaloid biosynthesis	8	4.1283	5	0.39858	0.39949	1	0.82315	0
Thiamine metabolism	22	11.353	12	0.47577	0.32261	1	0.96166	0.86127
Betalain biosynthesis	3	1.5481	2	0.52406	0.28062	1	1	0
Butanoate metabolism	17	8.7726	9	0.5537	0.25673	1	1	0.36363
Glycine, serine and threonine metabolism	33	17.029	17	0.57451	0.24071	1	1	0.54413
Arachidonic acid metabolism	12	6.1924	6	0.65607	0.18305	1	1	0
Sesquiterpenoid and triterpenoid biosynthesis	8	4.1283	4	0.67166	0.17285	1	1	0.23529
Taurine and hypotaurine metabolism	6	3.0962	3	0.68619	0.16355	1	1	0
Linoleic acid metabolism	4	2.0641	2	0.71145	0.14786	1	1	0
Sphingolipid metabolism	17	8.7726	8	0.73269	0.13508	1	1	0.52884
Sulfur metabolism	15	7.7406	7	0.74011	0.1307	1	1	0.24309
beta-Alanine metabolism	18	9.2887	8	0.80191	0.095875	1	1	0.2619
Phosphonate and phosphinate metabolism	5	2.5802	2	0.83235	0.079695	1	1	0
Biosynthesis of secondary metabolites - unclassified	5	2.5802	2	0.83235	0.079695	1	1	1
Valine, leucine and isoleucine degradation	37	19.093	16	0.8846	0.053253	1	1	0.24391
Biosynthesis of unsaturated fatty acids	22	11.353	9	0.89021	0.050507	1	1	0
Glyoxylate and dicarboxylate metabolism	29	14.965	12	0.90356	0.044044	1	1	0.33016
Lysine degradation	18	9.2887	7	0.90759	0.042108	1	1	0.5
Folate biosynthesis	27	13.933	11	0.90928	0.041302	1	1	0.37452
Glycerolipid metabolism	21	10.837	8	0.92946	0.031771	1	1	0.17804
Aminoacyl-tRNA biosynthesis	46	23.738	19	0.94213	0.025887	1	1	0.27778
Synthesis and degradation of ketone bodies	4	2.0641	1	0.94539	0.024388	1	1	0
Carotenoid biosynthesis	42	21.674	17	0.94783	0.023268	1	1	0.6152
alpha-Linolenic acid metabolism	27	13.933	10	0.95818	0.018553	1	1	0.43517
Propanoate metabolism	20	10.321	7	0.95827	0.018511	1	1	0.29329
Citrate cycle (TCA cycle)	20	10.321	7	0.95827	0.018511	1	1	0.40153
Selenocompound metabolism	13	6.7085	4	0.96467	0.015619	1	1	0.84874
Inositol phosphate metabolism	28	14.449	10	0.97125	0.01267	1	1	0.31171
Ubiquinone and other terpenoid-quinone biosynthesis	35	18.061	13	0.97205	0.012313	1	1	0.12168
Glutathione metabolism	27	13.933	9	0.98333	0.0073002	1	1	0.61549
Brassinosteroid biosynthesis	20	10.321	6	0.98603	0.0061118	1	1	0.11112
Glycosylphosphatidylinositol (GPI)-anchor biosynthesis	13	6.7085	3	0.99197	0.0035032	1	1	0.32571
Pyruvate metabolism	22	11.353	6	0.99473	0.002295	1	1	0.31539
Cutin, suberine and wax biosynthesis	14	7.2245	3	0.99555	0.0019377	1	1	0.5
Nitrogen metabolism	12	6.1924	2	0.9978	0.00095577	1	1	0
Fatty acid elongation	23	11.869	5	0.99928	0.00031222	1	1	0
Phosphatidylinositol signaling system	26	13.417	6	0.99934	0.00028513	1	1	0.19358
Biotin metabolism	18	9.2887	3	0.99962	0.0001664	1	1	0.21538
Glycerophospholipid metabolism	37	19.093	9	0.99985	6.72e-05	1	1	0.27335
Fatty acid degradation	37	19.093	8	0.99996	1.55e-05	1	1	0.17602
N-Glycan biosynthesis	35	18.061	7	0.99998	9.55e-06	1	1	0.09764
Steroid biosynthesis	40	20.641	7	1	5.27e-07	1	1	0.15384
Fatty acid biosynthesis	56	28.898	6	1	2.44e-12	1	1	0.01123

## Sheet: name map
Query	Match	HMDB	PubChem	KEGG	SMILES	Comment
C18015	Momilactone A	NA	96024235	C18015	NA	1
C00864	Pantothenic acid	HMDB0000210	6613	C00864	CC(C)(CO)C(C(=O)NCCC(=O)O)O	1
C00032	Heme	HMDB0003178	26945	C00032	CC1=C(CCC(O)=O)C2=CC3=[N+]4C(=CC5=C(C=C)C(C)=C6C=C7C(C=C)=C(C)C8=[N+]7[Fe@]4(N2C1=C8)N56)C(C)=C3CCC(O)=O	1
C00831	Pantetheine	HMDB0003426	479	C00831	CC(C)(CO)C(C(=O)NCCC(=O)NCCS)O	1
C05904	Pelargonidin	HMDB0003263	67249	C05904	C1=CC(=CC=C1C2=C(C=C3C(=CC(=CC3=[O+]2)O)O)O)O.[Cl-]	1
C04051	5-Aminoimidazole-4-carboxamide	HMDB0003192	9679	C04051	C1=NC(=C(N1)C(=O)N)N	1
C00470	Pectic acid	HMDB0003363	445929	C00470	[C@@H]1([C@H]([C@H](O[C@@H]([C@@H]1O)O)C(=O)O)O)O	1
C00191	D-Glucuronic acid	HMDB0000127	94715	C00191	[C@@H]1([C@@H]([C@H](O[C@@H]([C@@H]1O)O)C(=O)O)O)O	1
C00719	Betaine	HMDB0000043	247	C00719	C[N+](C)(C)CC(=O)[O-]	1
C00183	L-Valine	HMDB0000883	6287	C00183	CC(C)[C@@H](C(=O)O)N	1
C01077	Acetylhomoserine	HMDB0029423	528	C01077	CC(=O)OCCC(C(=O)O)N	1
C04076	Allysine	HMDB0001263	207	C04076	C(CC=O)CC(C(=O)O)N	1
C00956	Aminoadipic acid	HMDB0000510	469	C00956	C(CC(C(=O)O)N)CC(=O)O	1
C02946	4-Acetamidobutanoic acid	HMDB0003681	18189	C02946	CC(=O)NCCCC(=O)O	1
C18796	(2R)-2-Hydroxy-2-methylbutanenitrile	HMDB0060309	12650900	C18796	CC[C@@](C)(O)C#N	1
C00129	Isopentenyl pyrophosphate	HMDB0001347	1195	C00129	CC(=C)CCOP(=O)(O)OP(=O)(O)O	1
C00235	Dimethylallylpyrophosphate	HMDB0001120	647	C00235	CC(=CCOP(=O)(O)OP(=O)(O)O)C	1
C21833	Kaempferol-3-O-rutinoside	NA		C21833	NA	1
C21854	Kaempferol 3-O-rhamnoside-7-O-glucoside	NA	NA	C21854	NA	1
C01530	Stearic acid	HMDB0000827	5281	C01530	CCCCCCCCCCCCCCCCCC(=O)O	1
C08604	Cyanidin 3-glucoside	HMDB0030684	4481259	C08604	C1=CC(=C(C=C1C2=C(C=C3C(=CC(=CC3=[O+]2)O)O)OC4C(C(C(C(O4)CO)O)O)O)O)O	1
C04732	5-Amino-6-ribitylamino uracil	HMDB0011106	221	C04732	C(C(C(C(CO)O)O)O)NC1=C(C(=O)NC(=O)N1)N	1
C11355	4-Amino-4-deoxychorismate	METPA0993	NA	C11355	NA	1
C10434	Dattelic acid	HMDB0033999	6124136	C10434	C1C(C(C(C=C1C(=O)O)O)O)OC(=O)/C=C/C2=CC(=C(C=C2)O)O	1
C00666	Diaminopimelic acid	HMDB0001370	99290	C00666	C(C[C@@H](C(=O)O)N)C[C@@H](C(=O)O)N	1
C12144	Phytosphingosine	HMDB0004610	122121	C12144	CCCCCCCCCCCCCC[C@H]([C@H]([C@H](CO)N)O)O	1
C01210	N-Methylethanolamine phosphate	METPA0145	NA	C01210	NA	1
C05699	Selenocystathionine	HMDB0006343	98223	C05699	C(C[Se]CC(C(=O)O)N)C(C(=O)O)N	1
C08325	Amygdalin	HMDB0035030	34751	C08325	C1=CC=C(C=C1)C(C#N)OC2C(C(C(C(O2)COC3C(C(C(C(O3)CO)O)O)O)O)O)O	1
C04672	(9Z,15Z)-(13S)-12,13-Epoxyoctadeca-9,11,15-trienoic acid	METPA0529	NA	C04672	NA	1
C00836	Sphinganine	HMDB0000269	91486	C00836	CCCCCCCCCCCCCCC[C@H]([C@H](CO)N)O	1
C01750	Quercitrin	HMDB0033751	5280459	C01750	C[C@H]1[C@@H]([C@H]([C@H]([C@@H](O1)OC2=C(OC3=CC(=CC(=C3C2=O)O)O)C4=CC(=C(C=C4)O)O)O)O)O	1
C12249	Kaempferol-3-O-glucoside	HMDB0037429	5282102	C12249	OC[C@H]1O[C@@H](OC2=C(OC3=CC(O)=CC(O)=C3C2=O)C2=CC=C(O)C=C2)[C@H](O)[C@@H](O)[C@@H]1O	1
C04079	D-Pantothenoyl-L-cysteine	HMDB0006834	440217	C04079	CC(C)(CO)[C@H](C(=O)NCCC(=O)N[C@@H](CS)C(=O)O)O	1
C01134	Pantetheine 4'-phosphate	HMDB0001416	987	C01134	CC(C)(COP(=O)(O)O)C(C(=O)NCCC(=O)NCCS)O	1
C00019	S-Adenosylmethionine	HMDB0001185	16757548	C00019	C[S+](CC[C@H](C(=O)O)N)C[C@@H]1[C@H]([C@H]([C@@H](O1)N2C=NC3=C2N=CN=C3N)O)O	1
C00253	Nicotinic acid	HMDB0001488	938	C00253	C1=CC(=CN=C1)C(=O)O	1
C05651	5-Hydroxykynurenine	HMDB0012819	440745	C05651	C1=CC(=C(C=C1O)C(=O)CC(C(=O)O)N)N	1
C05273	(2E)-Tetradecenoyl-CoA	HMDB0003946	5280767	C05273	CCCCCCCCCCC/C=C/C(=O)SCCNC(=O)CCNC(=O)C(C(C)(C)COP(=O)(O)OP(=O)(O)OC[C@@H]1[C@H]([C@H]([C@@H](O1)N2C=NC3=C2N=CN=C3N)O)OP(=O)(O)O)O	1
C04677	AICAR	HMDB0001517	65110	C04677	C1=NC(=C(N1[C@H]2[C@@H]([C@@H]([C@H](O2)COP(=O)(O)O)O)O)N)C(=O)N	1
C17214	2-(3'-Methylthio)propylmalic acid	METPA1767	NA	C17214	NA	1
C17215	3-(3'-Methylthio)propylmalic acid	NA	96023623	C17215	NA	1
C00170	5'-Methylthioadenosine	HMDB0001173	439176	C00170	CSC[C@@H]1[C@H]([C@H]([C@@H](O1)N2C=NC3=C2N=CN=C3N)O)O	1
C00499	Allantoic acid	HMDB0001209	203	C00499	C(C(=O)O)(NC(=O)N)NC(=O)N	1
C05634	5-Hydroxyindoleacetaldehyde	HMDB0004073	74688	C05634	C1=CC2=C(C=C1O)C(=CN2)CC=O	1
C00954	Indoleacetic acid	HMDB0000197	802	C00954	C1=CC=C2C(=C1)C(=CN2)CC(=O)O	1
C03579	2beta-Hydroxygibberellin 1	METPA1641	NA	C03579	NA	1
C05859	Dehydrodolichol diphosphate	NA	8152	C05859	NA	1
C00673	Deoxyribose 5-phosphate	HMDB0001031	45934311	C00673	C1[C@@H]([C@H](O[C@H]1O)COP(=O)(O)O)O	1
C11437	1-Deoxy-D-xylulose 5-phosphate	HMDB0001213	443201	C11437	CC(=O)[C@H]([C@@H](COP(=O)(O)O)O)O	1
C00647	Pyridoxamine 5'-phosphate	HMDB0001555	1053	C00647	CC1=NC=C(C(=C1O)CN)COP(=O)(O)O	1
C12128	(-)-Epiafzelechin	HMDB0030822	443639	C12128	C1[C@H]([C@H](OC2=CC(=CC(=C21)O)O)C3=CC=C(C=C3)O)O	1
C09320	Afzelechin	HMDB0030823	282014	C09320	C1C(C(OC2=CC(=CC(=C21)O)O)C3=CC=C(C=C3)O)O	1
C00774	Phloretin	HMDB0003306	4788	C00774	C1=CC(=CC=C1CCC(=O)C2=C(C=C(C=C2O)O)O)O	1
C00655	Xanthylic acid	HMDB0001554	73323	C00655	C1=NC2=C(N1[C@H]3[C@@H]([C@@H]([C@H](O3)COP(=O)(O)O)O)O)NC(=O)NC2=O	1
C10107	Myricetin	HMDB0002755	5281672	C10107	C1=C(C=C(C(=C1O)O)O)C2=C(C(=O)C3=C(C=C(C=C3O2)O)O)O	1
C05947	L-erythro-4-Hydroxyglutamate	NA	8231	C05947	NA	1
C05399	Melibiitol	HMDB0006791	440655	C05399	C([C@@H]1[C@@H]([C@@H]([C@H]([C@H](O1)O)O)O)O)OC[C@@H]([C@H]([C@@H]([C@@H](CO)O)O)O)O	1
C08491	Jasmonic acid	HMDB0032797	5281166	C08491	CC/C=C\C[C@@H]1[C@H](CCC1=O)CC(=O)O	1
C11857	Gibberellin A12	METPA1650	NA	C11857	NA	1
C15514	8'-Hydroxyabscisate	METPA1680	NA	C15514	NA	1
C04454	5-Amino-6-(5'-phosphoribitylamino)uracil	HMDB0003841	333	C04454	C(C(C(C(COP(=O)(O)O)O)O)O)NC1=C(C(=O)NC(=O)N1)N	1
C00062	L-Arginine	HMDB0000517	6322	C00062	C(C[C@@H](C(=O)O)N)CN=C(N)N	1
C11831	Divinylprotochlorophyllide	METPA1061	NA	C11831	NA	1
C11855	Gibberellin A29-catabolite	METPA1827	NA	C11855	NA	1
C04376	5'-Phosphoribosyl-N-formylglycinamide	HMDB0001308	16048611	C04376	C([C@@H]1[C@H]([C@H]([C@@H](O1)NC(=O)CNC=O)O)O)OP(=O)(O)O	1
C21015	gamma-L-Glutamyl-L-2-aminobutyrate	NA	254741469	C21015	NA	1
C02059	Vitamin K1	HMDB0003555	5280483	C02059	CC1=C(C(=O)C2=CC=CC=C2C1=O)C/C=C(\C)/CCCC(C)CCCC(C)CCCC(C)C	1
C15801	6-Deoxotyphasterol	METPA1211	NA	C15801	NA	1
C15799	6-Deoxoteasterone	METPA1209	NA	C15799	NA	1
C00504	Folic acid	HMDB0000121	6037	C00504	C1=CC(=CC=C1C(=O)N[C@@H](CCC(=O)O)C(=O)O)NCC2=CN=C3C(=N2)C(=O)N=C(N3)N	1
C12208	3-O-p-Coumaroylquinic acid	HMDB0029681	9945785	C12208	O[C@@H]1C[C@@](O)(C[C@@H](OC(=O)\C=C\C2=CC=C(O)C=C2)[C@H]1O)C(O)=O	1
C17226	2-(6'-Methylthio)hexylmalic acid	METPA1770	NA	C17226	NA	1
C17227	3-(6'-Methylthio)hexylmalic acid	NA	96023635	C17227	NA	1
C10287	4-[(E)-2-(3,5-dimethoxyphenyl)ethenyl]phenol	HMDB0130987	5281727	C10287	[H]\C(=C(\[H])C1=CC(OC)=CC(OC)=C1)C1=CC=C(O)C=C1	1
C00295	Orotic acid	HMDB0000226	967	C00295	C1=C(NC(=O)NC1=O)C(=O)O	1
C04713	N6-(delta2-Isopentenyl)-adenosine 5'-monophosphate	METPA1686	NA	C04713	NA	1
C05401	Galactosylglycerol	HMDB0006790	656504	C05401	C([C@@H]1[C@@H]([C@@H]([C@H]([C@@H](O1)OCC(CO)O)O)O)O)O	1
C00822	Dopaquinone	HMDB0001229	439316	C00822	C1=CC(=O)C(=O)C=C1C[C@@H](C(=O)O)N	1
C16360	3,7-Dimethyluric acid	HMDB0001982	83126	C16360	CN1C2=C(NC1=O)N(C(=O)NC2=O)C	1
C16356	1,7-Dimethyluric acid	HMDB0011103	91611	C16356	CN1C2=C(NC1=O)NC(=O)N(C2=O)C	1
C04823	SAICAR	HMDB0000797	160666	C04823	C1=NC(=C(N1[C@H]2[C@@H]([C@@H]([C@H](O2)COP(=O)(O)O)O)O)N)C(=O)N[C@@H](CC(=O)O)C(=O)O	1
C00859	Gibberellin A1	METPA0089	NA	C00859	NA	1
C06096	Gibberellin A29	METPA1656	NA	C06096	NA	1
C11868	Gibberellin A34	METPA1644	NA	C11868	NA	1
C01419	Cysteinylglycine	HMDB0000078	439498	C01419	C([C@@H](C(=O)NCC(=O)O)N)S	1
C02631	Isopropylmaleate	HMDB0012241	5280533	C02631	CC(C)/C(=C/C(=O)O)/C(=O)O	1
C02504	2-Isopropylmalic acid	HMDB0000402	5280523	C02504	CC(C)[C@@](CC(=O)O)(C(=O)O)O	1
C04411	3-Isopropylmalate	HMDB0012156	5462261	C04411	CC(C)[C@@H]([C@H](C(=O)O)O)C(=O)O	1
C21016	Ophthalmic acid	HMDB0005765	7018721	C21016	CC[C@@H](C(=O)NCC(=O)O)NC(=O)CC[C@@H](C(=O)O)N	1
C03406	Argininosuccinic acid	HMDB0000052	16950	C03406	C(C[C@@H](C(=O)O)N)CN=C(N)N[C@@H](CC(=O)O)C(=O)O	1
C02029	Dihydrozeatin	HMDB0012215	439631	C02029	C[C@@H](CCNC1=NC=NC2=C1NC=N2)CO	1
C00491	L-Cystine	HMDB0000192	67678	C00491	C([C@@H](C(=O)O)N)SSC[C@@H](C(=O)O)N	1
C00909	Leukotriene A4	HMDB0001337	5280383	C00909	CCCCC/C=C\C/C=C\C=C\C=C\[C@H]1[C@@H](O1)CCCC(=O)O	1
C11875	ent-7alpha-Hydroxykaur-16-en-19-oic acid	METPA1652	NA	C11875	NA	1
C00089	Sucrose	HMDB0000258	5988	C00089	C([C@@H]1[C@H]([C@@H]([C@H]([C@H](O1)O[C@]2([C@H]([C@@H]([C@H](O2)CO)O)O)CO)O)O)O)O	1
C05402	Melibiose	HMDB0000048	440658	C05402	OC[C@H]1O[C@H](OC[C@H]2O[C@H](O)[C@H](O)[C@@H](O)[C@H]2O)[C@@H](O)[C@@H](O)[C@@H]1O	1
C05400	Isomaltose	HMDB0002923	440656	C05400	OC[C@H]1O[C@H](OC[C@H]2O[C@H](O)[C@H](O)[C@@H](O)[C@H]2O)[C@@H](O)[C@@H](O)[C@@H]1O	1
C01235	Beta-Cortol	HMDB0005821	246164	C01235	C[C@]12CC[C@H](C[C@H]1CC[C@@H]3[C@@H]2[C@H](C[C@]4([C@H]3CC[C@@]4([C@@H](CO)O)O)C)O)O	1
C00243	Alpha-Lactose	HMDB0000186	84571	C00243	C([C@@H]1[C@@H]([C@@H]([C@H]([C@@H](O1)O[C@@H]2[C@H](O[C@@H]([C@@H]([C@H]2O)O)O)CO)O)O)O)O	1
C00185	1-beta-D-Glucopyranosyl-4-D-glucopyranose	MA3TEM061	3485	C00185	C(CC=O)CC=O	1
C01083	Trehalose	HMDB0000975	7427	C01083	C([C@@H]1[C@H]([C@@H]([C@H]([C@H](O1)O[C@@H]2[C@@H]([C@H]([C@@H]([C@H](O2)CO)O)O)O)O)O)O)O	1
C00208	D-Maltose	HMDB0000163	10991489	C00208	C([C@@H]1[C@H]([C@@H]([C@H]([C@H](O1)O[C@@H]2[C@H](O[C@@H]([C@H]([C@H]2O)O)O)CO)O)O)O)O	1
C03506	Indoleglycerol phosphate	METPA0401	NA	C03506	NA	1
C01079	Protoporphyrinogen IX	HMDB0001097	121893	C01079	CC1=C2CC3=C(C(=C(N3)CC4=C(C(=C(N4)CC5=C(C(=C(N5)CC(=C1CCC(=O)O)N2)CCC(=O)O)C)C=C)C)C=C)C	1
C00224	Adenosine phosphosulfate	HMDB0001003	10238	C00224	C1=NC2=C(C(=N1)N)N=CN2[C@H]3[C@@H]([C@@H]([C@H](O3)COP(=O)(O)OS(=O)(=O)O)O)O	1
C06055	O-Phospho-4-hydroxy-L-threonine	HMDB0006802	440901	C06055	C([C@H]([C@@H](C(=O)O)N)O)OP(=O)(O)O	1
C00341	Geranyl 2-methylbutyrate	HMDB0032291	6437648	C00341	CCC(C)C(=O)OC/C=C(\C)/CCC=C(C)C	1
C05404	D-Gal alpha 1->6D-Gal alpha 1->6D-Glucose	HMDB0060468	440660	C05404	OC[C@H]1O[C@H](OC[C@H]2O[C@H](OC[C@H]3OC(O)[C@H](O)[C@@H](O)[C@@H]3O)[C@H](O)[C@@H](O)[C@H]2O)[C@H](O)[C@@H](O)[C@H]1O	1
C00492	Raffinose	HMDB0003213	10542	C00492	C([C@@H]1[C@@H]([C@@H]([C@H](C(O1)OC[C@@H]2[C@H]([C@@H]([C@H](C(O2)O[C@]3([C@H]([C@@H]([C@H](O3)CO)O)O)CO)O)O)O)O)O)O)O	1
C00721	Dextrin	HMDB0006857	62698	C00721	C([C@@H]1[C@H]([C@@H]([C@H](C(O1)O[C@@H]2[C@H](OC([C@@H]([C@H]2O)O)O[C@@H]3[C@H](O[C@@H]([C@@H]([C@H]3O)O)O)CO)CO)O)O)O)O	1
C01236	6-Phosphonoglucono-D-lactone	HMDB0001127	439452	C01236	C([C@@H]1[C@H]([C@@H]([C@H](C(=O)O1)O)O)O)OP(=O)(O)O	1
C05993	Acetyl adenylate	HMDB0006880	440867	C05993	CC(=O)OP(=O)(O)OC[C@@H]1[C@H]([C@H]([C@@H](O1)N2C=NC3=C2N=CN=C3N)O)O	1
C00353	Geranylgeranyl-PP	HMDB0004486	447277	C00353	CC(=CCC/C(=C/CC/C(=C/CC/C(=C/COP(=O)(O)OP(=O)(O)O)/C)/C)/C)C	1
C06089	ent-Copalyl diphosphate	METPA0756	NA	C06089	NA	1
C05909	Leucodelphinidin	METPA1713	NA	C05909	NA	1
C00079	L-Phenylalanine	HMDB0000159	6140	C00079	C1=CC=C(C=C1)C[C@@H](C(=O)O)N	1
C01233	Glycerylphosphorylethanolamine	HMDB0000114	22833510	C01233	C(CO)N(CC(CO)O)P(=O)(O)O	1
C13482	Phosphodimethylethanolamine	HMDB0060244	151438	C13482	CN(C)CCOP(O)(O)=O	1
C03722	Quinolinic acid	HMDB0000232	1066	C03722	C1=CC(=C(N=C1)C(=O)O)C(=O)O	1
C00388	Histamine	HMDB0000870	774	C00388	C1=C(NC=N1)CCN	1
C06082	(S)-Abscisic acid	HMDB0035140	5702609	C06082	CC1=CC(=O)CC([C@]1(/C=C/C(=C/C(=O)O)/C)O)(C)C	1
C06178	1-Methylpyrrolinium	HMDB0060253	440932	C06178	C[N+]1=CCCC1	1
C19872	N-Formyl-4-amino-5-aminomethyl-2-methylpyrimidine	NA	135626338	C19872	NA	1
C00082	L-Tyrosine	HMDB0000158	6057	C00082	C1=CC(=CC=C1C[C@@H](C(=O)O)N)O	1
C02505	2-Phenylacetamide	HMDB0010715	7680	C02505	C1=CC=C(C=C1)CC(=O)N	1
C00018	Pyridoxal 5'-phosphate	HMDB0001491	1051	C00018	CC1=NC=C(C(=C1O)C=O)COP(=O)(O)O	1
C00852	Chlorogenic acid	HMDB0003164	1794427	C00852	C1[C@H]([C@H]([C@@H](C[C@@]1(C(=O)O)O)OC(=O)/C=C/C2=CC(=C(C=C2)O)O)O)O	1
C00483	Tyramine	HMDB0000306	5610	C00483	C1=CC(=CC=C1CCN)O	1
C00081	Inosine triphosphate	HMDB0000189	8583	C00081	C1=NC(=O)C2=C(N1)N(C=N2)[C@H]3[C@@H]([C@@H]([C@H](O3)COP(=O)(O)OP(=O)(O)OP(=O)(O)O)O)O	1
C01613	Stachyose	HMDB0003553	439531	C01613	C([C@@H]1[C@@H]([C@@H]([C@H]([C@H](O1)OC[C@@H]2[C@@H]([C@@H]([C@H]([C@H](O2)OC[C@@H]3[C@H]([C@@H]([C@H]([C@H](O3)O[C@]4([C@H]([C@@H]([C@H](O4)CO)O)O)CO)O)O)O)O)O)O)O)O)O)O	1
C03082	L-Aspartyl-4-phosphate	HMDB0012250	832	C03082	C(C(C(=O)O)N)C(=O)OP(=O)(O)O	1
C00104	IDP	HMDB0003335	644173	C00104	C1=NC(=O)C2=C(N1)N(C=N2)C3[C@@H]([C@@H]([C@H](O3)COP(=O)(O)OP(=O)(O)O)O)O	1
C04582	5-Methylthioribulose 1-phosphate	HMDB0001299	174549	C04582	CSC[C@H]([C@H](C(=O)COP(=O)(O)O)O)O	1
C04188	5-Methylthioribose 1-phosphate	HMDB0000963	53477720	C04188	CSCC1[C@H]([C@H](C(O1)OP(=O)(O)O)O)O	1
C15650	2,3-Diketo-5-methylthiopentyl-1-phosphate	METPA1194	NA	C15650	NA	1
C03221	(2E)-Dodecenoyl-CoA	HMDB0003712	5165851	C03221	CCCCCCCCC/C=C/C(=O)SCCNC(=O)CCNC(=O)[C@@H](C(C)(C)COP(=O)([O-])OP(=O)([O-])OC[C@@H]1[C@H]([C@H]([C@@H](O1)N2C=NC3=C2N=CN=C3N)O)OP(=O)([O-])[O-])O	1
C00506	Cysteic acid	HMDB0002757	25701	C00506	C(C(C(=O)O)N)S(=O)(=O)O	1
C00671	3-Methyl-2-oxovaleric acid	HMDB0000491	47	C00671	CCC(C)C(=O)C(=O)O	1
C17267	S-Sulfanylglutathione	NA	96023674	C17267	NA	1
C00249	Palmitic acid	HMDB0000220	985	C00249	CCCCCCCCCCCCCCCC(=O)O	1
C01245	Inositol 1,4,5-trisphosphate	HMDB0001498	439456	C01245	[C@H]1([C@@H]([C@H]([C@@H]([C@H]([C@@H]1OP(=O)(O)O)O)OP(=O)(O)O)OP(=O)(O)O)O)O	1
C01243	Inositol 1,3,4-trisphosphate	HMDB0001143	439455	C01243	[C@H]1([C@H]([C@@H]([C@H]([C@H]([C@H]1OP(=O)(O)O)O)OP(=O)(O)O)OP(=O)(O)O)O)O	1
C04083	N6-(delta2-Isopentenyl)-adenine	METPA1684	NA	C04083	NA	1
C00921	7,8-Dihydropteroic acid	HMDB0001412	170	C00921	C1C(=NC2=C(N1)NC(=NC2=O)N)CNC3=CC=C(C=C3)C(=O)O	1
C00072	Ascorbate	NA	3372	C00072	NA	1
C00294	Inosine	HMDB0000195	6021	C00294	C1=NC(=O)C2=C(N1)N(C=N2)[C@H]3[C@@H]([C@@H]([C@H](O3)CO)O)O	1
C00469	Ethanol	HMDB0000108	702	C00469	CCO	1
C01762	Xanthosine	HMDB0000299	64959	C01762	C1=NC2=C(N1[C@H]3[C@@H]([C@@H]([C@H](O3)CO)O)O)NC(=O)NC2=O	1
C04717	13-L-Hydroperoxylinoleic acid	HMDB0003871	6437847	C04717	CCCCC[C@@H](/C=C/C=C\CCCCCCCC(=O)O)OO	1
C14827	9(S)-HPODE	HMDB0006940	6439847	C14827	CCCCC/C=C\C=C\C(CCCCCCCC(=O)O)OO	1
C00448	Farnesyl pyrophosphate	HMDB0000961	445713	C00448	CC(=CCC/C(=C/CC/C(=C/COP(=O)(O)OP(=O)(O)O)/C)/C)C	1
C05427	Phytyl diphosphate	NA	7791	C05427	NA	1
C00437	N-Acetylornithine	HMDB0003357	439232	C00437	CC(=O)N[C@@H](CCCN)C(=O)O	1
C16540	7(1)-Hydroxychlorophyllide a	NA	51090869	C16540	NA	1
C18156	Bacteriochlorophyllide b	MA3TEM077	96024373	C18156	CC1=C(C2=C(CCN[C@H]2C3=CNC(=O)C(=C3)Cl)C=C1)C	1
C13453	Xanthoxin	HMDB0014693	586193	C13453	COC1=C2OC(=O)C=CC2=CC2=C1OC=C2	1
C00624	N-Acetylglutamic acid	HMDB0001138	185	C00624	CC(=O)NC(CCC(=O)O)C(=O)O	1
C17218	2-(4'-Methylthio)butylmalic acid	METPA1768	NA	C17218	NA	1
C17219	3-(4'-Methylthio)butylmalic acid	NA	96023627	C17219	NA	1
C05512	Deoxyinosine	HMDB0000071	65058	C05512	C1[C@@H]([C@H](O[C@H]1N2C=NC3=C2NC=NC3=O)CO)O	1
C01268	5-Amino-6-(5'-phosphoribosylamino)uracil	METPA0159	NA	C01268	NA	1
C00750	Spermine	HMDB0001256	1103	C00750	C(CCNCCCN)CNCCCN	1
C00881	Deoxycytidine	HMDB0000014	13711	C00881	C1[C@@H]([C@H](O[C@H]1N2C=CC(=NC2=O)N)CO)O	1
C05983	Propinol adenylate	HMDB0006806	440863	C05983	CCC(=O)OP(=O)(O)OC[C@@H]1[C@H]([C@H]([C@@H](O1)N2C=NC3=C2N=CN=C3N)O)O	1
C18155	bacteriochlorophyllide a	MA3TEM076	96024372	C18155	CC1=C(C=C2[C@H](NCCC2=C1)/C=C/C3=CC=NC=C3)C	1
C00026	Oxoglutaric acid	HMDB0000208	51	C00026	C(CC(=O)O)C(=O)C(=O)O	1
C00311	Isocitric acid	HMDB0000193	1198	C00311	C(C(C(C(=O)O)O)C(=O)O)C(=O)O	1
C00158	Citric acid	HMDB0000094	311	C00158	C(C(=O)O)C(CC(=O)O)(C(=O)O)O	1
C02612	(R)-2-Methylmalate	METPA0308	NA	C02612	NA	1
C00621	Dolichyl diphosphate	HMDB0001513	5462166	C00621	CC/C(=C/CCCC(C)CCOP(=O)(O)OP(=O)(O)O)/C	1
C05275	(2E)-Decenoyl-CoA	HMDB0003948	5280768	C05275	CCCCCCC/C=C/C(=O)SCCNC(=O)CCNC(=O)C(C(C)(C)COP(=O)(O)OP(=O)(O)OC[C@@H]1[C@H]([C@H]([C@@H](O1)N2C=NC3=C2N=CN=C3N)O)OP(=O)(O)O)O	1
C00147	Adenine	HMDB0000034	190	C00147	C1=NC2=C(N1)C(=NC=N2)N	1
C01300	2-Amino-4-hydroxy-6-hydroxymethyl-7,8-dihydropteridine	METPA0169	NA	C01300	NA	1
C05933	N-(o)-Hydroxyarginine	HMDB0004224	440849	C05933	C(CC(C(=O)O)N)CN=C(N)NO	1
C00135	L-Histidine	HMDB0000177	6274	C00135	C1=C(NC=N1)C[C@@H](C(=O)O)N	1
C01179	4-Hydroxyphenylpyruvic acid	HMDB0000707	979	C01179	C1=CC(=CC=C1CC(=O)C(=O)O)O	1
C05350	2-Hydroxy-3-(4-hydroxyphenyl)propenoic acid	HMDB0006915	636708	C05350	C1=CC(=CC=C1/C=C(/C(=O)O)\O)O	1
C01197	Caffeate	NA	4422	C01197	NA	1
C05610	Sinapoyl aldehyde	METPA0625	NA	C05610	NA	1
C00860	L-Histidinol	HMDB0003431	165271	C00860	C1=C(NC=N1)C[C@@H](CO)N	1
C00093	Glycerol 3-phosphate	HMDB0000126	439162	C00093	C([C@H](COP(=O)(O)O)O)O	1
C00843	(-)-Menthone	HMDB0035162	26447	C00843	C[C@@H]1CC[C@H](C(=O)C1)C(C)C	1
C11389	(R)-3,7-Dimethyl-1,6-octadien-3-ol	HMDB0036101	67179	C11389	CC(C)=CCC[C@](C)(O)C=C	1
C02693	1H-Indole-3-acetamide	HMDB0029739	397	C02693	C1=CC=C2C(=C1)C(=CN2)CC(=O)N	1
C00051	Glutathione	HMDB0062697	745	C00051	NC(CCC(O)=NC(CS)C(O)=NCC(O)=O)C(O)=O	1
C01304	2,5-Diamino-6-(5'-phosphoribosylamino)-4-pyrimidineone	METPA0171	NA	C01304	NA	1
C01100	L-Histidinol phosphate	METPA0128	NA	C01100	NA	1
C02947	4-Coumaroylshikimate	METPA1693	NA	C02947	NA	1
C00279	D-Erythrose 4-phosphate	HMDB0001321	122357	C00279	C([C@H]([C@H](C=O)O)O)OP(=O)(O)O	1
C08334	Lotaustralin	HMDB0033865	4626626	C08334	CCC(C)(C#N)OC1C(C(C(C(O1)CO)O)O)O	1
C00021	S-Adenosylhomocysteine	HMDB0000939	439155	C00021	C1=NC2=C(C(=N1)N)N=CN2[C@H]3[C@@H]([C@@H]([C@H](O3)CSCC[C@@H](C(=O)O)N)O)O	1
C05366	(+)-Pinoresinol	NA	7741	C05366	NA	1
C20455	(-)-Pinoresinol	NA	163312192	C20455	NA	1
C11811	1-Hydroxy-2-methyl-2-butenyl 4-diphosphate	METPA1056	NA	C11811	NA	1
C09833	Sakuranetin	HMDB0030090	73571	C09833	COC1=CC(=C2C(=O)C[C@H](OC2=C1)C3=CC=C(C=C3)O)O	1
C01262	Anserine	HMDB0000194	112072	C01262	CN1C=NC=C1C[C@@H](C(=O)O)NC(=O)CCN	1
C00257	Gluconic acid	HMDB0000625	10690	C00257	C([C@H]([C@H]([C@@H]([C@H](C(=O)O)O)O)O)O)O	1
C00800	Gulonic acid	HMDB0003290	152304	C00800	C([C@H]([C@@H]([C@H]([C@H](C(=O)O)O)O)O)O)O	1
C00398	Tryptamine	HMDB0000303	1150	C00398	C1=CC=C2C(=C1)C(=CN2)CCN	1
C16448	Dihydrozeatin-O-glucoside	NA	47205744	C16448	NA	1
C01159	2,3-Diphosphoglyceric acid	HMDB0001294	186004	C01159	C([C@H](C(=O)O)OP(=O)(O)O)OP(=O)(O)O	1
C00236	Glyceric acid 1,3-biphosphate	HMDB0001270	683	C00236	C(C(C(=O)OP(=O)(O)O)O)OP(=O)(O)O	1
C00415	Dihydrofolic acid	HMDB0001056	98792	C00415	C1C(=NC2=C(N1)NC(=NC2=O)N)CNC3=CC=C(C=C3)C(=O)N[C@@H](CCC(=O)O)C(=O)O	1
C16358	1-Methylxanthine	HMDB0010738	80220	C16358	CN1C(=O)C2=C(NC1=O)N=CN2	1
C16353	7-Methylxanthine	HMDB0001991	68374	C16353	CN1C=NC2=C1C(=O)NC(=O)N2	1
C00526	Deoxyuridine	HMDB0000012	13712	C00526	C1[C@@H]([C@H](O[C@H]1N2C=CC(=O)NC2=O)CO)O	1
C03838	Glycineamideribotide	HMDB0002022	5459918	C03838	C([C@@H]1[C@H]([C@H]([C@@H](O1)NC(=O)CN)O)O)OP(=O)(O)O	1
C11873	ent-16-Kauren-19-al	HMDB0036728	0	C11873	CC1(CCCC2(C)C3CCC4CC3(CC4=C)CCC12)C=O	1
C01107	Mevalonic acid-5P	HMDB0001343	439400	C01107	C[C@@](CCOP(=O)(O)O)(CC(=O)O)O	1
C02273	Digalacturonic acid	HMDB0039721	6857565	C02273	OC1OC(C(OC2OC(C(O)C(O)C2O)C(O)=O)C(O)C1O)C(O)=O	1
C00003	NAD	HMDB0000902	5893	C00003	C1=CC(=C[N+](=C1)[C@H]2[C@@H]([C@@H]([C@H](O2)COP(=O)(O)OP(=O)(O)OC[C@@H]3[C@H]([C@H]([C@@H](O3)N4C=NC5=C4N=CN=C5N)O)O)O)O)C(=O)N	1
C18218	16-Hydroxy hexadecanoic acid	HMDB0006294	7058075	C18218	C(CCCCCCCC(=O)[O-])CCCCCCCO	1
C11876	(ent-6alpha,7alpha)-6,7-Dihydroxy-16-kauren-19-oic acid	HMDB0036763	0	C11876	CC12CCCC(C)(C1C(O)C(O)C13CC(CCC21)C(=C)C3)C(O)=O	1
C04133	N-Acetyl-L-glutamyl 5-phosphate	HMDB0006456	440236	C04133	CC(=O)N[C@@H](CCC(=O)OP(=O)(O)O)C(=O)O	1
C00140	N-Acetyl-D-glucosamine	HMDB0000215	439174	C00140	CC(=O)N[C@@H]1[C@H]([C@@H]([C@H](OC1O)CO)O)O	1
C00250	Pyridoxal	HMDB0001545	1050	C00250	CC1=NC=C(C(=C1O)C=O)CO	1
C17758	4,5-seco-Dopa	NA	96024085	C17758	NA	1
C00329	Glucosamine	HMDB0001514	439213	C00329	C([C@@H]1[C@H]([C@@H]([C@H](C(O1)O)N)O)O)O	1
C01929	Histidinal	HMDB0012234	775	C01929	C1=C(NC=N1)CC(C=O)N	1
C01279	4-Amino-5-hydroxymethyl-2-methylpyrimidine	METPA0166	NA	C01279	NA	1
C00153	Niacinamide	HMDB0001406	936	C00153	C1=CC(=CN=C1)C(=O)N	1
C02739	Phosphoribosyl-ATP	HMDB0003665	16019963	C02739	C1=NC2=C(N1C3C(C(C(O3)COP(=O)(O)OP(=O)(O)OP(=O)(O)O)O)O)N=C[N+](=C2N)C4C(C(C(O4)COP(=O)(O)O)O)O	1
C03451	S-Lactoylglutathione	HMDB0001066	440018	C03451	C[C@H](C(=O)SC[C@@H](C(=O)NCC(=O)O)NC(=O)CC[C@@H](C(=O)O)N)O	1
C12138	Delphinidin 3-O-beta-D-glucoside	HMDB0037997	443650	C12138	OC[C@H]1O[C@@H](OC2=CC3=C(C=C(O)C=C3O)[O+]=C2C2=CC(O)=C(O)C(O)=C2)[C@H](O)[C@@H](O)[C@@H]1O	1
C10646	Lariciresinol	NA	12829	C10646	NA	1
C20454	(-)-Lariciresinol	NA	163312191	C20454	NA	1
C16430	trans-Zeatin riboside monophosphate	METPA1690	NA	C16430	NA	1
C05623	Quercetin 3-glucoside	HMDB0037362	5280804	C05623	OC[C@H]1O[C@@H](OC2=C(OC3=C(C(O)=CC(O)=C3)C2=O)C2=CC=C(O)C(O)=C2)[C@H](O)[C@@H](O)[C@@H]1O	1
C00389	Quercetin	HMDB0005794	5280343	C00389	C1=CC(=C(C=C1C2=C(C(=O)C3=C(C=C(C=C3O2)O)O)O)O)O	1
C01674	Chitobiose	HMDB0003556	22833609	C01674	CC(=O)N[C@@H]1[C@H]([C@@H]([C@H](O[C@H]1O)CO)O[C@H]2[C@@H]([C@H]([C@@H]([C@H](O2)CO)O)O)NC(=O)O)O	1
C08580	Astaxanthin	HMDB0002204	5281224	C08580	CC1=C(C(C[C@@H](C1=O)O)(C)C)/C=C/C(=C/C=C/C(=C/C=C/C=C(/C=C/C=C(/C=C/C2=C(C(=O)[C@H](CC2(C)C)O)C)\C)\C)/C)/C	1
C22119	3beta-Hydroxyergosta-7,24(24(1))-dien-4alpha-carboxylate	NA	NA	C22119	NA	1
C00705	dCDP	HMDB0001245	150855	C00705	C1[C@@H]([C@H](O[C@H]1N2C=CC(=NC2=O)N)COP(=O)(O)OP(=O)(O)O)O	1
C02139	Chlorophyllide	METPA0252	NA	C02139	NA	1
C11829	13(1)-Hydroxy-magnesium-protoporphyrin IX 13-monomethyl ester	METPA1059	NA	C11829	NA	1
C05382	D-Sedoheptulose 7-phosphate	HMDB0001068	22833559	C05382	C([C@@H]1[C@H]([C@H]([C@@H](C(O1)(CO)O)O)O)O)OP(=O)(O)O	1
C00670	Glycerophosphocholine	HMDB0000086	71920	C00670	C[N+](C)(C)CCOP(=O)([O-])OC[C@H](CO)O	1
C00475	Cytidine	HMDB0000089	6253	C00475	C1=CN(C(=O)N=C1N)[C@H]2[C@@H]([C@@H]([C@H](O2)CO)O)O	1
C05711	gamma-Glutamyl-beta-cyanoalanine	HMDB0060478	53297342	C05711	N[C@@H](CCC(O)=N[C@@H](CC#N)C(O)=O)C(O)=O	1
C00164	Acetoacetic acid	HMDB0000060	96	C00164	CC(=O)CC(=O)O	1
C00232	Succinic acid semialdehyde	HMDB0001259	1112	C00232	C(CC(=O)O)C=O	1
C00188	L-Threonine	HMDB0000167	6288	C00188	C[C@H]([C@@H](C(=O)O)N)O	1
C00263	L-Homoserine	HMDB0000719	12647	C00263	C(CO)[C@@H](C(=O)O)N	1
C05519	L-Allothreonine	HMDB0004041	99289	C05519	C[C@@H]([C@@H](C(=O)O)N)O	1
C00109	2-Ketobutyric acid	HMDB0000005	58	C00109	CCC(=O)C(=O)O	1
C06002	(S)-Methylmalonic acid semialdehyde	HMDB0002217	5462303	C06002	C[C@@H](C=O)C(=O)O	1
C00349	2-Methyl-3-oxopropanoic acid	HMDB0001172	296	C00349	CC(C=O)C(=O)O	1
C00631	2-Phospho-D-glyceric acid	HMDB0003391	439278	C00631	C([C@H](C(=O)O)OP(=O)(O)O)O	1
C00197	3-Phosphoglyceric acid	HMDB0060180	439183	C00197	O[C@H](COP(O)(O)=O)C(O)=O	1
C02226	Citraconic acid	HMDB0000634	643798	C02226	C/C(=C/C(=O)O)/C(=O)O	1
C06032	D-erythro-3-Methylmalate	METPA0739	NA	C06032	NA	1
C04236	2-Isopropyl-3-oxosuccinate	HMDB0012149	5462259	C04236	CC(C)[C@@H](C(=O)C(=O)O)C(=O)O	1
C00493	Shikimic acid	HMDB0003070	8742	C00493	C1[C@H]([C@@H]([C@@H](C=C1C(=O)O)O)O)O	1
C02630	2-Hydroxyglutarate	HMDB0059655	43	C02630	OC(CCC(O)=O)C(O)=O	1
C00760	Galabiose	HMDB0029902	53477911	C00760	OCC1OC(OC2C(O)C(O)C(O)OC2CO)C(O)C(O)C1O	1
C15545	cis-Zeatin	METPA1828	NA	C15545	NA	1
C09826	Pinobanksin	METPA1712	NA	C09826	NA	1
C03160	2-Succinylbenzoyl-CoA	METPA0365	NA	C03160	NA	1
C01598	Melatonin	HMDB0001389	896	C01598	CC(=O)NCCC1=CNC2=C1C=C(C=C2)OC	1
C01081	Thiamine monophosphate	HMDB0002666	3382778	C01081	CC1=C(SC=[N+]1CC2=CN=C(N=C2N)C)CCOP(=O)(O)[O-]	1
C02666	Coniferyl aldehyde	METPA0314	NA	C02666	NA	1
C03175	Shikimate 3-phosphate	METPA0369	NA	C03175	NA	1
C05379	Oxalosuccinic acid	HMDB0003974	972	C05379	C(C(C(=O)C(=O)O)C(=O)O)C(=O)O	1
C00242	Guanine	HMDB0000132	764	C00242	C1=NC2=C(N1)C(=O)N=C(N2)N	1
C00065	L-Serine	HMDB0000187	5951	C00065	C([C@@H](C(=O)O)N)O	1
C00740	D-Serine	HMDB0003406	71077	C00740	C([C@H](C(=O)O)N)O	1
C00383	Malonate	NA	3673	C00383	NA	1
C04332	6,7-Dimethyl-8-(1-D-ribityl)lumazine	HMDB0003826	672	C04332	CC1=C(N(C2=NC(=O)NC(=O)C2=N1)CC(C(C(CO)O)O)O)C	1
C03516	Magnesium protoporphyrin	METPA0404	NA	C03516	NA	1
C01019	L-Fucose	HMDB0000174	25310	C01019	C[C@H]1[C@H]([C@H]([C@@H](C(O1)O)O)O)O	1
C04785	13(S)-HPOT	METPA0543	NA	C04785	NA	1
C00559	Deoxyadenosine	HMDB0000101	13730	C00559	C1[C@@H]([C@H](O[C@H]1N2C=NC3=C2N=CN=C3N)CO)O	1
C01909	Dethiobiotin	HMDB0003581	445027	C01909	C[C@H]1[C@H](NC(=O)N1)CCCCCC(=O)O	1
C00141	Alpha-ketoisovaleric acid	HMDB0000019	49	C00141	CC(C)C(=O)C(=O)O	1
C02291	L-Cystathionine	HMDB0000099	439258	C02291	C(CSC[C@@H](C(=O)O)N)[C@@H](C(=O)O)N	1
C05265	3-Oxodecanoyl-CoA	HMDB0003939	440606	C05265	CCCCCCCC(=O)CC(=O)SCCNC(=O)CCNC(=O)C(C(C)(C)COP(=O)(O)OP(=O)(O)OC[C@@H]1[C@H]([C@H]([C@@H](O1)N2C=NC3=C2N=CN=C3N)O)OP(=O)(O)O)O	1
C11947	3-Hydroxy-2,6-dimethyl-5-methylene-heptanoyl-CoA	HMDB0004601	9543313	C11947	CC(C)C(=C)CC(C(C)C(=O)SCCNC(=O)CCNC(=O)[C@@H](C(C)(C)COP(=O)(O)OP(=O)(O)OC[C@@H]1[C@H]([C@H]([C@@H](O1)N2C=NC3=C2N=CN=C3N)O)OP(=O)(O)O)O)O	1
C00783	Tropinone	METPA0078	NA	C00783	NA	1
C03232	Phosphohydroxypyruvic acid	HMDB0001024	105	C03232	C(C(=O)C(=O)O)OP(=O)(O)O	1
C05619	3-(3,4-Dihydroxy-5-methoxy)-2-propenoic acid	HMDB0035484	446834	C05619	COC1=CC(=CC(=C1O)O)/C=C/C(=O)O	1
C00669	gamma-Glutamylcysteine	HMDB0001049	123938	C00669	C(CC(=O)N[C@@H](CS)C(=O)O)[C@@H](C(=O)O)N	1
C00029	Uridine diphosphate glucose	HMDB0000286	53477679	C00029	C1=CN(C(=O)NC1=O)[C@@H]2[C@H]([C@H]([C@@H](O2)COP(=O)(O)OP(=O)(O)OC3[C@H]([C@@H]([C@H]([C@@H](O3)CO)O)O)O)O)O	1
C00052	Uridine diphosphategalactose	HMDB0000302	18068	C00052	C1=CN(C(=O)NC1=O)[C@H]2[C@@H]([C@@H]([C@H](O2)COP(=O)(O)OP(=O)(O)O[C@@H]3[C@@H]([C@H]([C@H]([C@H](O3)CO)O)O)O)O)O	1
C11453	2-C-Methyl-D-erythritol 2,4-cyclodiphosphate	METPA1030	NA	C11453	NA	1
C06429	Docosahexaenoic acid	HMDB0002183	445580	C06429	CC/C=C\C/C=C\C/C=C\C/C=C\C/C=C\C/C=C\CCC(=O)O	1
C00534	Pyridoxamine	HMDB0001431	1052	C00534	CC1=NC=C(C(=C1O)CN)CO	1
C00101	Tetrahydrofolic acid	HMDB0001846	5280320	C00101	C1C(NC2=C(N1)NC(=NC2=O)N)CNC3=CC=C(C=C3)C(=O)N[C@@H](CCC(=O)O)C(=O)O	1
C15546	Cis-zeatin-O-glucoside	HMDB0012203	6250	C15546	C/C(=C\CNC1=NC=NC2=C1NC=N2)/CO[C@@H]3[C@@H]([C@H]([C@@H]([C@H](O3)CO)O)O)O	1
C01571	Capric acid	HMDB0000511	2969	C01571	CCCCCCCCCC(=O)O	1
C15792	3-Dehydroteasterone	NA	47205117	C15792	NA	1
C05819	Menaquinol	HMDB0060487	5280839	C05819	CC(C)=CCC\C(C)=C\CC1=C(O)C2=CC=CC=C2C(O)=C1C	1
C02191	Protoporphyrin IX	HMDB0000241	NA	C02191	CC1=C(CCC(O)=O)/C2=C/C3=N/C(=C\C4=C(C)C(C=C)=C(N4)/C=C4\N=C(\C=C\1/N\2)C(C=C)=C4C)/C(C)=C3CCC(O)=O	1
C05839	cis-beta-D-Glucosyl-2-hydroxycinnamate	HMDB0060077	5316113	C05839	OC[C@H]1O[C@@H](OC2=CC=CC=C2\C=C/C(O)=O)[C@H](O)[C@@H](O)[C@@H]1O	1
C00118	D-Glyceraldehyde 3-phosphate	HMDB0001112	729	C00118	C(C(C=O)O)OP(=O)(O)O	1
C00111	Dihydroxyacetone phosphate	HMDB0001473	668	C00111	C(C(=O)COP(=O)(O)O)O	1
C00940	2-Keto-glutaramic acid	HMDB0001552	48	C00940	C(CC(=O)N)C(=O)C(=O)O	1
C00637	Indoleacetaldehyde	HMDB0001190	800	C00637	C1=CC=C2C(=C1)C(=CN2)CC=O	1
C05527	3-Sulfinylpyruvic acid	HMDB0001405	6398963	C05527	C(C(=O)C(=O)O)S(=O)[O-]	1
C00221	D-Glucose	HMDB0000122	5793	C00221	C([C@@H]1[C@H]([C@@H]([C@H](C(O1)O)O)O)O)O	1
C00267	Alpha-D-Glucose	HMDB0003345	79025	C00267	C([C@@H]1[C@H]([C@@H]([C@H]([C@H](O1)O)O)O)O)O	1
C01801	Deoxyribose	HMDB0003224	22833604	C01801	C1[C@H]([C@@H](O[C@@H]1O)CO)O	1
C00159	D-Mannose	HMDB0000169	18950	C00159	C([C@@H]1[C@H]([C@@H]([C@@H](C(O1)O)O)O)O)O	1
C00095	D-Fructose	NA	3395	C00095	NA	1
C00124	D-Galactose	NA	3424	C00124	NA	1
C00031	D-Glucose	HMDB0000122	5793	C00031	C([C@@H]1[C@H]([C@@H]([C@H](C(O1)O)O)O)O)O	1
C00137	myo-Inositol	HMDB0000211	NA	C00137	O[C@H]1[C@H](O)[C@@H](O)[C@H](O)[C@H](O)[C@@H]1O	1
C00984	D-Galactose	HMDB0000143	439357	C00984	C([C@@H]1[C@@H]([C@@H]([C@H]([C@H](O1)O)O)O)O)O	1
C01825	L-Galactose	HMDB0033704	6036	C01825	C([C@H]1[C@H]([C@H]([C@@H](C(O1)O)O)O)O)O	1
C04272	(R)-2,3-Dihydroxy-isovalerate	HMDB0012141	440279	C04272	CC(C)([C@H](C(=O)O)O)O	1
C02336	D-Fructose	HMDB0000660	439709	C02336	C([C@@H]1[C@H]([C@@H]([C@](O1)(CO)O)O)O)O	1
C20121	trans,trans-Farnesyl phosphate	NA	135626581	C20121	NA	1
C15978	2-Methyl-1-hydroxybutyl-ThPP	HMDB0012310	23724627	C15978	CC[C@H](C)C(C1=[N+](C(=C(S1)CCOP(=O)(O)OP(=O)(O)O)C)CC2=CN=C(N=C2N)C)O	1
C15974	3-Methyl-1-hydroxybutyl-ThPP	HMDB0006865	23724625	C15974	CC1=C(SC(=[N+]1CC2=CN=C(N=C2N)C)C(CC(C)C)O)CCOP(=O)(O)OP(=O)(O)O	1
C03972	Tetrahydrodipicolinate	HMDB0012289	632	C03972	C1CC(N=C(C1)C(=O)O)C(=O)O	1
C00366	Uric acid	HMDB0000289	1175	C00366	C12=C(NC(=O)N1)NC(=O)NC2=O	1
C00445	5,10-Methenyltetrahydrofolic acid	HMDB0001354	644350	C00445	C1[C@@H]2CN(C=[N+]2C3=C(N1)NC(=NC3=O)N)C4=CC=C(C=C4)C(=O)N[C@@H](CCC(=O)O)C(=O)[O-]	1
C03479	Folinic acid	HMDB0001562	143	C03479	C1C(N(C2=C(N1)NC(=NC2=O)N)C=O)CNC3=CC=C(C=C3)C(=O)NC(CCC(=O)O)C(=O)O	1
C00234	10-Formyltetrahydrofolate	HMDB0000972	135450591	C00234	C1C(NC2=C(N1)NC(=NC2=O)N)CN(C=O)C3=CC=C(C=C3)C(=O)N[C@@H](CCC(=O)O)C(=O)O	1
C16322	9-Oxononanoic acid	METPA1279	NA	C16322	NA	1
C05345	Beta-D-Fructose 6-phosphate	HMDB0003971	440641	C05345	C([C@@H]1[C@H]([C@@H]([C@](O1)(CO)O)O)O)OP(=O)(O)O	1
C00668	Glucose 6-phosphate	HMDB0001401	5958	C00668	OC1O[C@H](COP(O)(O)=O)[C@@H](O)[C@H](O)[C@H]1O	1
C00103	Glucose 1-phosphate	HMDB0001586	439165	C00103	C([C@@H]1[C@H]([C@@H]([C@H](C(O1)OP(=O)(O)O)O)O)O)O	1
C01172	Beta-D-Glucose 6-phosphate	HMDB0003498	439427	C01172	C([C@@H]1[C@H]([C@@H]([C@H]([C@@H](O1)O)O)O)O)OP(=O)(O)O	1
C00275	Mannose 6-phosphate	HMDB0001078	439198	C00275	C([C@@H]1[C@H]([C@@H]([C@@H]([C@@H](O1)O)O)O)O)OP(=O)(O)O	1
C00636	D-Mannose 1-phosphate	HMDB0006330	644175	C00636	C([C@@H]1[C@H]([C@@H]([C@@H](C(O1)OP(=O)(O)O)O)O)O)O	1
C01094	3a,6b,7a,12a-Tetrahydroxy-5b-cholanoic acid	HMDB0000399	5283899	C01094	C[C@H](CCC(=O)O)[C@H]1CC[C@@H]2[C@@]1([C@H](C[C@H]3[C@H]2[C@@H]([C@H]([C@H]4[C@@]3(CC[C@H](C4)O)C)O)O)O)C	1
C01097	D-Tagatose 6-phosphate	HMDB0006873	439396	C01097	C([C@@H]1[C@@H]([C@@H](C(O1)(CO)O)O)O)OP(=O)(O)O	1
C00446	Galactose 1-phosphate	HMDB0000645	123912	C00446	C([C@@H]1[C@@H]([C@@H]([C@H]([C@H](O1)OP(=O)(O)O)O)O)O)O	1
C15926	L-Galactose 1-phosphate	METPA1227	NA	C15926	NA	1
C00092	Glucose 6-phosphate	HMDB0001401	5958	C00092	C([C@@H]1[C@H]([C@@H]([C@H](C(O1)O)O)O)O)OP(=O)(O)O	1
C00085	Fructose 6-phosphate	HMDB0000124	69507	C00085	C([C@H]([C@H]([C@@H](C(=O)CO)O)O)O)OP(=O)(O)O	1
C03862	Dolichyl phosphate D-mannose	HMDB0000994	3246168	C03862	C([C@@H]1[C@H]([C@@H]([C@@H]([C@@H](O1)OP(=O)(O)O)O)O)O)O	1
C03546	D-Myo-inositol 4-phosphate	HMDB0001313	440043	C03546	O[C@@H]1[C@H](O)[C@H](O)[C@@H](OP(O)(O)=O)[C@H](O)[C@H]1O	1
C04006	1D-myo-Inositol 3-phosphate	HMDB0006814	440194	C04006	[C@H]1([C@@H](C([C@H]([C@@H](C1O)O)O)OP(=O)(O)O)O)O	1
C01177	Myo-inositol 1-phosphate	HMDB0000213	NA	C01177	O[C@H]1[C@H](O)[C@H](O)[C@H](OP(O)(O)=O)[C@@H](O)[C@@H]1O	1
C05625	Rutin	HMDB0003249	5280805	C05625	C[C@H]1[C@@H]([C@H]([C@H]([C@@H](O1)OC[C@@H]2[C@H]([C@@H]([C@H]([C@@H](O2)OC3=C(OC4=CC(=CC(=C4C3=O)O)O)C5=CC(=C(C=C5)O)O)O)O)O)O)O)O	1
C19796	Quercetin 3-O-rhamnoside 7-O-glucoside	NA	135626263	C19796	NA	1
C00148	L-Proline	HMDB0000162	145742	C00148	C1C[C@H](NC1)C(=O)O	1
C05143	Dhurrin	HMDB0060471	161355	C05143	OC[C@H]1O[C@@H](O[C@H](C#N)C2=CC=C(O)C=C2)[C@H](O)[C@@H](O)[C@@H]1O	1
C03090	5-Phosphoribosylamine	HMDB0001128	439905	C03090	C([C@@H]1[C@H]([C@H]([C@@H](O1)N)O)O)OP(=O)(O)O	1
C00255	Riboflavin	HMDB0000244	493570	C00255	CC1=CC2=C(C=C1C)N(C3=NC(=O)NC(=O)C3=N2)C[C@@H]([C@@H]([C@@H](CO)O)O)O	1
C00931	Porphobilinogen	HMDB0000245	1021	C00931	C1=C(C(=C(N1)CN)CC(=O)O)CCC(=O)O	1
C05635	5-Hydroxyindoleacetic acid	HMDB0000763	1826	C05635	C1=CC2=C(C=C1O)C(=CN2)CC(=O)O	1
C00826	L-Arogenate	METPA0086	NA	C00826	NA	1
C00143	5,10-Methylene-THF	HMDB0001533	439175	C00143	C1[C@@H]2CN(CN2C3=C(N1)NC(=NC3=O)N)C4=CC=C(C=C4)C(=O)NC(CCC(=O)O)C(=O)O	1
C05906	Leucocyanidin	METPA1714	NA	C05906	NA	1
C12136	(-)-Epigallocatechin	HMDB0038361	72277	C12136	O[C@@H]1CC2=C(O)C=C(O)C=C2O[C@@H]1C1=CC(O)=C(O)C(O)=C1	1
C12127	(+)-Gallocatechin	HMDB0038365	65084	C12127	O[C@H]1CC2=C(O)C=C(O)C=C2O[C@@H]1C1=CC(O)=C(O)C(O)=C1	1
C06118	4-(4-Deoxy-alpha-D-gluc-4-enuronosyl)-D-galacturonate	METPA0762	NA	C06118	NA	1
C05841	Nicotinate D-ribonucleoside	HMDB0006809	161234	C05841	C1=CC(=C[N+](=C1)[C@H]2[C@@H]([C@@H]([C@H](O2)CO)O)O)C(=O)O	1
C00482	Sinapic acid	HMDB0032616	637775	C00482	COC1=CC(=CC(=C1O)OC)/C=C/C(=O)O	1
C09762	(2S)-Liquiritigenin	HMDB0029519	1889	C09762	C1C(OC2=C(C1=O)C=CC(=C2)O)C3=CC=C(C=C3)O	1
C09827	(S)-Pinocembrin	HMDB0030808	238782	C09827	C1C(OC2=CC(=CC(=C2C1=O)O)O)C3=CC=CC=C3	1
C16404	Pinocembrin chalcone	METPA1721	NA	C16404	NA	1
C08650	Isoliquiritigenin	HMDB0037316	638278	C08650	OC1=CC=C(\C=C\C(=O)C2=C(O)C=C(O)C=C2)C=C1	1
C00121	D-Ribose	HMDB0000283	5779	C00121	C([C@@H]1[C@H]([C@H](C(O1)O)O)O)O	1
C00309	D-Ribulose	HMDB0000621	151261	C00309	C([C@H]([C@H](C(=O)CO)O)O)O	1
C00310	D-Xylulose	HMDB0001644	5289590	C00310	C([C@H]([C@@H](C(=O)CO)O)O)O	1
C00181	D-Xylose	HMDB0000098	135191	C00181	C1[C@H]([C@@H]([C@H](C(O1)O)O)O)O	1
C00333	D-Galacturonate	NA	3627	C00333	NA	1
C04181	3-Hydroxy-3-methyl-2-oxobutanoic acid	METPA0472	NA	C04181	NA	1
C00450	(S)-2,3,4,5-Tetrahydropiperidine-2-carboxylate	HMDB0012130	165067	C00450	C1CC=NC(C1)C(=O)O	1
C00259	L-Arabinose	HMDB0000646	439195	C00259	C1[C@@H]([C@@H]([C@H](C(O1)O)O)O)O	1
C00378	Thiamine	HMDB0000235	1130	C00378	CC1=C(SC=[N+]1CC2=CN=C(N=C2N)C)CCO	1
C03648	cis-3 and trans-2-Hexenyl propionate	HMDB0032322	440073	C03648	C1=CC(=CC=C1[C@@H]2[C@H]([C@H](C3=C(C=C(C=C3O2)O)O)O)O)O	1
C09727	Epicatechin	HMDB0001871	72276	C09727	C1[C@H]([C@H](OC2=CC(=CC(=C21)O)O)C3=CC(=C(C=C3)O)O)O	1
C06562	Catechin	HMDB0002780	9064	C06562	C1[C@@H]([C@H](OC2=CC(=CC(=C21)O)O)C3=CC(=C(C=C3)O)O)O	1
C00438	Ureidosuccinic acid	HMDB0000828	93072	C00438	C([C@@H](C(=O)O)NC(=O)N)C(=O)O	1
C00337	4,5-Dihydroorotic acid	HMDB0000528	648	C00337	C1C(NC(=O)NC1=O)C(=O)O	1
C04742	15(S)-HETE	HMDB0003876	9966861	C04742	CCCCC[C@@H](/C=C/C=C\C/C=C\C/C=C\CCCC(=O)O)O	1
C04805	5-HETE	HMDB0011134	5280733	C04805	CCCCC/C=C\C/C=C\C/C=C\C=C\[C@H](CCCC(=O)O)O	1
C00219	Arachidonic acid	HMDB0001043	444899	C00219	CCCCC/C=C\C/C=C\C/C=C\C/C=C\CCCC(=O)O	1
C21831	ent-2alpha,3alpha-Dihydroxyisokaurene	NA	NA	C21831	NA	1
C21562	Oryzalexin D	NA	336445200	C21562	NA	1
C21561	Oryzalexin E	NA	336445199	C21561	NA	1
C04874	7,8-Dihydroneopterin	HMDB0002275	659	C04874	C1C(=NC2=C(N1)NC(=NC2=O)N)C(C(CO)O)O	1
C11039	2'-Deoxy-5-hydroxymethylcytidine-5'-triphosphate	METPA0985	NA	C11039	NA	1
C00818	Glucaric acid	HMDB0000663	33037	C00818	[C@H]([C@@H]([C@@H](C(=O)O)O)O)([C@H](C(=O)O)O)O	1
C01250	N-Acetyl-L-glutamate 5-semialdehyde	HMDB0006488	192878	C01250	CC(=O)N[C@@H](CCC=O)C(=O)O	1
C01036	Maleylacetoacetic acid	HMDB0002052	5280398	C01036	C(C(=O)CC(=O)O)C(=O)/C=C\C(=O)O	1
C01120	Sphinganine 1-phosphate	HMDB0001383	644260	C01120	CCCCCCCCCCCCCCC[C@H]([C@H](COP(=O)(O)O)N)O	1
C06124	Sphingosine 1-phosphate	HMDB0000277	5353956	C06124	CCCCCCCCCCCCC/C=C/C(C(COP(=O)(O)O)N)O	1
C03657	1,4-Dihydroxy-2-naphthoate	METPA0422	NA	C03657	NA	1
C00627	Pyridoxine 5'-phosphate	HMDB0001319	1055	C00627	CC1=NC=C(C(=C1O)CO)COP(=O)(O)O	1
C01246	Dolichyl b-D-glucosyl phosphate	HMDB0001054	22833557	C01246	CC(CC/C=C(/C)\CCC=C(C)C)CCOP(=O)(O)O[C@H]1[C@@H]([C@H]([C@@H]([C@H](O1)CO)O)O)O	1
C02035	Gibberellin A20	METPA0241	NA	C02035	NA	1
C11864	Gibberellin A4	METPA1645	NA	C11864	NA	1
C11865	Gibberellin A51	HMDB0035041	13964928	C11865	CC12CC(O)CC3(OC1=O)C1CCC4CC1(CC4=C)C(C23)C(O)=O	1
C05844	5-L-Glutamyl-taurine	HMDB0004195	68759	C05844	C(CC(=O)NCCS(=O)(=O)O)[C@@H](C(=O)O)N	1
C03582	Resveratrol	HMDB0003747	445154	C03582	C1=CC(=CC=C1/C=C/C2=CC(=CC(=C2)O)O)O	1
C00643	5-Hydroxy-L-tryptophan	HMDB0000472	144	C00643	C1=CC2=C(C=C1O)C(=CN2)CC(C(=O)O)N	1
C00117	D-Ribose 5-phosphate	HMDB0001548	439167	C00117	C([C@@H]1[C@H]([C@H](C(O1)O)O)O)OP(=O)(O)O	1
C00199	D-Ribulose 5-phosphate	HMDB0000618	439184	C00199	C([C@H]([C@H](C(=O)CO)O)O)OP(=O)(O)O	1
C00620	Ribose 1-phosphate	HMDB0001489	439236	C00620	C([C@@H]1[C@H]([C@H]([C@H](O1)OP(=O)(O)O)O)O)O	1
C00231	Xylulose 5-phosphate	HMDB0000868	439190	C00231	C([C@H]([C@@H](C(=O)CO)O)O)OP(=O)(O)O	1
C03906	Beta-L-arabinose 1-phosphate	HMDB0012195	440160	C03906	C1[C@@H]([C@@H]([C@H]([C@H](O1)OP(=O)(O)O)O)O)O	1
C11512	Methyl jasmonate	HMDB0036583	5367719	C11512	CC\C=C/C[C@@H]1[C@@H](CC(=O)OC)CCC1=O	1
C09332	Tetrahydrofolyl-[Glu](2)	HMDB0006825	442163	C09332	C1C(NC2=C(N1)NC(=NC2=O)N)CNC3=CC=C(C=C3)C(=O)NC(CCC(=O)NC(CCC(=O)O)C(=O)O)C(=O)O	1
C00423	trans-Cinnamate	NA	3713	C00423	NA	1
C05608	(E)-3-(4-Hydroxyphenyl)-2-propenal	HMDB0040986	641301	C05608	OC1=CC=C(\C=C\C=O)C=C1	1
C21028	(R)-5,6-Dihydrothymine	NA	254816253	C21028	NA	1
C05715	gamma-Amino-gamma-cyanobutanoate	METPA0649	NA	C05715	NA	1
C00025	L-Glutamic acid	HMDB0000148	33032	C00025	C(CC(=O)O)[C@@H](C(=O)O)N	1
C00979	O-Acetylserine	HMDB0003011	99478	C00979	CC(=O)OC[C@@H](C(=O)O)N	1
C05938	L-4-Hydroxyglutamate semialdehyde	HMDB0006556	440851	C05938	C([C@H](C=O)O)[C@@H](C(=O)O)N	1
C04281	Pyrroline hydroxycarboxylic acid	HMDB0001369	1059	C04281	C1C(C=NC1C(=O)O)O	1
C00302	DL-Glutamate	HMDB0060475	611	C00302	NC(CCC(O)=O)C(O)=O	1
C01879	Pyroglutamic acid	HMDB0000267	7405	C01879	C1CC(=O)N[C@@H]1C(=O)O	1
G00093	NA	NA	NA	NA	NA	0
C08814	Brassinolide	NA	11007	C08814	NA	1
C19873	26-Hydroxycastasterone	NA	135626339	C19873	NA	1
C16359	1-Methyluric acid	HMDB0003099	69726	C16359	CN1C(=O)C2=C(NC(=O)N2)NC1=O	1
C16355	7-Methyluric acid	HMDB0011107	69160	C16355	CN1C2=C(NC(=O)NC2=O)NC1=O	1
C00436	N-Carbamoylputrescine	HMDB0033458	502	C00436	C(CCNC(=O)N)CN	1
C00461	Chitin	HMDB0003362	21252321	C00461	CC(=O)NC1[C@@H](OC([C@H]([C@@H]1O)COC[C@H]2C([C@H]([C@@H](C(O2)CO)O)O)NC(=O)C)CO)COC[C@H]3[C@@H](C([C@@H](OC3CO)O)NC(=O)C)O	1
C11436	2-Phospho-4-(cytidine 5'-diphospho)-2-C-methyl-D-erythritol	METPA1029	NA	C11436	NA	1
C00603	(S)-Ureidoglycolic acid	HMDB0001005	439269	C00603	[C@H](C(=O)O)(NC(=O)N)O	1
C00455	Nicotinamide ribotide	HMDB0000229	14180	C00455	C1=CC(=C[N+](=C1)[C@H]2[C@@H]([C@@H]([C@H](O2)COP(=O)(O)[O-])O)O)C(=O)N	1
C04752	2-Methyl-4-amino-5-hydroxymethylpyrimidine diphosphate	METPA0538	NA	C04752	NA	1
C00680	meso-2,6-Diaminoheptanedioate	HMDB0001370	99290	C00680	N[C@@H](CCC[C@H](N)C(O)=O)C(O)=O	1
C00427	Prostaglandin H2	HMDB0001381	445049	C00427	CCCCC[C@@H](/C=C/[C@H]1[C@H]2C[C@@H]([C@@H]1C/C=C\CCCC(=O)O)OO2)O	1
C00584	Prostaglandin E2	HMDB0001220	5283116	C00584	CCCCC[C@@H](/C=C/[C@H]1[C@@H](CC(=O)[C@@H]1C/C=C\CCCC(=O)O)O)O	1
C01189	Lathosterol	HMDB0001170	65728	C01189	C[C@H](CCCC(C)C)[C@H]1CC[C@@H]2[C@@]1(CC[C@H]3C2=CC[C@@H]4[C@@]3(CC[C@@H](C4)O)C)C	1
C03845	5a-Cholest-8-en-3b-ol	HMDB0006841	101770	C03845	C[C@H](CCCC(C)C)[C@H]1CC[C@@H]2[C@@]1(CCC3=C2CC[C@@H]4[C@@]3(CC[C@@H](C4)O)C)C	1
C00187	Cholesterol	HMDB0000067	5997	C00187	C[C@H](CCCC(C)C)[C@H]1CC[C@@H]2[C@@]1(CC[C@H]3[C@H]2CC=C4[C@@]3(CCC(C4)O)C)C	1
C01346	dUDP	HMDB0001000	145729	C01346	C1[C@@H]([C@H](O[C@H]1N2C=CC(=O)NC2=O)COP(=O)(O)OP(=O)(O)O)O	1
C00364	5-Thymidylic acid	HMDB0001227	9700	C00364	CC1=CN(C(=O)NC1=O)[C@H]2C[C@@H]([C@H](O2)COP(=O)(O)O)O	1
C00055	Cytidine monophosphate	HMDB0000095	8117	C00055	C1=CN(C(=O)N=C1N)[C@H]2[C@@H]([C@@H]([C@H](O2)COP(=O)(O)O)O)O	1
C00005	NADPH	HMDB0000221	22833512	C00005	C1C=CN(C=C1C(=O)N)[C@@H]2[C@H]([C@H]([C@@H](O2)COP(=O)(O)OP(=O)(O)OC[C@H]3[C@@H]([C@@H]([C@H](O3)N4C=NC5=C4N=CN=C5N)OP(=O)(O)O)O)O)O	1
C11038	2'-Deoxy-5-hydroxymethylcytidine-5'-diphosphate	METPA0984	NA	C11038	NA	1
C16688	Sucrose-6-phosphate	METPA1419	NA	C16688	NA	1
C02591	Sucrose 6-phosphate	METPA0307	NA	C02591	NA	1
C00689	Trehalose 6-phosphate	HMDB0001124	122336	C00689	C([C@@H]1[C@H]([C@@H]([C@H]([C@H](O1)O[C@@H]2[C@@H]([C@H]([C@@H]([C@H](O2)COP(=O)(O)O)O)O)O)O)O)O)O	1
G00001	NA	NA	NA	NA	NA	0
G00143	(GlcNAc)1 (Ino-P)1	METPA1581	NA	G00143	NA	1
C16311	12-Oxo-9(Z)-dodecenoic acid	METPA1275	NA	C16311	NA	1
C00078	L-Tryptophan	HMDB0000929	6305	C00078	C1=CC=C2C(=C1)C(=CN2)C[C@@H](C(=O)O)N	1
C01477	Apigenin	HMDB0002124	5280443	C01477	C1=CC(=CC=C1C2=CC(=O)C3=C(C=C(C=C3O2)O)O)O	1
C10044	Norizalpinin	HMDB0029521	5281616	C10044	C1=CC=C(C=C1)C2=C(C(=O)C3=C(C=C(C=C3O2)O)O)O	1
C00015	Uridine 5'-diphosphate	HMDB0000295	6031	C00015	C1=CN(C(=O)NC1=O)[C@H]2[C@@H]([C@@H]([C@H](O2)COP(=O)(O)OP(=O)(O)O)O)O	1
C05640	Cinnavalininate	HMDB0004078	114918	C05640	C1=CC(=C2C(=C1)OC3=CC(=O)C(=C(C3=N2)C(=O)O)N)C(=O)O	1
C03150	Nicotinamide riboside	HMDB0000855	439924	C03150	C1=CC(=C[N+](=C1)[C@H]2[C@@H]([C@@H]([C@H](O2)CO)O)O)C(=O)N	1
C03758	Dopamine	HMDB0000073	681	C03758	C1=CC(=C(C=C1CCN)O)O	1
C03428	Presqualene diphosphate	HMDB0001278	5280592	C03428	CC(=CCC/C(=C/CC/C(=C/[C@H]1[C@@H]([C@@]1(C)CC/C=C(\C)/CCC=C(C)C)COP(=O)(O)OP(=O)(O)O)/C)/C)C	1
C20345	Isopentenyl phosphate	NA	163312083	C20345	NA	1
C00357	N-Acetyl-D-Glucosamine 6-Phosphate	HMDB0001062	440996	C00357	CC(=O)N[C@@H]1[C@H]([C@@H]([C@H](OC1O)COP(=O)(O)O)O)O	1
C04501	N-Acetyl-glucosamine 1-phosphate	HMDB0001367	7115	C04501	CC(=O)N[C@@H]1[C@@H](O)[C@H](O)[C@@H](CO)OC1OP(O)(O)=O	1
C11860	Gibberellin A15 open lactone	METPA1648	NA	C11860	NA	1
C06094	Gibberellin A53	HMDB0036895	5253706	C06094	CC12CCCC(C)(C1C(C(O)=O)C13CC(=C)C(O)(C1)CCC23)C(O)=O	1
C16541	Chlorophyllide b	MA3TEM075	51090870	C16541	CCOCCCC(=O)NC1=CC=CC=C1C2=NNC(=N2)C(C)C	1
C02576	Perillyl aldehyde	HMDB0003647	16441	C02576	CC(=C)C1CCC(=CC1)C=O	1
C00386	Carnosine	HMDB0000033	439224	C00386	C1=C(NC=N1)C[C@@H](C(=O)O)NC(=O)CCN	1
C00307	Citicoline	HMDB0001413	13804	C00307	C[N+](C)(C)CCOP(=O)([O-])OP(=O)(O)OC[C@@H]1[C@H]([C@H]([C@@H](O1)N2C=CC(=NC2=O)N)O)O	1
C00020	Adenosine monophosphate	HMDB0000045	6083	C00020	C1=NC2=C(C(=N1)N)N=CN2[C@H]3[C@@H]([C@@H]([C@H](O3)COP(=O)(O)O)O)O	1
C00362	2'-Deoxyguanosine 5'-monophosphate	HMDB0001044	65059	C00362	C1[C@@H]([C@H](O[C@H]1N2C=NC3=C2NC(=NC3=O)N)COP(=O)(O)O)O	1
C00322	Oxoadipic acid	HMDB0000225	71	C00322	C(CC(=O)C(=O)O)CC(=O)O	1
C06081	Farnesol	HMDB0004305	445070	C06081	CC(=CCC/C(=C/CC/C(=C/CO)/C)/C)C	1
C01126	(2E,6E)-Farnesol	NA	4357	C01126	NA	1
C00314	Pyridoxine	HMDB0000239	1054	C00314	CC1=NC=C(C(=C1O)CO)CO	1
C16310	(Z)-3-Hexenal	HMDB0031498	643941	C16310	CC/C=C\CC=O	1
C17743	Bisdemethoxycurcumin	HMDB0002114	5315472	C17743	C1=CC(=CC=C1/C=C/C(=O)CC(=O)/C=C/C2=CC=C(C=C2)O)O	1
C00828	Vitamin K2	HMDB0030017	5283547	C00828	CC1=C(C(=O)C2=CC=CC=C2C1=O)C/C=C(\C)/CC/C=C(\C)/CC/C=C(\C)/CC/C=C(\C)/CC/C=C(\C)/CCC=C(C)C	1
C00206	dADP	HMDB0001508	53477733	C00206	C1[C@@H]([C@H](OC1N2C=NC3=C2N=CN=C3N)COP(=O)(O)OP(=O)(O)O)O	1
C11821	5-Hydroxyisourate	HMDB0030097	250388	C11821	C12=NC(=O)NC1(C(=O)NC(=O)N2)O	1
C12248	5-hydroxy-2-oxo-4-ureido-2,5-dihydro-1H-imidazole-5-carboxylate	HMDB0059663	443736	C12248	NC(=O)NC1=NC(=O)NC1(O)C(O)=O	1
C02938	3-Indoleacetonitrile	HMDB0006524	351795	C02938	C1=CC=C2C(=C1)C(=CN2)CC#N	1
C00063	Cytidine triphosphate	HMDB0000082	6176	C00063	C1=CN(C(=O)N=C1N)[C@H]2[C@@H]([C@@H]([C@H](O2)COP(=O)(O)OP(=O)(O)OP(=O)(O)O)O)O	1
C04352	4-Phosphopantothenoylcysteine	HMDB0001117	440304	C04352	CC(C)(COP(=O)(O)O)[C@H](C(=O)NCCC(=O)N[C@@H](CS)C(=O)O)O	1
C16405	Homoeriodictyol chalcone	METPA1731	NA	C16405	NA	1
C07480	Theobromine	HMDB0002825	5429	C07480	CN1C=NC2=C1C(=O)NC(=O)N2C	1
C13747	Paraxanthine	HMDB0001860	4687	C13747	CN1C=NC2=C1C(=O)N(C(=O)N2)C	1
C02985	Fucose 1-phosphate	HMDB0001265	439871	C02985	C[C@H]1[C@H]([C@H]([C@@H](C(O1)OP(=O)(O)O)O)O)O	1
C01182	D-Ribulose 1,5-bisphosphate	METPA0139	NA	C01182	NA	1
C00130	Inosinic acid	HMDB0000175	8582	C00130	C1=NC(=O)C2=C(N1)N(C=N2)[C@H]3[C@@H]([C@@H]([C@H](O3)COP(=O)(O)O)O)O	1
C03461	2-trans,6-trans-Farnesal	HMDB0060356	5280598	C03461	CC(C)=CCC\C(C)=C\CC\C(C)=C\C=O	1
C00016	FAD	HMDB0001248	643975	C00016	CC1=CC2=C(C=C1C)N(C3=NC(=O)NC(=O)C3=N2)C[C@@H]([C@@H]([C@@H](COP(=O)(O)OP(=O)(O)OC[C@@H]4[C@H]([C@H]([C@@H](O4)N5C=NC6=C5N=CN=C6N)O)O)O)O)O	1
C00500	Biliverdin	HMDB0001008	5353439	C00500	CC\1=C(/C(=C/C2=C(C(=C(N2)/C=C\3/C(=C(C(=O)N3)C)C=C)C)CCC(=O)O)/N/C1=C/C4=NC(=O)C(=C4C)C=C)CCC(=O)O	1
C00127	Oxidized glutathione	HMDB0003337	975	C00127	C(CC(=O)NC(CSSCC(C(=O)NCC(=O)O)NC(=O)CCC(C(=O)O)N)C(=O)NCC(=O)O)C(C(=O)O)N	1
C00251	Chorismate	HMDB0012199	12039	C00251	C=C(C(=O)O)O[C@@H]1C=C(C=C[C@H]1O)C(=O)O	1
C00254	Prephenate	HMDB0012283	1028	C00254	C1=CC(C=CC1O)(CC(=O)C(=O)O)C(=O)O	1
C01035	4-Guanidinobutanoic acid	HMDB0003464	500	C01035	C(CC(=O)O)CN=C(N)N	1
C15976	2-Methyl-1-hydroxypropyl-ThPP	HMDB0006866	23724626	C15976	CC1=C(SC(=[N+]1CC2=CN=C(N=C2N)C)C(C(C)C)O)CCOP(=O)(O)OP(=O)(O)O	1
C02906	Dihydromyricetin	NA	5833	C02906	NA	1
C05528	3-Sulfopyruvic acid	HMDB0004045	440717	C05528	C(C(=O)C(=O)O)S(=O)(=O)O	1
C16335	OPC4-CoA	HMDB0011113	53480659	C16335	CC/C=C\C[C@H]1C(CCC1=O)CCCC(=O)SCCNC(=O)CCNC(=O)[C@@H](C(C)(C)COP(=O)(O)OP(=O)(O)OC[C@@H]2[C@@H](C([C@@H](O2)N3C=NC4=C3N=CN=C4N)O)OP(=O)(O)O)O	1
C16911	Afzelin	NA	96023404	C16911	NA	1
C00077	Ornithine	HMDB0000214	6262	C00077	C(C[C@@H](C(=O)O)N)CN	1
C02034	Gibberellin A19	HMDB0036896	4632015	C02034	CC1(CCCC2(C=O)C3CCC4(O)CC3(CC4=C)C(C12)C(O)=O)C(O)=O	1
C11861	Gibberellin A124	HMDB0037103	0	C11861	[H][C@@]12C[C@H](O)[C@]3(O)C[C@]1(CC3=C)[C@@H](C(O)=O)[C@@]1([H])[C@@]22CCC[C@]1(C)C(=O)OC2	1
C18167	Secoisolariciresinol	HMDB0013692	65373	C18167	COC1=C(C=CC(=C1)C[C@@H](CO)[C@@H](CC2=CC(=C(C=C2)O)OC)CO)O	1
C20456	(+)-Secoisolariciresinol	NA	163312193	C20456	NA	1
C17210	2-(2'-Methylthio)ethylmalic acid	METPA1766	NA	C17210	NA	1
C17212	3-(2'-Methylthio)ethylmalic acid	NA	96023620	C17212	NA	1
C05908	Delphinidin	HMDB0003074	68245	C05908	C1=C(C=C(C(=C1O)O)O)C2=C(C=C3C(=CC(=CC3=[O+]2)O)O)O.[Cl-]	1
C01962	Thiocysteine	HMDB0003585	439614	C01962	C([C@H](C(=O)O)N)SS	1
C04640	Phosphoribosylformylglycineamidine	HMDB0000999	440417	C04640	C([C@@H]1[C@H]([C@H]([C@@H](O1)N=C(CNC=O)N)O)O)OP(=O)(O)O	1
C11863	Gibberellin A9	METPA1064	NA	C11863	NA	1
C05674	CMP-N-trimethyl-2-aminoethylphosphonate	HMDB0060072	440755	C05674	C[N+](C)(C)CCP(O)(=O)OP(O)(=O)OC[C@H]1O[C@H]([C@H](O)[C@@H]1O)N1C=CC(=N)N=C1O	1
C06010	(S)-2-Acetolactate	HMDB0006855	440878	C06010	CC(=O)[C@@](C)(C(=O)O)O	1
C05335	Selenomethionine	HMDB0003966	15103	C05335	C[Se]CCC(C(=O)O)N	1
C20700	(3E,7E)-4,8,12-Trimethyl-1,3,7,11-tridecatetraene	HMDB0034498	13941492	C20700	CC(C)=CCC\C(C)=C/CC\C(C)=C\C=C	1
C18021	Pheophorbide a	METPA1634	NA	C18021	NA	1
C05770	Coproporphyrin III	HMDB0000570	NA	C05770	CC1=C(CCC(O)=O)/C2=C/C3=N/C(=C\C4=C(C)C(CCC(O)=O)=C(N4)/C=C4\N=C(\C=C\1/N\2)C(C)=C4CCC(O)=O)/C(CCC(O)=O)=C3C	1
C18098	Primary fluorescent chlorophyll catabolite	METPA1637	NA	C18098	NA	1
C00780	Serotonin	HMDB0000259	5202	C00780	C1=CC2=C(C=C1O)C(=CN2)CCN	1
C00106	Uracil	HMDB0000300	1174	C00106	C1=CNC(=O)NC1=O	1
C05921	Biotinyl-5'-AMP	HMDB0004220	440839	C05921	C1C2C([C@@H](S1)CCCCC(=O)OP(=O)(O)OC[C@@H]3[C@H]([C@H]([C@@H](O3)N4C=NC5=C4N=CN=C5N)O)O)NC(=O)N2	1
C03089	5-Methylthioribose	HMDB0001087	439904	C03089	CSC[C@@H]1[C@H]([C@H]([C@@H](O1)O)O)O	1
C06007	(R) 2,3-Dihydroxy-3-methylvalerate	HMDB0012140	448154	C06007	CC[C@](C)([C@H](C(=O)O)O)O	1
C00522	(R)-Pantoate	METPA0053	NA	C00522	NA	1
C00418	Mevalonic acid	HMDB0000227	449	C00418	CC(CCO)(CC(=O)O)O	1
C00233	Ketoleucine	HMDB0000695	70	C00233	CC(C)CC(=O)C(=O)O	1
C16426	Isopentenyladenosine-5'-diphosphate	METPA1687	NA	C16426	NA	1
C05688	Selenocysteine	HMDB0003288	25076	C05688	C([C@@H](C(=O)O)N)[SeH]	1
C01041	Ascorbic acid	HMDB0000044	54670067	C01041	C([C@@H]([C@@H]1C(=C(C(=O)O1)O)O)O)O	1
C02670	D-Glucurono-6,3-lactone	HMDB0006355	439782	C02670	[C@H]1([C@@H]2[C@@H]([C@H](C(=O)O2)O)O[C@H]1O)O	1
C03289	L-xylo-Hexulonolactone	METPA0381	NA	C03289	NA	1
C05913	(3Z)-Phytochromobilin	METPA0710	NA	C05913	NA	1
C00120	Biotin	HMDB0000030	171548	C00120	C1[C@H]2[C@@H]([C@@H](S1)CCCCC(=O)O)NC(=O)N2	1
C00811	4-Hydroxycinnamic acid	HMDB0002035	637542	C00811	C1=CC(=CC=C1/C=C/C(=O)O)O	1
C00166	Phenylpyruvic acid	HMDB0000205	997	C00166	C1=CC=C(C=C1)CC(=O)C(=O)O	1
C02763	Enol-phenylpyruvate	HMDB0012225	641637	C02763	C1=CC=C(C=C1)/C=C(/C(=O)O)\O	1
C10945	Caffeic aldehyde	METPA1697	NA	C10945	NA	1
C05838	Coumaric acid	HMDB0041592	5280841	C05838	OC(=O)\C=C/C1=CC=CC=C1O	1
C04556	4-Amino-2-methyl-5-phosphomethylpyrimidine	METPA0511	NA	C04556	NA	1
C06090	ent-Kaurene	METPA0757	NA	C06090	NA	1
C20145	ent-Isokaurene	NA	135626605	C20145	NA	1
C18225	9beta-Pimara-7,15-diene	NA	103061407	C18225	NA	1
C18226	ent-Cassa-12,15-diene	NA	103061408	C18226	NA	1
C18224	Stemod-13(17)-ene	NA	103061406	C18224	NA	1
C11877	(+)-Sandaracopimaradiene	NA	14039	C11877	NA	1
C18228	ent-Pimara-8(14),15-diene	NA	103061410	C18228	NA	1
C18223	Stemar-13-ene	NA	103061405	C18223	NA	1
C20185	(12E)-9alpha-Labda-8(17),12,14-triene	NA	163311928	C20185	NA	1
C20681	(E,E)-Geranyllinalool	NA	172232401	C20681	NA	1
C05421	All-trans-Phytoene	HMDB0039093	7785	C05421	CC(=CCCC(=CCOC=O)C)C	1
C00064	L-Glutamine	HMDB0000641	5961	C00064	C(CC(=O)N)[C@@H](C(=O)O)N	1
C21029	(R)-3-Ureidoisobutyrate	NA	254816254	C21029	NA	1
C01302	1-(2-Carboxyphenylamino)-1-deoxy-D-ribulose 5-phosphate	METPA0170	NA	C01302	NA	1
C04302	N-(5-Phospho-D-ribosyl)anthranilate	METPA0483	NA	C04302	NA	1
C00239	dCMP	HMDB0001202	13945	C00239	C1[C@@H]([C@H](O[C@H]1N2C=CC(=NC2=O)N)COP(=O)(O)O)O	1
C01267	Imidazole acetol-phosphate	HMDB0012236	792	C01267	C1=C(NC=N1)CC(=O)COP(=O)(O)O	1
C00407	L-Isoleucine	HMDB0000172	6306	C00407	CC[C@H](C)[C@@H](C(=O)O)N	1
C00123	L-Leucine	HMDB0000687	6106	C00123	CC(C)C[C@@H](C(=O)O)N	1
C05911	Pentahydroxyflavanone	METPA1717	NA	C05911	NA	1
C01617	Taxifolin	METPA0191	NA	C01617	NA	1
C06196	dIMP	HMDB0006555	91531	C06196	C1[C@@H]([C@H](O[C@H]1N2C=NC3=C2NC=NC3=O)COP(=O)(O)O)O	1
C05903	Kaempferol	HMDB0005801	5280863	C05903	C1=CC(=CC=C1C2=C(C(=O)C3=C(C=C(C=C3O2)O)O)O)O	1
C01514	Luteolin	HMDB0005800	5280445	C01514	C1=CC(=C(C=C1C2=CC(=O)C3=C(C=C(C=C3O2)O)O)O)O	1
C09751	(2R,3R)-3,4',7-Trihydroxyflavanone	HMDB0037254	3512634	C09751	OC1C(OC2=CC(O)=CC=C2C1=O)C1=CC=C(O)C=C1	1
C00509	Naringenin	HMDB0002670	439246	C00509	C1[C@H](OC2=CC(=CC(=C2C1=O)O)O)C3=CC=C(C=C3)O	1
C09614	Butin	METPA1718	NA	C09614	NA	1
C06561	Chalconaringenin	HMDB0029631	5280960	C06561	C1=CC(=CC=C1/C=C/C(=O)C2=C(C=C(C=C2O)O)O)O	1
C08578	Butein	METPA1722	NA	C08578	NA	1
C06425	Arachidic acid	HMDB0002212	10467	C06425	CCCCCCCCCCCCCCCCCCCC(=O)O	1
C04536	Magnesium protoporphyrin monomethyl ester	METPA0508	NA	C04536	NA	1
C00885	Isochorismate	METPA0094	NA	C00885	NA	1
C00033	Acetic acid	HMDB0000042	176	C00033	CC(=O)O	1
C00258	Glyceric acid	HMDB0000139	439194	C00258	C([C@H](C(=O)O)O)O	1
C00266	Glycolaldehyde	HMDB0003344	756	C00266	C(C=O)O	1
C00073	L-Methionine	HMDB0000696	6137	C00073	CSCC[C@@H](C(=O)O)N	1
C00440	5-Methyltetrahydrofolic acid	HMDB0001396	439234	C00440	CN1C(CNC2=C1C(=O)N=C(N2)N)CNC3=CC=C(C=C3)C(=O)N[C@H](CCC(=O)O)C(=O)O	1
C03492	D-4'-Phosphopantothenate	HMDB0001016	131	C03492	CC(C)(COP(=O)(O)O)C(C(=O)NCCC(=O)O)O	1
C22116	3beta-Hydroxy-4beta,14alpha-dimethyl-9beta,19-cyclo-5alpha-ergost-24(24(1))-en-4alpha-carboxylate	NA	NA	C22116	NA	1
C15532	N-a-Acetylcitrulline	HMDB0000856	11506771	C15532	CC(=O)NC(CCCNC(=O)N)C(=O)O	1
C06427	Alpha-Linolenic acid	HMDB0001388	5280934	C06427	CC/C=C\C/C=C\C/C=C\CCCCCCCC(=O)O	1
C06426	Gamma-Linolenic acid	HMDB0003073	5280933	C06426	CCCCC/C=C\C/C=C\C/C=C\CCCCC(=O)O	1
C01149	4-Trimethylammoniobutanal	HMDB0001345	133	C01149	C[N+](C)(C)CCCC=O	1
C00179	Agmatine	HMDB0001432	199	C00179	C(CCN=C(N)N)CN	1
C00882	Dephospho-CoA	HMDB0001373	439335	C00882	CC(C)(COP(=O)(O)OP(=O)(O)OC[C@@H]1[C@H]([C@H]([C@@H](O1)N2C=NC3=C2N=CN=C3N)O)O)C(C(=O)NCCC(=O)NCCS)O	1
C01103	Orotidylic acid	HMDB0000218	160617	C01103	C1=C(N(C(=O)NC1=O)[C@H]2[C@@H]([C@@H]([C@H](O2)COP(=O)(O)O)O)O)C(=O)O	1
C05332	Phenylethylamine	HMDB0012275	1001	C05332	C1=CC=C(C=C1)CCN	1
C17621	10-Hydroxygeraniol	METPA1453	NA	C17621	NA	1
C01185	Nicotinic acid mononucleotide	HMDB0001132	53477721	C01185	C1C(C=CC=[N+]1[C@H]2[C@@H]([C@@H]([C@H](O2)COP(=O)(O)[O-])O)O)C(=O)O	1
C00729	Tropine	METPA0074	NA	C00729	NA	1
C02934	3-Dehydrosphinganine	HMDB0001480	439853	C02934	CCCCCCCCCCCCCCCC(=O)[C@H](CO)N	1
C00319	Sphingosine	HMDB0000252	5353955	C00319	CCCCCCCCCCCCC/C=C/C(C(CO)N)O	1
C00441	L-Aspartate-semialdehyde	HMDB0012249	439235	C00441	C(C=O)[C@@H](C(=O)O)N	1
C15606	1,2-Dihydroxy-3-keto-5-methylthiopentene	HMDB0012134	5462190	C15606	CSCCC(=O)/C(=C/O)/O	1
C02637	3-Dehydroshikimate	METPA0312	NA	C02637	NA	1
C00463	Indole	HMDB0000738	798	C00463	C1=CC=C2C(=C1)C=CN2	1
C01051	Uroporphyrinogen III	HMDB0001086	1179	C01051	C1C2=C(C(=C(N2)CC3=C(C(=C(N3)CC4=C(C(=C(N4)CC5=C(C(=C1N5)CCC(=O)O)CC(=O)O)CC(=O)O)CCC(=O)O)CC(=O)O)CCC(=O)O)CC(=O)O)CCC(=O)O	1
C05766	Uroporphyrinogen I	HMDB0002211	440775	C05766	C1C2=C(C(=C(N2)CC3=C(C(=C(N3)CC4=C(C(=C(N4)CC5=C(C(=C1N5)CC(=O)O)CCC(=O)O)CC(=O)O)CCC(=O)O)CC(=O)O)CCC(=O)O)CC(=O)O)CCC(=O)O	1
C00352	Glucosamine 6-phosphate	HMDB0001254	439217	C00352	C([C@@H]1[C@H]([C@@H]([C@H]([C@H](O1)O)N)O)O)OP(=O)(O)O	1
C11945	trans-2-Methyl-5-isopropylhexa-2,5-dienoyl-CoA	HMDB0006530	53477851	C11945	CC(C)C(=C)C/C=C(/C)\C(=O)SCCNC(=O)CCNC(=O)[C@@H](C(C)(C)COP(=O)(O)OP(=O)(O)OC[C@@H]1[C@@H](C([C@@H](O1)N2C=NC3=C2N=CN=C3N)O)OP(=O)(O)O)O	1
C11946	cis-2-Methyl-5-isopropylhexa-2,5-dienoyl-CoA	HMDB0006540	53477855	C11946	CC(C)C(=C)C/C=C(\C)/C(=O)SCCNC(=O)CCNC(=O)[C@@H](C(C)(C)COP(=O)(O)OP(=O)(O)OC[C@@H]1C([C@@H]([C@@H](O1)N2C=NC3=C2N=CN=C3N)O)OP(=O)(O)O)O	1
C00974	Aromadendrin	HMDB0030847	662	C00974	C1=CC(=CC=C1C2C(C(=O)C3=C(C=C(C=C3O2)O)O)O)O	1
C05631	Eriodictyol	HMDB0005810	440735	C05631	C1[C@H](OC2=CC(=CC(=C2C1=O)O)O)C3=CC(=C(C=C3)O)O	1
C01378	Fustin	METPA1727	NA	C01378	NA	1
C15525	Eriodictyol chalcone	METPA1729	NA	C15525	NA	1
C00387	Guanosine	HMDB0000133	6802	C00387	C1=NC2=C(N1[C@H]3[C@@H]([C@@H]([C@H](O3)CO)O)O)NC(=NC2=O)N	1
C02325	Sinapyl alcohol	HMDB0013070	5280507	C02325	COC1=CC(=CC(=C1O)OC)/C=C/CO	1
C00346	O-Phosphoethanolamine	HMDB0000224	1015	C00346	C(COP(=O)(O)O)N	1
C01024	Hydroxymethylbilane	HMDB0001137	788	C01024	C1=C(C(=C(N1)CC2=C(C(=C(N2)CC3=C(C(=C(N3)CC4=C(C(=C(N4)CO)CC(=O)O)CCC(=O)O)CC(=O)O)CCC(=O)O)CC(=O)O)CCC(=O)O)CC(=O)O)CCC(=O)O	1
C15802	6-Deoxocastasterone	HMDB0033984	13870433	C15802	C[C@@H]([C@H]1CC[C@@H]2[C@@]1(CC[C@H]3[C@H]2CC[C@@H]4[C@@]3(C[C@H]([C@H](C4)O)O)C)C)[C@H]([C@@H]([C@@H](C)C(C)C)O)O	1
C01061	4-Fumarylacetoacetic acid	HMDB0001268	5280398	C01061	C(C(=O)CC(=O)O)C(=O)/C=C/C(=O)O	1
C08362	Palmitoleic acid	HMDB0003229	5312427	C08362	CCCCCC/C=C\CCCCCCCC(=O)O	1
C05698	Selenohomocysteine	HMDB0004119	440763	C05698	C(C[SeH])C(C(=O)O)N	1
C03078	4-Guanidinobutanamide	METPA0359	NA	C03078	NA	1
C05638	5-Hydroxykynurenamine	HMDB0004076	164719	C05638	C1=CC(=C(C=C1O)C(=O)CCN)N	1
C06114	gamma-Glutamyl-beta-aminopropiononitrile	HMDB0060477	440920	C06114	[H][C@](N)(CCC(O)=NCCC#N)C(O)=O	1
C00712	Oleic acid	HMDB0000207	445639	C00712	CCCCCCCC/C=C\CCCCCCCC(=O)O	1
C05946	D-4-Hydroxy-2-oxoglutarate	HMDB0060466	440853	C05946	[H][C@@](O)(CC(=O)C(O)=O)C(O)=O	1
C12205	5-Hydroxyconiferyl alcohol	HMDB0060398	5282095	C12205	COC1=CC(\C=C\CO)=CC(O)=C1O	1
C15672	Heme O	HMDB0001162	0	C15672	CC(C)=CCC\C(C)=C\CC\C(C)=C\CCC(O)C1=C(C)/C2=C/C3=N/C(=C\C4=C(CCC(O)=O)C(C)=C5/C=C6\N=C(\C=C\1/N\2[Fe]N45)C(C)=C6C=C)/C(CCC(O)=O)=C3C	1
C18022	Red chlorophyll catabolite	METPA1635	NA	C18022	NA	1
C05125	2-(a-Hydroxyethyl)thiamine diphosphate	HMDB0003904	440568	C05125	CC1=C(SC(=[N+]1CC2=CN=C(N=C2N)C)C(C)O)CCOP(=O)(O)OP(=O)(O)O	1
C00588	Phosphorylcholine	HMDB0001565	8691	C00588	C[N+](C)(C)CCOP(=O)(O)O	1
C01205	(R)-b-aminoisobutyric acid	HMDB0002299	5459822	C01205	C[C@H](CN)C(=O)O	1
C00334	Gamma-Aminobutyric acid	HMDB0000112	223130	C00334	C(CC(=O)O)CN	1
C02356	L-Alpha-aminobutyric acid	HMDB0000452	80283	C02356	CC[C@@H](C(=O)O)N	1
C08492	(E)-3-Hexen-1-ol	HMDB0030003	5281167	C08492	CC/C=C\CCO	1
C03242	8,11,14-Eicosatrienoic acid	HMDB0002925	5280581	C03242	CCCCC/C=C\C/C=C\C/C=C\CCCCCCC(=O)O	1
C05905	Cyanidin	HMDB0002708	68247	C05905	C1=CC(=C(C=C1C2=C(C=C3C(=CC(=CC3=[O+]2)O)O)O)O)O.[Cl-]	1
C12206	Caffeyl alcohol	METPA1708	NA	C12206	NA	1
C00043	Uridine diphosphate-N-acetylglucosamine	HMDB0000290	9547196	C00043	CC(=O)N[C@@H]1[C@H]([C@@H]([C@H](O[C@@H]1OP(=O)(O)OP(=O)(O)OC[C@@H]2[C@H]([C@H]([C@@H](O2)N3C=CC(=O)NC3=O)O)O)CO)O)O	1
G10610	UDP-N-acetyl-D-glucosamine	METPA1612	NA	G10610	NA	1
C00989	Gamma Hydroxybutyric Acid	HMDB0015507	3037032	C00989	C(CC(=O)[O-])CO	1
C00042	Succinic acid	HMDB0000254	1110	C00042	C(CC(=O)O)C(=O)O	1
C02170	Methylmalonic acid	HMDB0000202	487	C02170	CC(C(=O)O)C(=O)O	1
C06056	4-Hydroxy-L-threonine	METPA0747	NA	C06056	NA	1
C00944	3-Dehydroquinate	HMDB0012710	439351	C00944	C1[C@H]([C@@H](C(=O)C[C@]1(C(=O)O)O)O)O	1
C00047	L-Lysine	HMDB0000182	5962	C00047	C(CCN)C[C@@H](C(=O)O)N	1
C03373	5-Aminoimidazole ribonucleotide	HMDB0001235	161500	C03373	C1=C(N(C=N1)[C@H]2[C@@H]([C@@H]([C@H](O2)COP(=O)(O)O)O)O)N	1
C06459	Phosphorylcholine	HMDB0001565	8691	C06459	C[N+](C)(C)CCOP(O)(O)=O	1
C04327	4-Methyl-5-(2-phosphoethyl)-thiazole	METPA0487	NA	C04327	NA	1
C00049	L-Aspartic acid	HMDB0000191	5960	C00049	C([C@@H](C(=O)O)N)C(=O)O	1
C05130	Imidazole-4-acetaldehyde	HMDB0003905	150841	C05130	C1=C(NC=N1)CC=O	1
C00458	dCTP	HMDB0000998	65091	C00458	C1[C@@H]([C@H](O[C@H]1N2C=CC(=NC2=O)N)COP(=O)(O)OP(=O)(O)OP(=O)(O)O)O	1
C00590	Coniferyl alcohol	HMDB0012915	1549095	C00590	COC1=C(C=CC(=C1)/C=C/CO)O	1
C15670	Chenodeoxyglycocholoyl-CoA	HMDB0006897	440685	C15670	CC(CCC(=O)SCCNC(=O)CCNC(=O)C(C(C)(C)COP(=O)(O)OP(=O)(O)OC[C@@H]1[C@H]([C@H]([C@@H](O1)N2C=NC3=C2N=CN=C3N)O)OP(=O)(O)O)O)C4CCC5[C@@]4(CCC6C5[C@@H](C[C@H]7[C@@]6(CC[C@H](C7)O)C)O)C	1
C00577	D-Glyceraldehyde	NA	3856	C00577	NA	1
C01013	Hydroxypropionic acid	HMDB0000700	68152	C01013	C(CO)C(=O)O	1
C00184	Dihydroxyacetone	HMDB0001882	670	C00184	C(C(=O)CO)O	1
C00256	D-Lactic acid	HMDB0001311	61503	C00256	C[C@H](C(=O)O)O	1
C00327	Citrulline	HMDB0000904	9750	C00327	C(C[C@@H](C(=O)O)N)CNC(=O)N	1
C00131	Deoxyadenosine triphosphate	HMDB0001532	15993	C00131	C1[C@@H]([C@H](O[C@H]1N2C=NC3=C2N=CN=C3N)COP(=O)(O)OP(=O)(O)OP(=O)(O)O)O	1
C17222	2-(5'-Methylthio)pentylmalic acid	METPA1769	NA	C17222	NA	1
C17223	3-(5'-Methylthio)pentylmalic acid	NA	96023631	C17223	NA	1
C03231	3-Methylglutaconyl-CoA	HMDB0001057	5462214	C03231	C/C(=C\C(=O)SCCNC(=O)CCNC(=O)C(C(C)(C)COP(=O)(O)OP(=O)(O)OCC1C(C(C(O1)N2C=NC3=C2N=CN=C3N)O)OP(=O)(O)O)O)/CC(=O)O	1
C14144	5-Carboxy-2-pentenoyl-CoA	HMDB0060392	24798711	C14144	O[C@H](C(C)(C)COP(=O)(O)OP(O)(=O)OC[C@H]1O[C@H]([C@H](O)[C@@H]1OP(O)(O)=O)N1C=NC2=C1N=CN=C2N)C(=O)NCCC(=O)NCCSC(=O)\C=C\CCC(O)=O	1
C00299	Uridine	HMDB0000296	6029	C00299	C1=CN(C(=O)NC1=O)[C@H]2[C@@H]([C@@H]([C@H](O2)CO)O)O	1
C00449	Saccharopine	HMDB0000279	160556	C00449	C(CCN[C@@H](CCC(=O)O)C(=O)O)C[C@@H](C(=O)O)N	1
C04294	5-(2-Hydroxyethyl)-4-methylthiazole	HMDB0032985	1136	C04294	CC1=C(SC=N1)CCO	1
C00331	Indolepyruvate	HMDB0060484	803	C00331	OC(=O)C(=O)CC1=CNC2=CC=CC=C12	1
C00794	Sorbitol	HMDB0000247	5780	C00794	C([C@H]([C@H]([C@@H]([C@H](CO)O)O)O)O)O	1
C11832	Divinyl chlorophyllide a	METPA1062	NA	C11832	NA	1
C11830	13(1)-Oxo-magnesium-protoporphyrin IX 13-monomethyl ester	METPA1060	NA	C11830	NA	1
C02880	Protochlorophyllide	HMDB0031148	NA	C02880	[Mg++].[H]\C-1=C2\[N-]\C(=C([H])/C3=N/C(/C(CCC([O-])=O)=C3C)=C3\C(C(=O)OC)C(=O)C4=C(C)\C(\N=C34)=C([H])\C3=C(C=C)C(C)=C-1N3)C(C)=C2C=C	1
C00844	Prunasin	HMDB0034934	119033	C00844	C1=CC=C(C=C1)[C@H](C#N)O[C@H]2[C@@H]([C@H]([C@@H]([C@H](O2)CO)O)O)O	1
G00019	(GlcNAc)5 (Man)3 (Asn)1	METPA1486	NA	G00019	NA	1
C03263	Coproporphyrinogen III	HMDB0001261	321	C03263	CC1=C2CC3=C(C(=C(N3)CC4=C(C(=C(N4)CC5=C(C(=C(N5)CC(=C1CCC(=O)O)N2)C)CCC(=O)O)C)CCC(=O)O)CCC(=O)O)C	1
C05768	Coproporphyrinogen I	HMDB0002158	68271	C05768	CC1=C2CC3=C(C(=C(N3)CC4=C(C(=C(N4)CC5=C(C(=C(N5)CC(=C1CCC(=O)O)N2)C)CCC(=O)O)C)CCC(=O)O)C)CCC(=O)O	1
C01137	S-Adenosylmethioninamine	HMDB0000988	439415	C01137	C[S+](CCCN)C[C@@H]1[C@H]([C@H]([C@@H](O1)N2C=NC3=C2N=CN=C3N)O)O	1
C13455	Abscisic aldehyde	METPA1110	NA	C13455	NA	1
C20693	Carlactone	NA	172232413	C20693	NA	1
C05262	(S)-3-Hydroxydodecanoyl-CoA	HMDB0003936	440603	C05262	CCCCCCCCC[C@@H](CC(=O)SCCNC(=O)CCNC(=O)C(C(C)(C)COP(=O)(O)OP(=O)(O)OC[C@@H]1[C@H]([C@H]([C@@H](O1)N2C=NC3=C2N=CN=C3N)O)OP(=O)(O)O)O)O	1
C17230	2-(7'-Methylthio)heptylmalic acid	METPA1771	NA	C17230	NA	1
C17231	3-(7'-Methylthio)heptylmalic acid	NA	96023639	C17231	NA	1
C15967	Phoenicoxanthin	METPA1673	NA	C15967	NA	1
C02642	Ureidopropionic acid	HMDB0000026	111	C02642	C(CNC(=O)N)C(=O)O	1
C00152	L-Asparagine	HMDB0000168	6267	C00152	C([C@@H](C(=O)O)N)C(=O)N	1
G10618	Dolichyl D-glucosyl phosphate	METPA1616	NA	G10618	NA	1
G10617	NA	NA	NA	NA	NA	0
C00447	Sedoheptulose 1,7-bisphosphate	HMDB0060274	164735	C00447	O[C@H](COP(O)(O)=O)[C@@H](O)[C@@H](O)[C@H](O)C(=O)COP(O)(O)=O	1
C06054	2-Oxo-3-hydroxy-4-phosphobutanoic acid	HMDB0006801	21145142	C06054	C([C@H](C(=O)C(=O)O)O)OP(=O)(O)O	1
C00214	Thymidine	HMDB0000273	5789	C00214	CC1=CN(C(=O)NC1=O)[C@H]2C[C@@H]([C@H](O2)CO)O	1
G10595	(GlcNAc)2 (Man)6 (PP-Dol)1	METPA1607	NA	G10595	NA	1
C02362	2-Oxosuccinamic acid	HMDB0060350	439716	C02362	OC(=N)CC(=O)C(O)=O	1
C05840	Iminoaspartic acid	HMDB0001131	796	C05840	C(C(=N)C(=O)O)C(=O)O	1
C00178	Thymine	HMDB0000262	1135	C00178	CC1=CNC(=O)NC1=O	1
C02835	Imidazoleacetic acid	HMDB0002024	96215	C02835	C1=C(NC=N1)CC(=O)O	1
G00146	(GlcN)1 (Ino(acyl)-P)1 (Man)1	METPA1584	NA	G00146	NA	1
C02091	Ureidoglycine	METPA0247	NA	C02091	NA	1
C01118	O-Succinyl-L-homoserine	METPA0134	NA	C01118	NA	1
C01165	L-Glutamic gamma-semialdehyde	HMDB0002104	193305	C01165	C(C[C@@H](C(=O)O)N)C=O	1
C01157	4-Hydroxyproline	HMDB0000725	5810	C01157	C1[C@H](CN[C@@H]1C(=O)O)O	1
C02659	Acetone cyanhydri	MA3TEM059	5632	C02659	CCCCOC(=O)C1=CC=CC=C1NC2=CC=CC(=C2)C(F)(F)F	1
C00430	5-Aminolevulinic acid	HMDB0001149	137	C00430	C(CC(=O)O)C(=O)CN	1
C03741	(S)-4-Amino-5-oxopentanoate	METPA0432	NA	C03741	NA	1
C05381	3-Carboxy-1-hydroxypropylthiamine diphosphate	HMDB0006744	440649	C05381	CC1=C(SC(=[N+]1CC2=CN=C(N=C2N)C)C(CCC(=O)O)O)CCOP(=O)(O)OP(=O)(O)O	1
C06006	(S)-2-Aceto-2-hydroxybutanoic acid	HMDB0006900	440875	C06006	CC[C@](C(=O)C)(C(=O)O)O	1
C17622	10-Oxogeranial	METPA1454	NA	C17622	NA	1
C11924	Perillic acid	HMDB0004586	1256	C11924	CC(=C)C1CCC(=CC1)C(=O)O	1
C03742	(S)-4-Hydroxymandelonitrile	HMDB0060318	440104	C03742	O[C@H](C#N)C1=CC=C(O)C=C1	1
C05259	3-Oxohexadecanoyl-CoA	HMDB0006402	440601	C05259	CCCCCCCCCCCCCC(=O)CC(=O)SCCNC(=O)CCNC(=O)C(C(C)(C)COP(=O)(O)OP(=O)(O)OC[C@@H]1[C@H]([C@H]([C@@H](O1)N2C=NC3=C2N=CN=C3N)O)OP(=O)(O)O)O	1
C05823	3-Mercaptolactic acid	HMDB0002127	160645	C05823	C(C(C(=O)O)O)S	1
C00978	N-Acetylserotonin	HMDB0001238	903	C00978	CC(=O)NCCC1=CNC2=C1C=C(C=C2)O	1
C06001	(S)-3-Hydroxyisobutyric acid	HMDB0000023	87	C06001	C[C@@H](CO)C(=O)O	1
C05984	2-Hydroxybutyric acid	HMDB0000008	11266	C05984	CCC(C(=O)O)O	1
C04666	D-Erythro-imidazole-glycerol-phosphate	HMDB0012208	440431	C04666	C1=C(NC=N1)[C@@H]([C@@H](COP(=O)(O)O)O)O	1
C01180	2-Oxo-4-methylthiobutanoic acid	HMDB0001553	473	C01180	CSCCC(=O)C(=O)O	1
C04043	3,4-Dihydroxyphenylacetaldehyde	HMDB0003791	119219	C04043	C1=CC(=C(C=C1CC=O)O)O	1
C05852	Ortho-Hydroxyphenylacetic acid	HMDB0000669	11970	C05852	C1=CC=C(C(=C1)CC(=O)O)O	1
C00345	6-Phosphogluconic acid	HMDB0001316	91493	C00345	C([C@H]([C@H]([C@@H]([C@H](C(=O)O)O)O)O)O)OP(=O)(O)O	1
C05576	3,4-Dihydroxyphenylglycol	HMDB0000318	91528	C05576	C1=CC(=C(C=C1C(CO)O)O)O	1
C04350	(E)-4-Hydroxyphenylacetaldehyde oxime	NA	6999	C04350	NA	1
C00986	1,3-Diaminopropane	HMDB0000002	428	C00986	C(CN)CN	1
C00212	Adenosine	HMDB0000050	60961	C00212	C1=NC2=C(C(=N1)N)N=CN2[C@H]3[C@@H]([C@@H]([C@H](O3)CO)O)O	1
C00330	Deoxyguanosine	HMDB0000085	187790	C00330	C1[C@@H]([C@H](O[C@H]1N2C=NC3=C2NC(=NC3=O)N)CO)O	1
C08586	delta-Carotene	HMDB0036925	0	C08586	CC(C)=CCC\C(C)=C/C=C/C(/C)=C/C=C/C(/C)=C/C=C/C=C(\C)/C=C/C=C(/C)\C=C\C1C(C)=CCCC1(C)C	1
C05433	Alpha-Carotene	HMDB0003993	4369188	C05433	CC1=C(C(CCC1)(C)C)/C=C/C(=C/C=C/C(=C/C=C/C=C(\C)/C=C/C=C(\C)/C=C/C2C(=CCCC2(C)C)C)/C)/C	1
C02094	B-Carotene	HMDB0000561	5280489	C02094	CC1=C(C(CCC1)(C)C)/C=C/C(=C/C=C/C(=C/C=C/C=C(/C=C/C=C(/C=C/C2=C(CCCC2(C)C)C)\C)\C)/C)/C	1
C05435	gamma-Carotene	HMDB0112262	5280791	C05435	CC(C)=CCC\C(C)=C\C=C\C(\C)=C\C=C\C(\C)=C\C=C\C=C(/C)\C=C\C=C(/C)\C=C\C1=C(C)CCCC1(C)C	1
C05432	Lycopene	HMDB0003000	53477748	C05432	CC(=CCC/C(=C/C=C/C(=C/C=C/C(=C/C=C/C=C(/C=C/C=C(/C=C/C=C(/CCC=C(C)C)\C)\C)\C)/C)/C)/C)C	1
C15858	Prolycopene	HMDB0035776	10918539	C15858	CC(=CCC/C(=C/C=C\C(=C/C=C/C(=C/C=C/C=C(/C=C/C=C(\C=C/C=C(/CCC=C(C)C)\C)/C)\C)/C)\C)/C)C	1
C20484	9-cis-beta-Carotene	HMDB0112264	9828626	C20484	C/C(/C=C/C=C(/C)\C=C\C1=C(C)CCCC1(C)C)=C\C=C\C=C(/C)\C=C\C=C(/C)\C=C\C1=C(C)CCCC1(C)C	1
C16276	epsilon-Carotene	METPA1272	NA	C16276	NA	1
C16361	1,3,7-Trimethyluric acid	HMDB0002123	79437	C16361	CN1C2=C(NC1=O)N(C(=O)N(C2=O)C)C	1
C00988	Phosphoglycolic acid	HMDB0000816	529	C00988	C(C(=O)O)OP(=O)(O)O	1
C02463	Precorrin 2	METPA0294	NA	C02463	NA	1
C05274	Decanoyl-CoA (n-C10:0CoA)	HMDB0006404	440615	C05274	CCCCCCCCCC(=O)SCCNC(=O)CCNC(=O)C(C(C)(C)COP(=O)(O)OP(=O)(O)OC[C@@H]1[C@H]([C@H]([C@@H](O1)N2C=NC3=C2N=CN=C3N)O)OP(=O)(O)O)O	1
C00262	Hypoxanthine	HMDB0000157	790	C00262	C1=NC2=C(N1)C(=O)N=CN2	1
C05668	3-Hydroxypropionyl-CoA	HMDB0006807	440753	C05668	CC(C)(COP(=O)(O)OP(=O)(O)OC[C@@H]1[C@H]([C@H]([C@@H](O1)N2C=NC3=C2N=CN=C3N)O)OP(=O)(O)O)C(C(=O)NCCC(=O)NCCSC(=O)CCO)O	1
C00167	Uridine diphosphate glucuronic acid	HMDB0000935	17473	C00167	C1=CN(C(=O)NC1=O)[C@H]2[C@@H]([C@@H]([C@H](O2)COP(=O)(O)OP(=O)(O)O[C@@H]3[C@@H]([C@H]([C@@H]([C@H](O3)C(=O)O)O)O)O)O)O	1
C00617	UDP-D-galacturonate	HMDB0012302	15592253	C00617	C1=CN(C(=O)NC1=O)[C@H]2[C@@H]([C@@H]([C@H](O2)COP(=O)(O)OP(=O)(O)O[C@@H]3[C@@H]([C@H]([C@H]([C@H](O3)C(=O)O)O)O)O)O)O	1
C01678	Cysteamine	HMDB0002991	6058	C01678	C(CS)N	1
C01040	L-Gulonolactone	HMDB0003466	439373	C01040	C([C@@H]([C@@H]1[C@@H]([C@@H](C(=O)O1)O)O)O)O	1
C01115	L-Galactono-1,4-lactone	METPA0133	NA	C01115	NA	1
C08276	3-Methylthiopropionic acid	HMDB0001527	563	C08276	CSCCC(=O)O	1
C00301	Adenosine diphosphate ribose	HMDB0001178	33576	C00301	C1=NC2=C(C(=N1)N)N=CN2C3C(C(C(O3)COP(=O)(O)OP(=O)(O)OCC4C(C(C(O4)O)O)O)O)O	1
C04896	PhosphoribosylformiminoAICAR-phosphate	HMDB0012277	1012	C04896	C1=NC(=C(N1C2C(C(C(O2)COP(=O)(O)O)O)O)NC=NC3C(C(C(O3)COP(=O)(O)O)O)O)C(=O)N	1
C02741	Phosphoribosyl-AMP	HMDB0012276	439795	C02741	C1=NC2=C(N1[C@H]3[C@@H]([C@@H]([C@H](O3)COP(=O)(O)O)O)O)N=CN(C2=N)[C@@H]4[C@@H]([C@@H]([C@H](O4)COP(=O)(O)O)O)O	1
C04916	Phosphoribulosylformimino-AICAR-P	HMDB0012278	53481398	C04916	C1=NC(=C(N1[C@@H]2[C@H]([C@H]([C@@H](O2)COP(=O)(O)O)O)O)NC=NCC(=O)[C@@H]([C@@H](COP(=O)(O)O)O)O)C(=O)N	1
C00105	Uridine 5'-monophosphate	HMDB0000288	6030	C00105	C1=CN(C(=O)NC1=O)[C@H]2[C@@H]([C@@H]([C@H](O2)COP(=O)(O)O)O)O	1
C01168	Pseudouridine 5'-phosphate	HMDB0001271	439424	C01168	C1=C(C(=O)NC(=O)N1)[C@H]2[C@@H]([C@@H]([C@H](O2)COP(=O)(O)O)O)O	1
